# Supplementary material for: Analysis of a Library of Escherichia coli Transporter Knockout Strains to Identify Transport Pathways of Antibiotics
Source: MDPI journal article supplement (doi:10.3390/antibiotics11081129), 2022-08-19
Supplement: s1 [file s1]

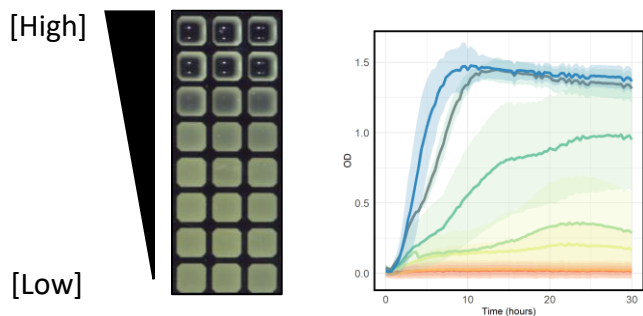

MIC determination

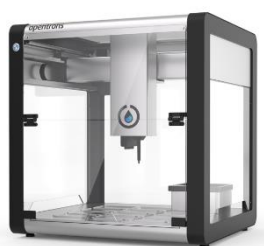

Batch preparation of plates loaded with glycerol droplets from transporter library

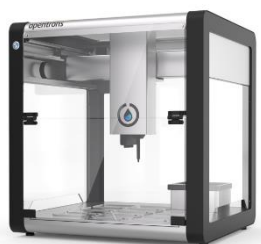

Loading of plates with sub-inhibitory concentration of antimicrobial

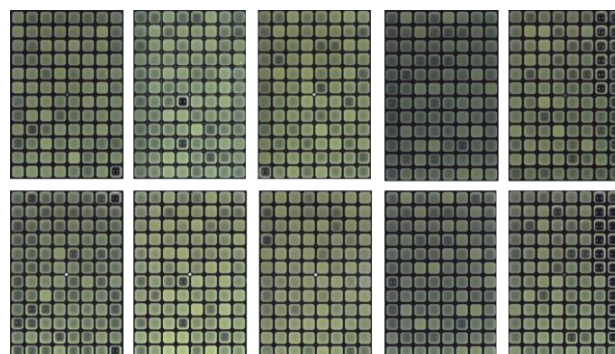

Growth determination of transporter KO library in duplicate using growth profiler.

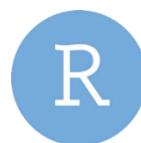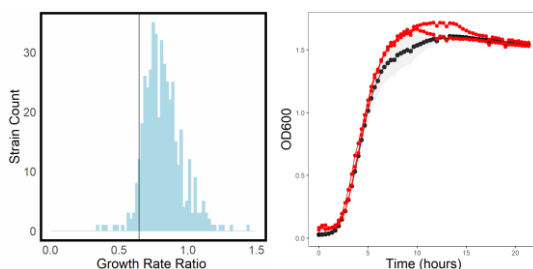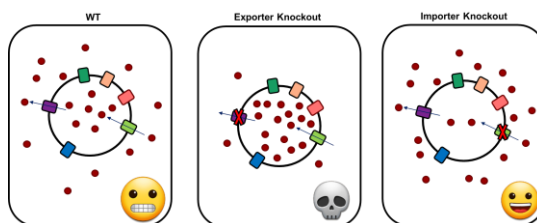

Analysis and data processing/extraction in R and inference about transport pathways.

Supplementary Figure S1: Workflow for high throughput screening of transporter knockout library against antibiotics.

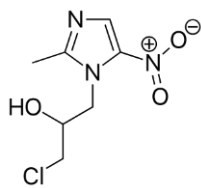

Ornidazole

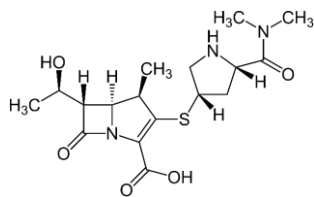

Meropenem

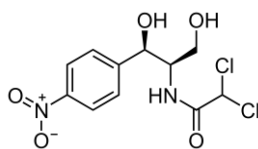

Chlroamphenicol

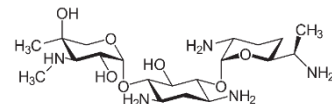

Gentamycin

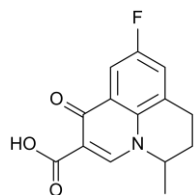

Flumequine

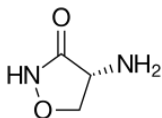

D-Cycloserine

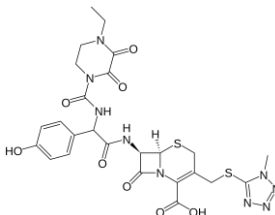

Cefoperazone

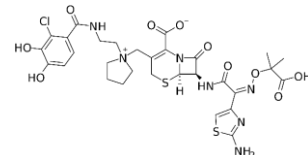

Cefiderocol

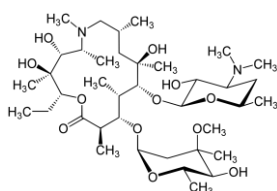

Azithromycin

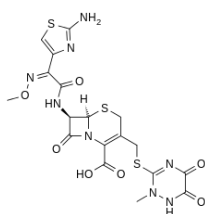

Ceftriaxone

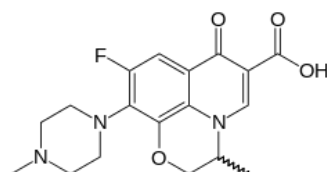

Ofloxacin

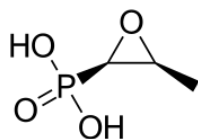

Fosfomicin

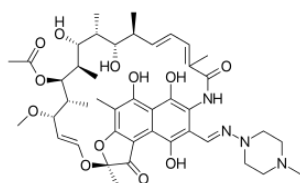

Rifampicin

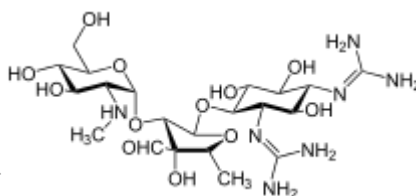

Streptomycin

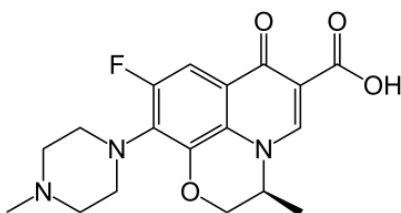

Levofloxacin

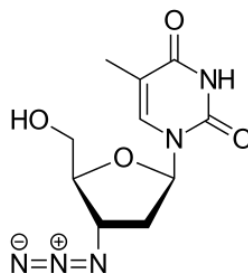

Zidovudine

Supplementary Figure S2: Structures of antibiotics used in this study.
