# Supplementary material for: Analysis of a Library of Escherichia coli Transporter Knockout Strains to Identify Transport Pathways of Antibiotics
Source: Antibiotics (Basel). 2022 Aug 19;11(8):1129. doi: 10.3390/antibiotics11081129 (PMC9405208; doi:10.3390/antibiotics11081129)
Supplement: Supplementary file 1 [file antibiotics-11-01129-s001.zip › Table S1. GrowthParameters.xlsx]

## Sheet: LB
Strain	MaxOD	Rate	AUC	Normalized MaxOD	Normalized Rate	Normalized AUC
ettA	1.69514	1.27572	27.0827	0.921813	0.993969	0.923736
hcaT	1.67829	1.14459	27.583	0.916275	0.973212	0.931135
artI	1.66727	1.19571	27.0501	0.930882	0.973987	0.938289
cydD	1.64547	1.29229	26.4097	0.993833	0.99489	0.946916
yidK	1.6984	1.27331	28.3845	0.926233	0.994535	0.949112
mdlB	1.66017	1.23991	28.6669	0.898276	0.970984	0.953581
yedA	1.63936	1.06994	26.8968	0.958263	0.994156	0.955373
yfeH	1.64083	1.31595	28.5518	0.98213	0.992793	0.956392
ydcU	1.65603	1.12068	28.3006	0.882867	0.981185	0.957961
ddpF	1.69263	1.22952	29.3829	0.987349	0.982473	0.958278
soxR	1.63801	1.24076	26.7474	0.992635	0.99856	0.958331
mepM	1.68902	1.19941	28.6388	0.956989	0.98811	0.960672
entS	1.65558	1.26075	28.7562	0.967856	0.981761	0.961357
yiaN	1.6096	1.22662	26.4813	0.963841	0.986004	0.961403
brnQ	1.62608	1.18246	26.3285	0.987108	0.993102	0.962526
yfbS	1.62549	1.11843	27.248	0.959004	0.9928	0.965305
frvA	1.66559	1.37683	28.7464	0.992009	0.976758	0.965904
pheP	1.68703	1.20968	29.2742	0.970444	0.992784	0.969696
setA	1.69642	1.1364	28.1572	0.956774	0.993593	0.970456
yhdZ	1.68361	1.10544	29.2104	0.964478	0.982292	0.970561
yfeO	1.63532	1.29607	25.8719	0.998201	0.988043	0.970619
yrbG	1.67537	1.21056	27.7895	0.959226	0.996745	0.971235
codB	1.68054	1.22359	27.5469	0.996715	0.996262	0.971515
ydgI	1.65119	1.28568	28.5474	0.95941	0.987264	0.97154
tnaB	1.69611	1.29957	29.8824	0.968862	0.980327	0.971732
dinF	1.66777	1.27885	27.6245	0.998813	0.995663	0.971932
ygaH	1.71119	1.14927	30.2748	0.977105	0.997418	0.972006
ytfL	1.67394	1.1856	27.4987	0.958884	0.984566	0.972526
mdtB	1.67327	1.25236	29.1498	0.988651	0.993547	0.973019
yahN	1.66296	1.33011	28.9909	0.969627	0.992967	0.973331
dgoT	1.6705	1.22818	29.2379	0.994149	0.988921	0.973731
atpI	1.66298	1.29481	28.312	0.98327	0.985511	0.973734
xapB	1.58881	1.14687	26.1561	0.99528	0.991709	0.974004
proY	1.64223	1.19823	28.3949	0.940707	0.979651	0.974325
yddG	1.64146	0.971247	28.4465	0.978442	0.991632	0.974513
yihN	1.71032	1.11138	28.2622	0.946564	0.995788	0.974681
lysP	1.68082	1.14717	28.44	0.996037	0.999011	0.974693
kgtP	1.69878	1.22503	28.0952	0.989263	0.98632	0.974806
fetA	1.63752	1.08301	27.1233	0.99446	0.996859	0.975061
fryC	1.6666	0.939598	29.2131	0.99871	0.989343	0.975179
yghD	1.64193	1.23045	27.4453	0.972195	0.990092	0.97521
potH	1.67032	1.1285	27.9311	0.982469	0.997821	0.975492
gntU	1.66325	1.20398	29.4946	0.960991	0.997855	0.975914
yohK	1.62459	1.17126	25.4117	0.981797	0.977448	0.976366
yhhS	1.64102	1.26955	27.639	0.972091	0.996413	0.97651
mdtL	1.6445	1.06253	27.1023	0.99392	0.981613	0.976634
yejE	1.64396	1.07308	29.0527	0.96416	0.994238	0.976719
rutG	1.63046	0.855708	28.0489	0.968075	0.998043	0.976836
adeP	1.70549	1.14958	28.297	0.947141	0.99002	0.977037
mdtJ	1.63614	1.01243	28.6776	0.966027	0.990418	0.977128
ybhN	1.60978	1.04986	28.8016	0.935334	0.994463	0.977135
lldP	1.6958	1.21569	28.1865	0.988437	0.999362	0.977338
frwD	1.59226	1.30106	27.607	0.941857	0.992131	0.977632
ybbP	1.68781	1.13836	29.1959	0.984658	0.985152	0.977829
argT	1.44466	1.04283	26.8767	0.994337	0.985605	0.977836
btuC	1.64209	0.997205	27.8589	0.997508	0.990627	0.977915
yjcE	1.75352	1.05389	28.8169	0.939875	0.993342	0.978344
dcuC	1.64335	1.14299	28.4498	0.98054	0.995698	0.978365
dtpB	1.66384	1.1603	28.421	0.97508	0.999703	0.978387
yiaM	1.66949	1.17497	29.2067	0.971874	0.998423	0.978481
kdgT	1.61799	1.20533	28.3751	0.982761	0.996147	0.978565
yhdW	1.64805	1.35132	28.2426	0.961755	0.994436	0.978616
cvrA	1.71809	1.22576	30.1843	0.974017	0.983647	0.978841
sapC	1.61314	0.9456	25.4129	0.983787	0.969811	0.978901
yhjV	1.62613	1.22916	27.156	0.948904	0.978314	0.97899
betT	1.69079	1.0995	28.6756	0.991984	0.986631	0.978998
ybjJ	1.6417	1.18207	28.5034	0.988148	0.993378	0.979198
yehY	1.61144	1.12222	28.5805	0.944417	0.979299	0.97952
rhtA	1.62258	1.18649	28.6437	0.974164	0.990821	0.979596
ydhJ	1.61387	1.06307	28.2741	0.978958	0.989862	0.979745
yifK	1.69049	1.13392	28.874	0.951409	0.983381	0.979792
yicJ	1.66013	1.28243	29.4511	0.982733	0.999742	0.97983
wzxE	1.64919	1.17764	27.7319	0.994758	0.994536	0.979902
fryB	1.63429	1.29578	28.1913	0.992568	0.98581	0.979936
yhiD	1.64643	1.33062	27.8213	0.967204	0.992005	0.980023
tyrP	1.62717	1.17454	28.1481	0.979039	0.989678	0.980304
frvB	1.67948	1.30527	27.8988	0.983829	0.996148	0.980517
yhgE	1.64121	1.36647	27.0034	0.979501	0.987201	0.980569
ybhF	1.70562	0.969838	28.9324	0.986489	0.98103	0.980577
setC	1.6644	1.05763	28.2571	0.989304	0.993572	0.980587
yijE	1.6354	1.20408	28.1489	0.994672	0.993931	0.980952
yhhJ	1.6293	1.3296	28.73	0.971231	0.990032	0.981418
mdfA	1.56922	1.20769	25.9827	0.975041	0.997698	0.981704
ydiN	1.53641	1.19536	27.7217	0.977125	0.967642	0.981835
narK	1.67024	1.08741	27.8106	0.994984	0.997583	0.981985
ydiK	1.63307	1.14165	28.4685	0.968637	0.992522	0.982166
nupX	1.62919	1.04517	28.4697	0.966972	0.990425	0.982182
ydhP	1.54693	0.946819	27.5199	0.972444	0.997196	0.982297
leuE	1.61948	1.08335	28.641	0.961232	0.988588	0.982347
eamB	1.66199	1.18045	29.4724	0.961434	0.988603	0.982378
corC	1.64445	1.47659	28.5615	0.991249	0.978281	0.982526
yjhF	1.60696	1.11101	27.5565	0.997852	0.980893	0.982593
ydcS	1.65706	0.759405	24.0287	0.983345	0.989109	0.982747
mscS	1.61251	1.17735	28.1829	0.961133	0.978678	0.982925
mscM	1.7111	1.16733	28.7377	0.958986	0.994529	0.983063
nimT	1.66491	1.28384	28.0299	0.984349	0.980535	0.98312
tsgA	1.69468	1.2093	28.5357	0.953521	0.997951	0.983131
yhdY	1.64618	1.2123	27.8173	0.995797	0.995531	0.983378
mscK	1.64475	1.14537	26.7786	0.996466	0.988246	0.983482
yjeM	1.6008	1.18595	27.9573	0.961859	0.989681	0.983789
glpT	1.72117	1.13077	28.0298	0.998292	0.991923	0.983804
ydiM	1.62248	1.10431	28.5941	0.948608	0.993608	0.983859
aaeA	1.66847	1.17129	28.9671	0.96014	0.993403	0.983911
yneE	1.55208	1.09966	26.4834	0.99692	0.992577	0.983962
potE	1.58507	1.15352	27.3954	0.979081	0.985988	0.984063
ydcT	1.58784	1.2833	27.0036	0.974218	0.997328	0.984106
lacY	1.75067	1.20187	30.4151	0.9873	0.993036	0.984135
ybhR	1.66567	1.17769	26.6598	0.99984	0.98836	0.984178
rhtC	1.63818	1.3908	28.0426	0.996347	0.992747	0.984193
metI	1.68071	1.16341	26.9208	0.987265	0.994985	0.984401
ydhC	1.63707	1.02119	28.903	0.988847	0.998298	0.984652
ddpB	1.647	0.956808	27.5664	0.981084	0.997764	0.984759
ycaD	1.61069	0.971372	28.3761	0.954633	0.981167	0.984804
dtpD	1.66048	1.23333	29.2464	0.979992	0.999716	0.984829
yejB	1.54776	0.940161	26.6204	0.94566	0.994346	0.984902
dcuA	1.62647	1.20965	28.456	0.99519	0.999987	0.985087
tqsA	1.64374	1.06587	29.0541	0.966802	0.996217	0.98509
ulaA	1.66578	1.36601	28.0821	0.983305	0.988126	0.985286
ykgG	1.60247	1.25469	26.8917	0.986042	0.986242	0.985434
rbbA	1.66942	1.14429	27.787	0.972508	0.997244	0.985506
sapB	1.53806	0.970543	25.2692	0.978567	0.99155	0.98556
macB	1.56359	1.02606	27.5618	0.976319	0.985064	0.985578
barA	1.6498	0.952842	28.2464	0.961156	0.99325	0.9856
yjiJ	1.68231	1.21946	28.6608	0.963564	0.980768	0.985634
mlaC	1.65778	1.21561	28.8638	0.987092	0.990273	0.985674
ynfM	1.62468	1.12147	28.7376	0.983036	0.997087	0.985698
ycfT	1.65145	1.13454	27.287	0.983331	0.989999	0.985707
gsiC	1.59104	1.01937	27.1779	0.960074	0.989729	0.985836
ygiS	1.62683	1.27041	28.4851	0.964463	0.997193	0.985841
yihP	1.67603	1.1253	29.2632	0.963492	0.98987	0.9859
mdtI	1.72054	0.942213	27.0463	0.980537	0.996191	0.985912
rcnA	1.61578	1.20199	28.4508	0.982303	0.98473	0.985973
yfjD	1.62973	1.29047	28.9745	0.982101	0.986503	0.986181
shiA	1.68457	1.39042	29.8769	0.980998	0.999901	0.986359
cusA	1.68232	0.939237	29.0178	0.970176	0.998426	0.98637
ycjN	1.63033	1.22935	27.3017	0.998835	0.984382	0.986426
yjjP	1.6726	1.3793	28.2651	0.994375	0.982285	0.986581
ycjV	1.57349	1.11821	25.715	0.960187	0.9887	0.986614
mdtD	1.60816	1.0923	28.2836	0.97124	0.990508	0.986719
yccA	1.55974	1.05695	26.065	0.909994	0.998129	0.986915
uup	1.59955	1.04682	26.6326	0.994559	0.994319	0.986967
yhbE	1.58172	1.15697	27.2613	0.952644	0.976505	0.9871
nagE	1.55946	1.10396	26.2122	0.975022	0.997145	0.987224
ydeE	1.61943	1.13046	27.9817	0.945295	0.989773	0.987366
yiaV	1.65362	1.21548	29.1293	0.992506	0.982069	0.987478
artQ	1.65152	1.0879	28.8164	0.994542	0.999859	0.987516
thiP	1.61725	1.12422	28.552	0.948265	0.991758	0.987552
yeeO	1.67497	1.13065	29.3837	0.945885	0.996796	0.987599
zntA	1.69166	1.09701	28.4763	0.956693	0.985398	0.98764
galP	1.75729	1.22523	29.8372	0.994145	0.999864	0.987714
zitB	1.61572	1.16125	28.2667	0.996813	0.984817	0.98779
yfdC	1.65831	1.25422	29.395	0.973337	0.988458	0.987809
yhdX	1.60653	1.34929	28.2041	0.983088	0.987339	0.987809
yaaJ	1.60876	1.07695	28.3127	0.955162	0.994267	0.98782
ynjD	1.63677	1.13929	27.2686	0.996647	0.993849	0.987859
emrD	1.65153	1.33102	29.2179	0.975445	0.990508	0.988
yjfF	1.63383	0.898627	25.8131	0.981566	0.992495	0.988082
dauA	1.6737	1.16982	29.5763	0.986925	0.993801	0.988154
alx	1.65723	1.292	28.3786	0.999155	0.99694	0.988176
yhjE	1.58592	1.0946	27.497	0.960798	0.984309	0.98819
yebQ	1.53561	0.657868	24.5509	0.992565	0.978692	0.98832
dhaM	1.66561	1.22775	29.5058	0.973604	0.993753	0.988462
idnT	1.68055	1.12675	29.4368	0.991832	0.976851	0.988478
phnL	1.69223	1.10317	27.7254	0.966175	0.996748	0.988519
kup	1.64042	1.30958	27.6216	0.990256	0.992713	0.988527
ybaT	1.61259	1.08904	27.4249	0.972244	0.993102	0.988586
hsrA	1.66657	1.17251	27.2097	0.987065	0.98962	0.98879
sufB	1.60999	1.3771	27.9119	0.992903	0.999928	0.988804
yfdV	1.643	0.921988	28.0017	0.980845	0.994292	0.988887
ybaE	1.63795	1.24447	28.0523	0.983994	0.989294	0.988887
ybjL	1.63898	1.09365	28.7825	0.986029	0.990135	0.989067
amtB	1.61089	1.06449	27.5762	0.948396	0.992076	0.989113
zupT	1.67088	1.28791	29.2396	0.997183	0.99924	0.98925
lplT	1.5999	0.904434	27.7946	0.963739	0.990084	0.989289
copA	1.62735	1.14485	27.0705	0.993397	0.984345	0.989473
modB	1.61298	1.27902	27.8346	0.998317	0.998861	0.989596
uidB	1.65002	1.23871	28.3188	0.980386	0.997251	0.989625
ghxQ	1.61838	1.18749	27.2787	0.997812	0.985849	0.98967
yegH	1.60636	1.40292	27.7327	0.986342	0.995751	0.989703
yfcC	1.63052	1.07912	28.654	0.962901	0.991488	0.989748
ybaL	1.39466	0.951704	24.8688	0.974482	0.964163	0.989842
fryA	1.58458	1.23547	26.9542	0.94907	0.996707	0.989959
ybiO	1.50584	0.913801	25.4782	0.997274	0.993877	0.990014
yeeA	1.70682	1.16704	28.7804	0.955408	0.990809	0.990071
psuT	1.63633	1.06235	28.3617	0.97594	0.995737	0.990113
sapD	1.56755	0.85324	24.4367	0.941569	0.978208	0.990158
narU	1.71232	1.25662	29.6861	0.968218	0.999818	0.990226
caiT	1.64829	1.26428	28.4056	0.992363	0.995807	0.990238
sgcB	1.64321	1.22981	28.5569	0.953373	0.999439	0.990437
ybhI	1.64402	1.05656	29.0995	0.983941	0.990387	0.990508
sstT	1.64918	1.17472	27.9374	0.998036	0.996076	0.990594
yqcE	1.63157	1.06218	28.7077	0.954602	0.997197	0.990842
ybhG	1.65232	1.01489	28.6286	0.993993	0.985913	0.990876
mdtK	1.62832	0.840832	28.429	0.976051	0.994169	0.990967
yhfK	1.63893	1.14972	26.7136	0.985091	0.997519	0.991158
rcnB	1.61118	1.35024	27.7843	0.993571	0.996551	0.991161
oppB	1.60041	1.03089	26.6262	0.998632	0.985655	0.991166
ynjC	1.63982	1.28992	28.3052	0.987403	0.994377	0.991266
yfcJ	1.58566	0.951783	27.8898	0.965215	0.989667	0.991301
yhjX	1.66339	1.25618	28.879	0.947204	0.980103	0.991413
yhhT	1.649	1.44298	29.1901	0.994115	0.994169	0.991449
ydcO	1.57935	1.1162	26.6752	0.963786	0.988401	0.991496
zntB	1.60999	1.30393	28.474	0.976842	0.993211	0.991534
ytfT	1.62816	1.36695	28.0776	0.996354	0.99897	0.991632
ycjO	1.59862	1.07509	28.0969	0.988907	0.991791	0.99166
ansP	1.6763	1.05299	29.707	0.995678	0.996519	0.991677
ygaZ	1.36973	1.0298	24.9723	0.997824	0.994987	0.991862
mdlA	1.613	1.16815	27.8574	0.994226	0.98638	0.991893
uacT	1.68655	1.23392	30.0695	0.99111	0.998439	0.99197
yggR	1.59735	1.24611	27.5058	0.995311	0.987945	0.992002
yehW	1.60499	0.951543	28.0172	0.989142	0.992555	0.992072
aqpZ	1.69661	1.10308	27.9007	0.989567	0.995313	0.992129
frwC	1.61823	1.2582	28.1306	0.977174	0.996928	0.992144
corA	1.68805	1.02653	27.3156	0.969748	0.989382	0.992199
gdx	1.60625	1.19471	27.029	0.981846	0.989273	0.992286
lsrC	1.60601	1.09849	28.0429	0.995053	0.990375	0.992362
trkH	1.60745	1.35638	27.452	0.997951	0.994084	0.992395
ydfJ	1.70503	1.31793	30.198	0.971357	0.999157	0.992424
yqgA	1.63687	1.17938	26.0739	0.974921	0.984892	0.992534
gadC	1.67357	1.09379	29.3483	0.999597	0.993689	0.99257
chbC	1.57747	1.18774	27.1738	0.991881	0.992865	0.992593
sapF	1.59965	1.19264	28.179	0.997379	0.991837	0.992639
citT	1.61298	1.01923	27.1543	0.990636	0.987772	0.992712
sapA	1.58601	1.18544	27.7521	0.984537	0.997946	0.992807
kefC	1.63079	1.17703	27.2586	0.987041	0.982899	0.993084
yphF	1.64396	1.11291	29.0469	0.984361	0.997896	0.993164
ydcV	1.6396	1.27166	28.2593	0.988483	0.995139	0.993179
yhdP	1.69897	1.17316	29.7822	0.974063	0.989312	0.993275
araE	1.66296	1.16299	29.0461	0.993303	0.995996	0.993398
yajR	1.58466	1.13029	26.5855	0.99369	0.996407	0.993515
ddpC	1.59909	1.41249	27.1197	0.997537	0.998833	0.993589
yjeH	1.66483	1.19939	28.2858	0.998059	0.991313	0.993599
argO	1.62656	1.16373	27.8315	0.962493	0.986855	0.993636
glpF	1.63569	1.19014	28.4176	0.990909	0.996123	0.99377
mltF	1.63611	1.23934	28.7296	0.99042	0.990758	0.993862
ydjN	1.70515	1.1374	29.1002	0.98026	0.994459	0.993869
ydjK	1.66456	0.966153	28.6602	0.98525	0.997431	0.993884
yadH	1.67601	1.23718	28.6981	0.992832	0.998801	0.993904
yghE	1.62508	1.20774	27.0968	0.950665	0.979378	0.994042
mlaE	1.62246	1.27236	26.9709	0.979376	0.974403	0.994213
ybiT	1.69366	1.16266	29.0342	0.983265	0.993947	0.994238
sbp	1.57092	1.24842	25.8251	0.995894	0.994018	0.99429
ybhS	1.52617	0.976429	27.29	0.978599	0.994949	0.994299
ptsG	1.66009	1.09299	28.361	0.969891	0.99868	0.99458
ycaM	1.67582	1.2162	29.354	0.989754	0.995095	0.994582
xylE	1.68795	1.15341	28.7967	0.963459	0.997733	0.994625
glnP	1.65228	1.04702	29.1405	0.987423	0.99813	0.994636
phoR	1.70596	1.04929	29.6508	0.979846	0.998631	0.994689
chaA	1.56528	0.996175	25.8637	0.98897	0.996758	0.994711
frwB	1.61549	1.34111	27.8357	0.960975	0.998504	0.994841
glvB	1.69499	1.02179	28.4719	0.974888	0.992637	0.994869
ybbA	1.61496	1.07951	27.1662	0.988372	0.986274	0.994898
rarD	1.62979	1.42399	27.6922	0.995319	0.989079	0.994939
yibH	1.6508	1.31823	27.3165	0.98099	0.983165	0.995012
fieF	1.70559	1.28459	28.9486	0.987044	0.995975	0.995054
mdtH	1.64559	0.892376	27.5915	0.996017	0.992575	0.995127
murP	1.61611	1.07875	28.413	0.946529	0.984415	0.995162
ydjX	1.62979	1.22336	28.1481	0.998141	0.982466	0.995174
ccmC	1.56061	1.02529	26.3048	0.988889	0.996471	0.995175
yeaV	1.64511	1.16681	28.7167	0.988195	0.989493	0.99519
arnE	1.62389	0.891148	27.1883	0.989354	0.996006	0.995243
sgcC	1.63677	1.32946	28.3344	0.961968	0.992561	0.995264
acrB	1.66339	1.19595	27.2773	0.987521	0.9917	0.995265
bcr	1.65759	1.3236	27.9578	0.984718	0.992953	0.995296
yadI	1.48872	1.00183	26.9447	0.953264	0.973145	0.9953
manY	1.39812	1.07923	25.294	0.996021	0.99474	0.995373
dlsT	1.63148	1.39046	28.5346	0.97203	0.993288	0.995402
yeeE	1.64616	1.23708	26.8468	0.990906	0.982312	0.99542
nlpA	1.69592	1.11169	27.8887	0.97659	0.998298	0.995422
malX	1.58734	1.25692	27.5644	0.989895	0.997268	0.995452
ydjE	1.55651	0.981067	24.7465	0.989726	0.999104	0.995503
phnK	1.66805	1.17228	28.1377	0.97385	0.988219	0.995539
yjbB	1.70254	1.11448	27.2848	0.994733	0.998981	0.995551
cynX	1.63548	1.05823	27.299	0.978893	0.991021	0.995583
yegT	1.68876	1.07085	28.6071	0.982451	0.992749	0.995617
kdpD	1.6677	1.00197	28.0574	0.948723	0.992455	0.99564
torT	1.59442	1.17792	26.7776	0.989632	0.998598	0.995714
ygcS	1.6899	1.11408	29.5823	0.933861	0.984141	0.995775
yadS	1.62491	1.04604	28.2569	0.962679	0.988486	0.995802
mdtG	1.64991	1.04385	28.7948	0.999373	0.996445	0.995816
guaB	1.63321	0.905387	28.1737	0.988593	0.992957	0.995819
araJ	1.62917	1.21724	27.8482	0.994145	0.996307	0.995845
rbsC	1.70423	1.19504	30.4579	0.976426	0.99742	0.995852
ynfA	1.46705	0.702527	24.4628	0.99259	0.987907	0.995916
putP	1.67441	1.0113	29.2528	0.98359	0.994747	0.995961
yadG	1.63484	1.24067	26.0973	0.974714	0.997057	0.996146
rhtB	1.65997	1.38579	28.7311	0.9851	0.995733	0.996177
atoS	1.73635	1.00102	29.6114	0.979671	0.993548	0.99618
ydcZ	1.6585	1.12296	29.0919	0.975652	0.996677	0.99627
pstC	1.67933	1.05174	28.8168	0.985212	0.996753	0.996271
tdcC	1.68644	1.20867	28.9572	0.999489	0.995455	0.996313
mdtN	1.68957	1.24048	28.5985	0.987486	0.99762	0.996328
eamA	1.67994	1.30482	27.5607	0.993368	0.990899	0.996478
mhpT	1.71555	1.4479	30.1359	0.995513	0.99258	0.996505
ygaY	1.66671	1.2723	28.5787	0.95047	0.98523	0.996629
hisM	1.67561	1.12687	28.3205	0.993185	0.999445	0.996659
ssuC	1.45144	1.17023	26.0149	0.999242	0.996237	0.996688
znuB	1.67925	1.11541	29.0005	0.998125	0.999594	0.99679
yccS	1.60735	1.27404	27.2234	0.999229	0.993815	0.996837
yihO	1.68888	1.17799	27.9527	0.965752	0.985282	0.996875
fetB	1.60484	1.23962	27.2127	0.993917	0.987396	0.996917
adeQ	1.61706	1.35059	27.2604	0.982659	0.991121	0.996926
kdpA	1.64717	1.20702	27.8715	0.990165	0.996185	0.996941
yraQ	1.66153	1.07196	27.9398	0.992386	0.990866	0.996964
atpB	1.63783	1.22297	28.7794	0.980436	0.998706	0.996981
gltK	1.6025	1.17141	26.9507	0.977728	0.994833	0.997031
ycjP	1.67787	1.21137	29.3784	0.977472	0.998845	0.997044
mdtF	1.60098	1.14934	27.2446	0.997058	0.985364	0.997108
nepI	1.68777	1.1457	29.5037	0.944574	0.991093	0.997151
ygdQ	1.58909	1.00256	27.8155	0.949717	0.991126	0.997212
ybbY	1.63391	1.08647	28.4048	0.969656	0.99988	0.997383
adiC	1.73316	1.13933	29.0832	0.965824	0.996106	0.997591
ybiR	1.6619	1.16448	29.7845	0.993245	0.997084	0.997675
eutH	1.59718	1.10855	27.2638	0.992247	0.999436	0.997876
hofC	1.68724	1.24181	29.3768	0.970441	0.996491	0.997979
uhpC	1.67505	1.15763	29.4516	0.99687	0.990834	0.998107
nhaB	1.61291	1.10251	27.8114	0.99475	0.997003	0.998199
garP	1.70518	1.05615	29.3649	0.982556	0.988077	0.99824
yddB	1.58021	1.31621	27.1987	0.92934	0.992982	0.998248
sgcA	1.58084	1.30387	27.2977	0.963307	0.990149	0.998298
kch	1.66618	1.07772	28.3908	0.979617	0.999325	0.998364
dtpA	1.62781	0.905001	28.6911	0.991902	0.994635	0.998407
lsrA	1.69793	1.17045	28.7209	0.992259	0.995639	0.99844
yddA	1.69256	1.28137	29.0021	0.997914	0.993354	0.998466
ygjI	1.63317	1.28204	28.2699	0.98958	0.981957	0.998622
yoaE	1.61951	1.12409	28.3464	0.974075	0.994461	0.998787
bglF	1.75924	1.25457	30.5737	0.975642	0.990813	0.998849
plaP	1.62701	1.28036	28.6049	0.986863	0.994306	0.998881
arnF	1.60885	1.27364	27.3293	0.996091	0.98782	0.99892
yggT	1.57025	1.16138	27.2638	0.977856	0.9927	0.999016
focA	1.64353	1.17277	28.0875	0.990112	0.996932	0.999039
mglC	1.62801	1.02932	28.1446	0.963059	0.999353	0.999074
ydhK	1.66745	1.10625	28.8433	0.983451	0.998842	0.999123
ypjA	1.64475	1.15169	27.6965	0.993621	0.995317	0.999135
yjhB	1.60535	1.23016	27.6869	0.98629	0.995299	0.999139
yghF	1.63792	1.25268	28.1811	0.94929	0.991318	0.999156
srlA	1.64194	1.17206	27.3358	0.998233	0.993091	0.999181
fepD	1.59018	1.14259	27.752	0.999192	0.99796	0.99932
dtpC	1.70989	1.37472	30.0932	0.975833	0.998054	0.999346
actP	1.71055	1.27515	28.1302	0.970246	0.994007	0.999427
ddpD	1.62869	1.25652	27.5892	0.954981	0.992361	0.999488
glvC	1.70299	1.15891	28.824	0.987164	0.991387	0.99963
aroP	1.64295	1.1517	27.9198	0.987012	0.99497	0.999632
clcB	1.64143	1.27016	28.0268	0.983163	0.992382	0.999663
ynjB	1.64052	1.3065	27.5736	0.994334	0.999619	0.999669
ttdT	1.61514	1.26205	28.4422	0.996573	0.995493	0.9997
sotB	1.61577	1.25605	27.7179	0.99822	0.993417	0.999725
yicL	1.69552	1.28592	29.7096	0.993029	0.989668	0.99974
setB	1.66102	1.04968	29.1247	0.996788	0.99965	0.999792
clcA	1.61212	1.28526	27.2626	0.993822	0.991173	0.999856
ghxP	1.65712	1.18592	27.9991	0.975975	0.985869	0.999944
yaaU	1.60019	1.15058	27.4702	0.976782	0.994385	0.999945
acrD	1.63901	1.12031	29.2015	1	1	1
acrF	1.69114	1.01222	29.2381	1	1	1
agaC	1.61382	1.25987	28.4875	1	1	1
agaV	1.65309	1.19717	28.9817	1	1	1
alsC	1.65722	1.28105	28.8128	1	1	1
ampG	1.67679	1.10014	28.5063	1	1	1
araH	1.63388	1.08962	27.8031	1	1	1
arsB	1.71787	1.20929	29.7485	1	1	1
artJ	1.47604	1.12508	26.8101	1	1	1
ascF	1.62574	1.20816	26.9246	1	1	1
atoE	1.62536	1.2085	26.9148	1	1	1
cadB	1.62177	1.15312	27.9352	1	1	1
cmtA	1.62773	1.15229	28.2753	1	1	1
cmtB	1.63889	1.18436	27.2681	1	1	1
crr	1.66867	1.27029	28.4372	1	1	1
cycA	1.70634	1.29318	29.7758	1	1	1
cysP	1.65802	1.16865	28.7865	1	1	1
cysW	1.56865	1.1527	27.148	1	1	1
dctA	1.64722	1.14557	28.4729	1	1	1
dcuB	1.67884	1.23327	28.7065	1	1	1
dcuD	1.60447	1.12667	27.0781	1	1	1
dppB	1.63738	1.21979	29.0967	1	1	1
dsdX	1.7085	1.05854	27.8282	1	1	1
emrB	1.7016	1.11147	28.3634	1	1	1
emrY	1.69206	1.20278	28.6917	1	1	1
exbB	1.75291	1.1933	31.0401	1	1	1
exbD	1.74491	1.16174	29.3695	1	1	1
exuT	1.67435	1.23705	29.1387	1	1	1
feoB	1.62984	1.35043	27.4794	1	1	1
focB	1.64591	1.17518	28.7018	1	1	1
frlA	1.63539	1.26364	28.5291	1	1	1
fruA	1.64828	1.22419	28.0158	1	1	1
fsr	1.72336	1.19539	29.5295	1	1	1
fucP	1.70916	1.1178	30.5711	1	1	1
gabP	1.68458	1.18342	29.435	1	1	1
gltP	1.64319	1.1918	27.361	1	1	1
gltS	1.64899	1.33195	28.3611	1	1	1
gntP	1.64454	1.27297	28.8488	1	1	1
gntT	1.66007	1.19088	28.5052	1	1	1
gudP	1.62752	1.32397	27.5977	1	1	1
kefB	1.60643	1.2644	27.1292	1	1	1
livH	1.64417	1.19408	28.2722	1	1	1
livJ	1.71171	1.04998	28.5782	1	1	1
livK	1.62723	1.30646	27.8543	1	1	1
lptB	1.61198	1.19456	26.7145	1	1	1
malF	1.72698	1.34285	27.0497	1	1	1
mdtO	1.78589	1.25836	30.9044	1	1	1
melB	1.70338	1.16658	29.5803	1	1	1
mgtA	1.50778	1.42591	27.123	1	1	1
mngA	1.71781	1.08968	29.6643	1	1	1
modF	1.62248	1.18594	27.4139	1	1	1
mscL	1.61969	1.1172	26.1224	1	1	1
mtlA	1.70943	1.27571	30.6639	1	1	1
mtr	1.70175	1.11867	30.15	1	1	1
nanT	1.75474	1.21919	30.7673	1	1	1
nikC	1.64241	1.24962	29.0748	1	1	1
nirC	1.67032	1.17605	28.6836	1	1	1
nupG	1.6377	1.2203	27.6438	1	1	1
panF	1.70736	1.28556	29.738	1	1	1
perM	1.59257	1.20355	26.5962	1	1	1
phnD	1.63898	1.27442	28.6909	1	1	1
pitA	1.62159	1.28496	27.0225	1	1	1
potB	1.64312	1.15642	27.5557	1	1	1
proP	1.73563	1.22333	30.9564	1	1	1
proW	1.61732	0.807229	25.566	1	1	1
ptsI	1.76189	1.33792	28.8626	1	1	1
ptsN	1.57405	0.984918	26.4593	1	1	1
ptsP	1.6611	1.23248	28.8417	1	1	1
puuP	1.65058	1.20733	28.2945	1	1	1
rhaT	1.72837	1.24601	30.2768	1	1	1
rhmT	1.65092	1.21699	28.1809	1	1	1
sdaC	1.68933	0.997572	28.655	1	1	1
tatC	1.6895	1.17021	28.912	1	1	1
tehA	1.68283	0.957255	27.8997	1	1	1
tolQ	1.58741	0.904349	27.6496	1	1	1
tolR	1.57857	1.15446	28.1324	1	1	1
treB	1.65039	1.20972	29.0014	1	1	1
ugpA	1.66081	1.20915	29.6491	1	1	1
uhpT	1.66472	1.32619	28.3261	1	1	1
uraA	1.61518	0.996178	28.7361	1	1	1
wt	1.77398	1.43227	30.8831	1	1	1
xanP	1.63459	1.32382	28.7896	1	1	1
xanQ	1.63619	1.03731	27.1267	1	1	1
xylH	1.6163	1.20281	26.9737	1	1	1
ybbW	1.61832	1.14625	27.5198	1	1	1
ygbN	1.61486	1.10642	28.2648	1	1	1
yheS	1.61776	1.31403	27.9711	1	1	1
yicG	1.7014	1.26644	29.8165	1	1	1
yidE	1.73116	1.21776	30.4311	1	1	1
yojI	1.65514	1.23968	29.8202	1	1	1
yphD	1.58779	1.14458	27.6571	1	1	1
yphE	1.70075	1.09253	28.4559	1	1	1
yqeG	1.64767	1.21468	28.7142	1	1	1
ytfF	1.62975	1.19611	27.9923	1	1	1

## Sheet: Azithromycin
Strain	MaxOD	Rate	AUC	Normalized MaxOD	Normalized Rate	Normalized AUC
uhpC	3.212	0	0	0	1.89997	0
yeaV	3.189	0	0	0	1.9181	0
yijE	3.138	0	0	0	1.90715	0
betT	0.0635	0.0205608	0.302583	0.0185502	0.0370542	0.0103303
glvB	0.114	0.030172	0.32	0.0287872	0.0667619	0.0111815
glnP	0.106	0.020728	0.3325	0.0195483	0.064034	0.011349
citT	0.058	0.03667	0.37425	0.0356411	0.0355186	0.0136819
tyrP	0.239	0.0103881	0.561167	0.008659	0.145365	0.0195435
corA	0.135	0.0255445	0.620583	0.0241315	0.0791248	0.0225417
tolR	0.1115	1.68954	0.672583	1.46348	0.0706335	0.0239078
mdtN	0.671	0.497647	0.702917	0.396152	0.396198	0.0244885
ydjN	0.339	0.437243	0.764583	0.376833	0.197708	0.0261131
yibH	0.197	0.00533716	0.7675	0.00397176	0.117327	0.0279564
torT	0.18	0.0396574	0.800917	0.0333183	0.112735	0.0297817
acrB	0.0915	0.658308	1.34583	0.543577	0.0545515	0.0491054
kdgT	2.1555	0.923483	1.482	0.752959	1.32707	0.0511094
tolQ	0.7445	1.04455	1.7645	1.15504	0.469003	0.0638165
ydcS	0.3085	0.277643	1.60542	0.359517	0.184145	0.0656597
uup	1.497	0.341245	2.22567	0.324208	0.930575	0.08248
pstC	0.164	0.435009	2.41175	0.407492	0.0973412	0.0833805
mlaE	0.471	0.357058	2.38925	0.274839	0.28287	0.0880736
ptsI	0.2225	1.11524	2.93342	0.833567	0.126285	0.101634
mlaC	0.691	0.696009	3.10408	0.565168	0.412769	0.106002
brnQ	0.399	0.114757	2.996	0.0957975	0.243682	0.109529
proW	0.4725	0.232734	2.84233	0.288312	0.29215	0.111176
aroP	0.4075	0.0865943	3.40158	0.0742119	0.246781	0.121789
wzxE	0.585	0.062575	3.62025	0.0528575	0.352782	0.127921
yihN	0.7305	0.150119	4.01883	0.127857	0.425314	0.138598
mdtI	0.3885	0.50634	3.92525	0.526935	0.22494	0.143086
yjfF	0.5	0.209118	3.94967	0.228418	0.303732	0.151186
ytfL	0.742	0.753338	4.39925	0.60928	0.436424	0.155585
mdtO	0.496	0.109815	4.85442	0.0872679	0.277733	0.157078
ygjI	1.1095	0.624387	4.46208	0.481951	0.667098	0.157621
ttdT	0.6155	0.210039	4.52067	0.165857	0.379364	0.158894
garP	0.7175	0.16586	4.781	0.154303	0.415759	0.162527
corC	0.389	0.300133	4.90908	0.201481	0.231415	0.168874
kdpA	0.535	0.106483	4.77767	0.0873519	0.32356	0.170893
actP	0.6165	0.481853	5.05125	0.366635	0.35825	0.179464
sapD	0.933	0.225473	4.5975	0.248815	0.582224	0.186287
yidK	0.624	0.0909351	5.74067	0.0661481	0.365396	0.191954
yjbB	0.6395	0.21298	5.40217	0.190096	0.375232	0.197111
tatC	0.9315	0.836734	5.7565	0.71503	0.551346	0.199104
araJ	0.6275	0.0919378	5.59408	0.0750877	0.383742	0.200043
phnK	0.698	0.0842488	5.75475	0.0699879	0.413523	0.203609
galP	0.8175	0.157004	6.39033	0.127392	0.465141	0.211542
clcB	0.715	0.157574	5.93175	0.121969	0.432276	0.211574
ycjO	0.8705	0.13108	6.00975	0.120571	0.540062	0.21211
tehA	0.9475	0.213481	5.94025	0.223014	0.563038	0.212914
malX	0.8295	0.492782	5.92558	0.388094	0.521145	0.213994
dinF	0.718	0.0859638	6.20892	0.06714	0.428649	0.218453
ygiS	0.8305	0.145447	6.35092	0.110419	0.50907	0.219799
ddpB	0.7555	0.118737	6.26242	0.121749	0.457687	0.223713
uidB	0.738	0.114705	6.49158	0.0907835	0.446037	0.226854
frvA	0.637	0.212583	6.79617	0.153167	0.373559	0.228357
artI	0.8365	0.0840244	6.60342	0.0654147	0.488667	0.229054
kch	0.695	0.54881	6.52208	0.498854	0.416841	0.229349
adeP	0.7675	0.188482	6.67208	0.15529	0.445527	0.230373
idnT	0.7955	0.115418	6.88808	0.101598	0.4624	0.231299
araE	0.862	0.175981	6.86	0.150304	0.516279	0.234617
yiaN	0.928	0.197155	6.637	0.154918	0.56847	0.240956
narU	0.794	0.188248	7.32275	0.145044	0.463615	0.244262
nlpA	0.845	0.159161	6.90208	0.139819	0.497406	0.246354
ptsG	0.7635	0.142078	7.05975	0.126077	0.459307	0.247575
ydgI	0.9695	0.41522	7.38713	0.309849	0.579675	0.251403
emrY	0.5925	0.262666	7.22817	0.218382	0.350165	0.251925
yaaU	0.7935	0.102198	6.954	0.086761	0.493096	0.253133
ycjP	0.767	0.124326	7.60417	0.10032	0.456599	0.25807
tdcC	0.8725	0.199616	7.5615	0.165068	0.515011	0.260164
glvC	0.8865	0.194152	7.54208	0.16538	0.516071	0.261563
dtpC	0.659	0.197885	7.89967	0.140467	0.384655	0.262335
ydcV	0.633	0.117079	7.47117	0.0910077	0.384193	0.262576
ycjN	0.6525	0.221071	7.29358	0.179619	0.393974	0.263521
ybaT	0.756	0.202898	7.33008	0.181139	0.465578	0.264228
clcA	0.8695	0.176739	7.23158	0.136662	0.534591	0.265219
ydjK	0.861	0.221473	7.67042	0.225851	0.515927	0.265996
copA	0.7415	0.135462	7.29908	0.117542	0.448515	0.266794
sufB	0.928	0.168996	7.5315	0.121848	0.576359	0.26681
aqpZ	0.8095	0.234475	7.52617	0.210346	0.474892	0.267625
bglF	0.6715	0.185879	8.21392	0.144553	0.378193	0.268351
chaA	0.9275	0.220318	7.00817	0.218725	0.590626	0.269532
yegH	0.8315	0.185746	7.56833	0.130591	0.515429	0.270093
putP	0.844	0.236626	8.01917	0.230144	0.501409	0.273026
mdlA	0.8275	0.215011	7.73658	0.182997	0.506032	0.275469
mhpT	0.9185	0.170644	8.36458	0.117327	0.531425	0.276592
gadC	1.517	0.183124	8.20158	0.167354	0.900724	0.27738
lysP	1.0645	0.647736	8.1015	0.5624	0.632695	0.277654
alx	0.886	0.20101	8.02208	0.155449	0.532991	0.279338
sapF	0.9875	0.137059	7.97592	0.114619	0.612284	0.280961
yjhF	1.0045	0.206623	7.90292	0.185578	0.613148	0.281798
yggR	0.802	0.695518	7.86233	0.555535	0.496029	0.283557
cynX	0.7025	0.151779	7.78092	0.1404	0.42568	0.283767
proY	0.789	0.31517	8.3255	0.247433	0.470668	0.285676
ybbA	0.822	0.147566	7.81717	0.135108	0.502004	0.286286
fieF	0.666	0.365983	8.34042	0.281211	0.388909	0.286686
mdtF	0.998	0.898647	7.83867	0.779582	0.614244	0.286882
ydjE	1.4485	0.185734	7.15117	0.187374	0.929776	0.287677
pheP	0.979	0.227347	8.708	0.182386	0.576121	0.288449
puuP	0.9175	0.203072	8.17542	0.168199	0.555867	0.28894
ansP	0.996	0.225943	8.67467	0.213645	0.592099	0.289577
sotB	0.7695	0.142026	8.06392	0.112873	0.473108	0.290848
ytfT	0.89	0.205737	8.28958	0.149959	0.546068	0.292768
glpF	0.7545	0.155037	8.39517	0.129083	0.459484	0.293581
kup	0.9225	0.233914	8.20842	0.176877	0.558257	0.293764
ettA	0.8105	0.274843	8.6305	0.198598	0.475248	0.294369
shiA	0.7635	0.193311	8.93167	0.136388	0.453186	0.294871
nimT	0.89	0.202129	8.42492	0.154978	0.524159	0.295496
mscK	0.808	0.541942	8.07383	0.471488	0.485487	0.296523
rarD	0.875	0.219761	8.2675	0.153606	0.531016	0.297038
psuT	1.0975	0.252055	8.51017	0.231553	0.667848	0.297091
chbC	0.854	0.183769	8.14433	0.153465	0.53751	0.297493
yihP	0.9415	0.238913	8.83967	0.20456	0.556055	0.297815
eamB	1.191	0.182826	9.14867	0.148905	0.708444	0.304944
metI	0.9345	0.204717	8.36075	0.173723	0.553226	0.305724
ddpC	0.707	0.182399	8.356	0.128815	0.441609	0.30614
lacY	0.8855	0.273338	9.46958	0.224538	0.502284	0.306406
rbsC	0.8245	0.598503	9.42317	0.489015	0.482549	0.3081
oppB	0.788	0.282476	8.39033	0.273637	0.485311	0.312332
phnL	0.956	0.203757	8.81942	0.178454	0.563097	0.314447
yeeA	1.105	0.165902	9.18358	0.135817	0.641453	0.315924
fepD	0.8175	0.168202	8.84942	0.147092	0.513044	0.318658
yegT	1.29	0.865087	9.15825	0.793675	0.758335	0.318736
xylH	1.0485	0.259881	8.61733	0.216061	0.648703	0.319471
sapC	1.2075	0.24436	8.33442	0.254228	0.725945	0.32104
yeeO	0.8855	0.2737	9.554	0.228973	0.526974	0.321114
dcuC	0.8275	0.199556	9.38508	0.171194	0.50138	0.322745
yfeO	0.8445	0.125132	8.62275	0.0963736	0.510238	0.323495
exuT	1.0705	0.154119	9.4715	0.124586	0.639353	0.325049
tnaB	1.3835	0.707635	10.0146	0.527559	0.799644	0.32566
focB	1.072	0.158644	9.50242	0.134995	0.651311	0.331074
gltK	0.7645	0.172088	9.115	0.143635	0.474603	0.337206
yddA	1.05	0.23979	9.79867	0.186745	0.616239	0.337343
mdtB	0.963	0.27003	10.1351	0.21317	0.571805	0.338308
soxR	1.1595	0.190585	9.50008	0.152472	0.706851	0.340378
codB	1.1375	0.197194	9.654	0.16063	0.674336	0.340474
mscL	1.1385	0.154894	8.97425	0.138645	0.702913	0.343546
yhfK	0.8475	0.277561	9.28383	0.237817	0.515824	0.344459
ykgG	1.0905	0.174336	9.44808	0.137007	0.671151	0.346221
fryC	1.255	0.486373	10.3903	0.516972	0.745007	0.346845
gdx	0.9225	0.24642	9.4665	0.202515	0.568157	0.347533
dhaM	0.753	0.615627	10.4853	0.488189	0.449263	0.351263
yejE	1.136	0.495373	10.4582	0.445091	0.687035	0.351594
uacT	2.056	1.01566	10.7482	0.8158	1.21716	0.354574
adeQ	0.9545	0.258858	9.70058	0.188339	0.585026	0.354755
ugpA	1.2095	0.139987	10.5198	0.115773	0.728261	0.354809
narK	0.93	0.281387	10.0674	0.25747	0.555459	0.355478
nhaB	0.758	0.196119	9.92225	0.17695	0.46855	0.356126
setA	1.312	0.139029	10.3677	0.117053	0.768439	0.357332
yicL	0.988	0.316047	10.624	0.244061	0.57669	0.357502
ybhR	0.9415	0.261256	9.70808	0.221801	0.558658	0.358385
focA	0.774	0.887043	10.0872	0.748887	0.469494	0.358791
modB	1.074	0.168678	10.1011	0.131659	0.66509	0.359121
dcuA	0.9725	0.308549	10.3803	0.253845	0.597913	0.359345
manY	0.872	0.262711	9.17217	0.242456	0.620414	0.360944
xanQ	1.1695	0.22955	9.849	0.221293	0.714772	0.363074
argT	0.9015	0.297294	10.0166	0.28347	0.615039	0.364427
ptsN	1.0755	0.213164	9.73183	0.216428	0.683271	0.367804
yjeM	0.8925	0.328572	10.4921	0.266486	0.55178	0.369206
ynjD	1.027	0.259393	10.211	0.226915	0.623596	0.369914
ybiO	0.855	0.284082	9.52808	0.310032	0.564313	0.370236
frvB	1.014	0.276938	10.5518	0.208738	0.601433	0.370847
yphE	1.288	0.186228	10.5793	0.170456	0.757314	0.371777
yhjV	1.13	1.46073	10.3234	1.12767	0.679833	0.372165
yccS	0.922	0.295621	10.1907	0.231855	0.570069	0.37315
xapB	0.7795	0.355584	10.0216	0.308583	0.48655	0.373185
yhhS	0.995	0.326403	10.568	0.249926	0.604155	0.373376
yjjP	0.9605	0.287899	10.7354	0.207554	0.564082	0.374715
yahN	0.9565	0.346913	11.2132	0.252894	0.571133	0.376467
fucP	1.134	0.213616	11.5226	0.191104	0.663485	0.376911
rcnB	1.023	0.262097	10.5834	0.192863	0.63275	0.377546
emrD	0.9485	0.331611	11.2103	0.243022	0.568863	0.379074
ulaA	0.972	0.296749	10.8689	0.213611	0.576581	0.381346
dtpB	1.3885	0.442583	11.1215	0.371934	0.834266	0.382855
yhhT	0.955	0.337385	11.318	0.232435	0.575762	0.384419
dtpA	1.2575	0.57722	11.0519	0.632646	0.768364	0.384591
bcr	0.967	0.295431	10.8634	0.219791	0.579267	0.386737
yhdY	1.027	0.282911	10.9652	0.232387	0.621081	0.387634
gntT	1.314	0.230249	11.0855	0.193343	0.791535	0.388894
setC	1.4865	0.483329	11.2413	0.452106	0.887376	0.390101
melB	1.246	0.200571	11.6226	0.171932	0.731488	0.392917
kefC	0.783	0.130635	10.8102	0.109548	0.471924	0.393835
yadG	1.2035	0.166782	10.3431	0.13103	0.733993	0.3948
srlA	0.9185	0.33303	10.8208	0.283639	0.555533	0.395524
yneE	0.932	0.395328	10.6794	0.358394	0.596025	0.396782
exbB	1.0945	0.279162	12.3816	0.233941	0.624389	0.39889
yadH	1.043	0.318079	11.5392	0.255257	0.621564	0.399636
rbbA	1.0625	0.280076	11.2777	0.23803	0.634696	0.399979
lptB	1.148	0.229428	10.7118	0.19206	0.712166	0.400971
ynjB	0.9355	0.320391	11.0605	0.243839	0.570029	0.400994
ydcO	1.027	0.28204	10.7914	0.243528	0.642726	0.401109
feoB	1.255	0.164712	11.0333	0.121969	0.770017	0.401512
guaB	0.916	0.372074	11.4627	0.406268	0.55691	0.405159
atpI	0.9865	0.330485	11.819	0.250968	0.584618	0.40649
yhhJ	0.995	0.341937	11.9193	0.249775	0.604603	0.407165
hisM	1.0725	0.305456	11.6298	0.26922	0.639709	0.409278
potE	1.3975	0.78639	11.4089	0.66747	0.869312	0.409817
fryA	1.2815	0.343344	11.1738	0.263751	0.806071	0.410384
dsdX	1.228	0.21778	11.4415	0.205736	0.718757	0.411147
aaeA	1.391	0.320773	12.1055	0.262948	0.828198	0.411181
ybhF	1.094	0.317332	12.2811	0.32278	0.629243	0.416231
rhtC	0.973	0.366305	11.8928	0.262416	0.589642	0.417395
yehY	1.168	0.424062	12.18	0.356874	0.709813	0.417436
fetB	0.98	0.324759	11.4001	0.260389	0.602955	0.417634
panF	1.3775	0.208388	12.4216	0.162099	0.806803	0.417701
hofC	0.609	0.218414	12.2967	0.170685	0.359679	0.417739
ybiR	1.0355	0.361291	12.4722	0.308164	0.621264	0.417773
ydiK	1.021	0.323392	12.1414	0.274384	0.620528	0.418881
atoE	1.428	0.1751	11.2816	0.14489	0.878576	0.41916
frlA	1.2335	0.177556	11.9739	0.140512	0.754255	0.419709
ypjA	1.3525	0.250728	11.6348	0.216315	0.81846	0.419717
yhdX	1.0745	0.339139	11.9894	0.247095	0.660365	0.419913
ynjC	1.04	0.336092	11.9953	0.257269	0.63065	0.420085
yfjD	1.005	0.379261	12.3557	0.288634	0.608343	0.420539
ycjV	1.36	0.28949	10.9617	0.248579	0.854557	0.42057
sapB	1.657	0.609953	10.7878	0.614996	1.06823	0.420751
tqsA	1.137	0.556645	12.4265	0.50491	0.689099	0.421324
yhdZ	1.349	0.240815	12.6878	0.210107	0.787064	0.421573
arnF	0.9965	0.290344	11.5764	0.227072	0.611843	0.423132
ssuC	0.973	0.316069	11.0666	0.269887	0.667846	0.423985
dlsT	0.952	0.373705	12.1852	0.261245	0.579601	0.425068
acrF	1.216	0.207856	12.4567	0.205346	0.71904	0.426043
fruA	1.286	0.156094	11.9663	0.127507	0.780208	0.427128
nepI	1.3515	0.241411	12.6394	0.199032	0.793627	0.42718
kefB	1.304	0.181244	11.661	0.143344	0.811738	0.429831
livJ	1.2565	0.290741	12.3071	0.276901	0.73406	0.430645
trkH	0.9935	0.405249	12.034	0.298159	0.614404	0.435032
lplT	1.3425	0.366061	12.2654	0.390064	0.830794	0.43656
rhaT	1.2475	0.25335	13.2632	0.203329	0.721777	0.438066
hcaT	1.341	0.400413	12.9801	0.320541	0.777625	0.438176
ybbY	1.4535	0.356028	12.4899	0.317749	0.889476	0.43856
gntP	1.2655	0.208502	12.6954	0.163792	0.769514	0.440067
yhbE	1.304	0.335432	12.2161	0.276194	0.80505	0.442331
setB	1.0735	0.355823	12.9053	0.337894	0.646062	0.443011
yjhB	1.464	0.20762	12.3056	0.166461	0.907666	0.444073
uhpT	1.3645	0.171804	12.6605	0.129547	0.81966	0.446955
mdfA	1.609	0.389173	11.8342	0.314203	1.02299	0.44713
yghF	1.3255	0.184414	12.6164	0.13975	0.802234	0.447313
mdtL	1.372	0.482912	12.4133	0.45173	0.818954	0.447316
yfbS	1.092	0.542029	12.7332	0.464765	0.666961	0.451094
mltF	1.1485	0.472387	13.0508	0.377509	0.695481	0.451477
fsr	1.2145	0.488373	13.3458	0.408548	0.704727	0.45195
yjiJ	1.3935	0.206486	13.2204	0.163157	0.812394	0.454644
artJ	1.242	0.238113	12.2172	0.211641	0.841442	0.455696
ghxQ	1.0525	0.360221	12.5757	0.302683	0.641139	0.456248
btuC	1.6	0.194301	13.0231	0.194361	0.965237	0.457143
yajR	1.0025	0.362737	12.2402	0.318898	0.630353	0.457426
adiC	1.3505	0.237715	13.3532	0.201514	0.776179	0.45803
atoS	1.316	0.330975	13.6439	0.323917	0.75302	0.459006
frwC	1.3885	0.207773	13.0813	0.161365	0.855398	0.461368
ytfF	1.3065	0.199923	12.9225	0.167144	0.801658	0.461645
amtB	0.6015	0.25471	12.888	0.226931	0.370437	0.462272
yiaV	1.339	0.307114	13.6783	0.250777	0.795221	0.463694
eutH	1.4795	0.237739	12.6736	0.212797	0.925796	0.463862
gltP	1.4595	0.200237	12.7048	0.168012	0.88821	0.464341
rhtB	1.036	0.401165	13.399	0.285172	0.621444	0.464575
yjcE	1.2165	0.271654	13.7134	0.242265	0.689129	0.465575
ycaM	1.0655	0.41497	13.7873	0.337707	0.632688	0.467144
tsgA	1.477	0.339719	13.5952	0.267865	0.869764	0.46839
ygaH	1.3805	0.541144	14.646	0.46008	0.804665	0.470226
fetA	1.6015	0.196198	13.0992	0.180157	0.974929	0.470908
yedA	1.1385	0.547812	13.3554	0.490635	0.690422	0.474384
lsrC	1.236	0.454604	13.4383	0.411796	0.7622	0.475543
mepM	1.362	0.232288	14.1985	0.185338	0.796796	0.47628
yebQ	0.9875	0.351322	11.8615	0.530061	0.629364	0.477496
lsrA	1.3765	0.226915	13.7918	0.192369	0.807158	0.479452
mdtK	1.2315	0.575145	13.7643	0.667637	0.75189	0.479788
murP	1.2095	0.552293	13.7018	0.484597	0.736738	0.479902
mdtG	1.4445	0.216887	13.8855	0.207645	0.872392	0.480205
ycfT	1.3365	0.320053	13.2942	0.277396	0.801196	0.480234
dcuB	1.126	0.284915	13.8032	0.231025	0.670702	0.480838
caiT	1.354	0.212829	13.814	0.167055	0.818015	0.481565
ydeE	1.2355	0.550835	13.6606	0.460611	0.755123	0.48203
kdpD	1.411	0.425432	13.5853	0.402824	0.839692	0.482087
yicG	1.387	0.226764	14.3951	0.179056	0.815211	0.48279
nupX	1.154	0.5792	14.0272	0.535865	0.701547	0.483926
mglC	1.259	0.293397	13.6414	0.274508	0.772836	0.484242
leuE	1.3825	0.467256	14.1717	0.414586	0.843925	0.486072
yghE	1.6215	0.386305	13.2602	0.304078	0.977222	0.486448
nanT	1.2225	0.303379	15.0027	0.248837	0.696683	0.487617
alsC	1.2945	0.343297	14.0708	0.26798	0.781129	0.488351
ynfM	1.1425	0.530088	14.2719	0.464653	0.701166	0.489526
rutG	1.084	0.359085	14.1095	0.406238	0.663542	0.491379
yhdP	1.448	0.305621	14.7685	0.253753	0.843174	0.492549
cadB	1.4085	0.224992	13.7655	0.195116	0.868497	0.492766
xylE	1.542	0.2492	14.3281	0.208161	0.911464	0.494886
znuB	1.456	0.397439	14.4647	0.355648	0.866704	0.497172
plaP	1.033	0.457649	14.2678	0.352744	0.63129	0.498232
ydhK	1.4615	0.549349	14.4046	0.488371	0.875475	0.498969
mdtD	1.1605	0.522487	14.3223	0.464582	0.714783	0.499657
yfcC	1.44	0.282715	14.4945	0.252268	0.875638	0.500659
zntA	1.361	0.906696	14.4642	0.790721	0.792789	0.501663
arnE	1.4325	0.319605	13.7478	0.354826	0.878618	0.503247
yqgA	1.2465	0.279421	13.2755	0.23098	0.750007	0.505348
uraA	1.3575	0.262395	14.5773	0.263401	0.840463	0.507282
ampG	1.278	0.325372	14.4883	0.295755	0.76217	0.508247
ydhC	1.4155	0.497938	14.9527	0.482168	0.863181	0.509403
eamA	1.104	0.476571	14.0933	0.362816	0.651185	0.509556
yfdC	1.117	0.460164	15.1652	0.357111	0.665802	0.50962
ybhI	1.399	0.518875	14.9842	0.483213	0.842782	0.510043
ybbP	1.3125	0.31218	15.2632	0.27003	0.766086	0.511197
modF	1.4635	0.225995	14.0217	0.190562	0.902014	0.51148
yjeH	1.455	0.426276	14.5619	0.354719	0.866371	0.511518
zitB	1.281	0.460056	14.7402	0.394909	0.780795	0.5151
yadI	1.4755	0.577064	13.9548	0.54909	0.964507	0.515473
cysW	1.292	0.266016	14.0205	0.230775	0.823637	0.516447
yqcE	1.2275	0.604698	15.0357	0.543453	0.750233	0.518954
yhjE	1.519	0.329566	14.4501	0.289282	0.942776	0.519309
rhmT	1.518	0.239282	14.6412	0.196618	0.919485	0.519545
cycA	1.272	0.33255	15.498	0.257157	0.745455	0.520489
acrD	1.3705	0.268079	15.2053	0.23929	0.836177	0.520703
sstT	1.71	0.602791	14.7048	0.512128	1.03281	0.521395
sapA	1.522	0.255926	14.7239	0.212553	0.957671	0.526735
yhiD	1.405	0.266189	15.0032	0.193488	0.846537	0.528495
yphD	1.4255	0.224549	14.6466	0.196184	0.897789	0.529578
sgcA	1.516	0.264113	14.5146	0.195128	0.949534	0.53081
yfeH	1.328	0.327248	15.8468	0.244235	0.803514	0.530814
yoaE	1.2725	0.506494	15.1263	0.4389	0.781381	0.532976
dcuD	1.415	0.230048	14.4464	0.204184	0.881913	0.533509
macB	1.438	0.868784	14.941	0.826668	0.905944	0.534273
ccmC	1.4225	0.224023	14.1659	0.216069	0.908287	0.535931
phoR	1.475	0.53886	15.9976	0.503195	0.863431	0.536667
dgoT	1.432	0.340682	16.1408	0.275765	0.847732	0.537549
yidE	1.355	0.333596	16.3863	0.273944	0.782711	0.538474
yojI	1.414	0.256578	16.1388	0.206971	0.854309	0.541205
mtlA	1.2495	0.345941	16.5978	0.271175	0.730944	0.541279
yhjX	1.36275	0.318568	15.8211	0.240213	0.80296	0.543138
cusA	1.5425	0.800602	15.9949	0.826974	0.915447	0.543698
mscS	1.52	0.511515	15.6343	0.417578	0.922532	0.545273
frwD	1.5165	0.340668	15.4332	0.246615	0.944925	0.546529
mgtA	1.362	0.246185	14.8696	0.172651	0.903314	0.548227
mdtH	1.3895	0.299105	15.2848	0.333844	0.838108	0.551267
mngA	1.356	0.297313	16.408	0.272844	0.789375	0.553123
yihO	1.3685	0.314303	15.5677	0.257676	0.798373	0.555188
zntB	1.3365	0.321129	15.9586	0.240574	0.824493	0.555716
cysP	1.4765	0.242444	16.0045	0.207457	0.890522	0.555972
cmtB	1.5015	0.214812	15.2013	0.181374	0.916169	0.557477
hsrA	1.394	0.518747	15.4187	0.436701	0.827764	0.560311
dtpD	1.461	0.448497	16.6766	0.356372	0.879616	0.561559
yehW	1.4155	0.440939	15.8844	0.458362	0.875371	0.562457
ygcS	1.3685	0.370725	16.7462	0.310756	0.796969	0.563699
gsiC	1.602	0.25087	15.5473	0.236278	0.996548	0.563954
cydD	1.3445	0.278397	15.737	0.214099	0.812918	0.564248
potB	1.518	0.274591	15.5638	0.237448	0.923852	0.564814
sbp	1.646	0.527359	14.699	0.420687	1.04153	0.565926
wt	1.694	1.47483	17.5017	1.02971	0.954914	0.566706
sgcB	1.371	0.291303	16.3418	0.225825	0.833872	0.56678
artQ	1.67	0.58785	16.5763	0.537401	1.01105	0.568055
ddpF	1.2605	0.443178	17.4251	0.355889	0.731647	0.568292
nupG	1.466	0.275309	15.769	0.225607	0.895159	0.570434
ascF	1.464	0.243762	15.4013	0.201762	0.900515	0.572016
ybjL	1.5045	0.461293	16.6574	0.4159	0.908891	0.572407
malF	1.2835	0.30064	15.5704	0.223882	0.743205	0.575622
ydiM	1.4845	0.427832	16.7329	0.36751	0.909109	0.575743
gntU	1.4935	0.321907	17.4018	0.256939	0.896016	0.575789
zupT	1.408	0.539491	17.0487	0.41771	0.842027	0.576803
ghxP	1.442	0.470997	16.155	0.387617	0.857888	0.57695
ydcT	1.4155	0.315357	15.8344	0.239403	0.889081	0.577062
yqeG	1.457	0.322056	16.5771	0.265138	0.88428	0.577312
yadS	1.5605	0.367881	16.4605	0.338563	0.949306	0.580085
yohK	1.262	0.28264	15.1261	0.236919	0.759294	0.581173
glpT	1.2375	0.431369	16.62	0.380832	0.713181	0.583337
frwB	1.4985	0.329127	16.3811	0.235837	0.926192	0.585456
sdaC	1.408	0.355838	16.8493	0.356704	0.833467	0.588004
ydcZ	1.606	0.464479	17.2609	0.403551	0.965125	0.591111
arsB	1.6125	0.886802	17.6089	0.733325	0.938661	0.591927
treB	1.446	0.307905	17.2051	0.254526	0.876158	0.593249
gltS	1.397	0.30234	16.8302	0.22699	0.847184	0.593424
yghD	1.375	0.41015	16.7452	0.324064	0.82913	0.595006
yrbG	2.0975	0.329998	17.0568	0.261484	1.24789	0.596132
yfcJ	1.416	0.505481	16.7885	0.512614	0.883777	0.596721
agaC	1.4595	0.283909	17.0148	0.225347	0.904378	0.597274
yhgE	1.403	0.308086	16.4964	0.22084	0.843914	0.599032
ynfA	1.2665	0.567856	14.7312	0.802316	0.852859	0.599731
ybiT	1.4405	0.336655	17.5357	0.28471	0.845378	0.600486
xanP	1.4325	0.300251	17.3612	0.226806	0.876368	0.603036
ptsP	1.438	0.409277	17.4291	0.332075	0.865693	0.604301
yifK	1.503	0.602156	18.0287	0.505235	0.874313	0.611774
proP	1.403	0.391049	18.9533	0.319659	0.80835	0.612257
agaV	1.49	0.313169	17.8227	0.261592	0.901342	0.614966
mdtJ	1.574	0.492606	18.1001	0.47003	0.952801	0.616722
nirC	1.485	0.353945	17.7057	0.300962	0.889049	0.617279
yfdV	1.4885	0.598553	17.4955	0.636763	0.900791	0.617858
ybhS	1.4115	0.478596	16.9625	0.47966	0.920195	0.618021
ydhJ	1.613	0.927976	17.8972	0.854551	0.989327	0.62017
ybjJ	1.4605	0.535841	18.0678	0.447933	0.883738	0.620697
ybhG	1.4175	0.530696	17.9529	0.519766	0.845798	0.621376
ydcU	1.52375	0.473546	18.3575	0.373058	0.902809	0.621391
ybaE	1.519	0.351678	17.6535	0.278069	0.91745	0.622314
mtr	1.3815	0.430658	18.7881	0.384973	0.811812	0.623153
barA	1.485	0.454511	17.9421	0.458477	0.894034	0.626053
gudP	1.3905	0.387662	17.2979	0.292803	0.854365	0.626789
yicJ	1.4465	0.431155	18.8476	0.330395	0.871092	0.627055
mscM	1.4075	0.425311	18.3594	0.349403	0.818069	0.628042
ygaY	1.4435	0.308633	18.0141	0.230563	0.853285	0.628208
perM	1.573	0.351505	16.7277	0.292057	0.987709	0.62895
lldP	1.4815	0.397464	18.1668	0.323164	0.873071	0.629913
yaaJ	1.478	0.458655	18.1052	0.406789	0.913456	0.631683
fryB	1.4405	0.360556	18.1951	0.276186	0.868916	0.632464
ydhP	1.3885	0.573193	17.7868	0.588706	0.895065	0.634884
ybhN	1.477	0.454578	18.7816	0.40499	0.912436	0.637193
yphF	1.607	0.400986	18.6662	0.354669	0.975464	0.638229
emrB	1.399	0.370344	18.1448	0.333203	0.822165	0.639727
entS	1.45	0.422204	19.2515	0.32412	0.859853	0.643603
nagE	1.5405	0.283664	17.0941	0.250533	0.985022	0.643811
potH	1.521	0.641228	18.4838	0.558249	0.908618	0.645544
livH	1.5665	0.348281	18.2638	0.291672	0.952762	0.646
ybbW	1.454	0.319546	17.7829	0.278776	0.898461	0.646186
rcnA	1.455	0.583574	18.715	0.476916	0.886742	0.648575
phnD	1.4925	0.385569	18.6729	0.302545	0.910629	0.65083
exbD	1.4065	0.475872	19.1391	0.409619	0.806057	0.651666
gabP	1.3735	0.494435	19.2545	0.417801	0.815338	0.654135
dctA	1.4265	0.490949	18.6298	0.428564	0.866005	0.654299
ycaD	1.5545	0.425152	18.8689	0.417825	0.946937	0.654853
ygbN	1.5505	0.319086	18.5355	0.288394	0.960144	0.655781
nikC	1.4855	0.370349	19.1635	0.296369	0.904465	0.65911
livK	1.456	0.397803	18.4352	0.30449	0.89477	0.661847
yejB	1.4155	0.593874	17.9008	0.597348	0.909374	0.662296
mdlB	2.309	0.395308	19.993	0.286388	1.35046	0.665051
sgcC	1.5085	0.389984	19.1295	0.282183	0.914777	0.671936
ygdQ	1.6355	0.524873	18.775	0.497207	1.02007	0.673102
crr	1.622	0.408544	19.151	0.321615	0.972033	0.673449
thiP	1.6835	0.334962	19.4722	0.282536	1.03238	0.673503
ybaL	1.4285	0.585152	16.943	0.599157	0.987558	0.674374
yheS	1.4785	0.369165	19.0234	0.280942	0.913921	0.680109
dauA	1.45	0.48525	20.6406	0.409385	0.860973	0.689608
yggT	1.4855	0.538654	18.9562	0.453533	0.939121	0.694603
rhtA	1.5945	0.528329	20.3502	0.433783	0.973674	0.695966
araH	1.5415	0.368538	19.469	0.338227	0.943462	0.700247
yeeE	1.5145	0.368583	18.97	0.295236	0.903746	0.703365
dppB	1.536	0.386705	20.5158	0.317026	0.938085	0.705092
cvrA	1.558	0.490449	21.8318	0.389722	0.89199	0.70798
yddG	1.4605	0.411466	20.7904	0.414514	0.88231	0.712233
ddpD	1.5135	0.393428	19.7112	0.299013	0.922174	0.714088
ydiN	1.5265	0.442992	20.1863	0.362117	0.961399	0.714948
ydjX	1.5845	0.428944	20.368	0.349978	0.955166	0.72011
yddB	1.588	0.402258	19.6627	0.284023	0.997875	0.721663
atpB	1.567	0.442226	21.0932	0.354524	0.955516	0.730713
yccA	1.5405	0.426331	19.3042	0.367055	0.98582	0.730927
ygaZ	1.4975	0.581289	18.4987	0.56324	1.0878	0.73474
cmtA	1.5435	0.412458	20.8385	0.357947	0.948255	0.736987
kgtP	1.516	0.466798	21.2873	0.376958	0.880195	0.738593
pitA	1.5055	0.462049	20.3803	0.359582	0.928408	0.7542
ydfJ	1.581	0.553319	23.1581	0.407815	0.926474	0.761066
yhdW	1.575	0.480709	22.065	0.342129	0.950355	0.76456
yraQ	2.0675	0.810277	24.4602	0.750131	1.23297	0.872803
yiaM	2.513	0.509403	26.8776	0.421352	1.50288	0.90045
argO	1.9205	0.939729	27.2974	0.777225	1.1652	0.974569

## Sheet: Cefoperazone
Strain	MaxOD	Rate	AUC	Normalized MaxOD	Normalized Rate	Normalized AUC
mscK	0.148784	0	0	0	0.0893969	0
tatC	0.0904257	0	0	0	0.0535221	0
tolQ	0.044914	0	0	0	0.0282938	0
ybjJ	0.011462	0	0	0	0.00693556	0
ycaD	0.00267649	0	0	0	0.00163041	0
ydcS	0.114505	0	0	0	0.0683489	0
ydjE	0.0475915	0	0	0	0.0305484	0
ygdQ	0.0771445	0	0	0	0.0481155	0
yggT	0.080793	0	0	0	0.0510767	0
yccS	0.0817069	1.22789	0.115294	0.963036	0.050519	0.0042217
ybiO	0.104607	1.28305	0.157321	1.40026	0.0690422	0.00611309
kdpA	0.233915	1.23942	0.215687	1.01675	0.141468	0.00771495
proW	0.0558726	0.000182477	0.232158	0.000226053	0.0345464	0.00908074
sapD	0.120902	1.64165	0.425996	1.8116	0.0754469	0.017261
ygaZ	0.254557	1.19505	0.509926	1.15794	0.184913	0.0202535
gltK	0.158621	6.32508e-06	0.580206	5.27927e-06	0.0984722	0.0214645
guaB	0.0791772	1.60608	0.613957	1.75368	0.0481381	0.0217007
nhaB	0.137974	0	0.613757	0	0.0852873	0.0220288
argO	0.144191	0.0325413	0.650273	0.026914	0.0874829	0.023216
yccA	0.0946797	0	0.698538	0	0.0605888	0.0264491
ybhG	0.157386	0.792195	0.767403	0.77588	0.0939093	0.0265609
yfdV	0.125888	0.0320928	0.758709	0.0341415	0.0761831	0.026794
ynfA	0.115631	0.0311803	0.736491	0.0440542	0.0778658	0.0299837
ansP	0.169818	0.524562	0.900458	0.49601	0.100953	0.030059
cusA	0.225852	0.50711	0.902208	0.523815	0.134039	0.0306678
ddpB	0.155547	0.0289244	1.01468	0.0296583	0.0942316	0.0362475
potH	0.119993	0.0574516	1.14777	0.050017	0.0716817	0.0400857
ccmC	0.147969	0	1.0622	0	0.0944801	0.0401857
cmtA	0.17257	1.84383	1.16927	1.60015	0.106019	0.0413531
pstC	0.199805	0.027087	1.20214	0.0253736	0.118593	0.041561
phoR	0.199381	0.0681224	1.28301	0.0636136	0.116713	0.0430407
mdfA	0.227912	1.47617	1.21745	1.1918	0.144904	0.0459987
yihN	0.488052	1.08177	1.35551	0.921345	0.284155	0.0467477
rhtA	0.493599	1.7027	1.47157	1.398	0.301414	0.0503267
corA	0.234073	0	1.45052	0	0.137193	0.0526877
glvB	0.246787	0.0501712	1.51456	0.0478684	0.144526	0.052922
acrB	0.222761	0.0391215	1.46131	0.0323033	0.132808	0.0533189
artI	0.413888	0.465787	1.53931	0.362625	0.241785	0.0533942
lplT	0.463834	0.340944	1.51961	0.3633	0.287039	0.0540871
ydcU	0.178582	0.0651709	1.60136	0.0513415	0.105809	0.0542052
ddpD	0.370063	1.00257	1.49935	0.761972	0.225479	0.0543175
cynX	0.65578	1.09766	1.49191	1.01536	0.39737	0.0544091
potB	0.31447	1.74886	1.50542	1.5123	0.191386	0.0546319
ybbP	0.234319	0.0467246	1.68804	0.0404159	0.136768	0.0565359
ybhF	0.31461	0	1.79609	0	0.180956	0.0608732
yeeO	0.208635	0	1.87336	0	0.124162	0.0629645
ybbA	0.249582	1.4009	1.72492	1.28262	0.152422	0.0631713
yfcJ	0.369142	1.79523	1.78446	1.82057	0.230395	0.0634259
mhpT	0.40302	1.28645	1.96156	0.884503	0.233179	0.0648628
yraQ	0.354985	1.35371	1.83322	1.25322	0.211698	0.0654142
uup	0.407883	0.650531	1.79544	0.618053	0.253551	0.0665365
sapB	0.230233	1.34549	1.73682	1.35662	0.148426	0.0677402
ydhP	0.318318	0	2.02001	0	0.205196	0.0721023
murP	0.427961	0.685245	2.06277	0.601253	0.260682	0.0722484
yifK	0.299382	0.63284	2.14545	0.53098	0.174154	0.0728025
sapC	0.340816	0.526693	1.90701	0.547963	0.204897	0.0734574
copA	0.30816	0.887987	2.06324	0.770514	0.186398	0.0754152
fieF	0.330975	1.31877	2.26569	1.01331	0.193272	0.0778791
dcuD	0.69193	0.834317	2.11807	0.740517	0.431252	0.0782206
yaaJ	0.586519	1.49592	2.26416	1.32676	0.362489	0.0789957
mdtG	0.641936	0.561559	2.29555	0.537632	0.387691	0.0793875
cmtB	0.755832	0.60341	2.16711	0.509482	0.461185	0.0794741
aqpZ	0.396398	0.555042	2.28003	0.497926	0.232546	0.0810765
glnP	0.322985	2.94846e-05	2.38431	2.78064e-05	0.195113	0.0813823
ssuC	0.574071	0.423922	2.14906	0.361981	0.39403	0.0823351
dsdX	0.524345	0.92113	2.29761	0.870188	0.306903	0.082564
potE	0.759843	1.11163	2.33149	0.943527	0.472659	0.0837489
yddB	0.609441	0.785303	2.30511	0.554481	0.382963	0.0846021
ghxQ	0.668845	0.424961	2.34007	0.357082	0.407433	0.0848977
yddG	0.396994	1.97037	2.48021	1.98496	0.23983	0.0849664
chaA	0.331191	0.0436239	2.23993	0.0433084	0.2109	0.0861469
rutG	0.422801	0	2.48527	0	0.258806	0.0865525
uidB	0.813763	1.34629	2.51811	1.06553	0.491827	0.0879975
garP	0.540097	0.926216	2.6426	0.861678	0.312962	0.0898335
yneE	0.488761	0.210617	2.42617	0.19094	0.312569	0.0901416
ytfF	0.430437	1.43344	2.63732	1.19842	0.264113	0.0942159
entS	0.490144	1.88165	2.94464	1.44452	0.290656	0.0984432
nikC	0.450273	1.564	2.86493	1.25157	0.274154	0.0985365
hisM	0.515174	0.175412	2.85597	0.154603	0.307283	0.100508
mdtL	0.360253	1.95567	2.82313	1.82939	0.215037	0.101732
yehW	0.490753	1.71565	2.89194	1.78344	0.303491	0.102402
arnE	0.623327	0.19538	2.83622	0.216911	0.382315	0.103821
ycjV	0.821376	0.865079	2.72901	0.742827	0.516112	0.104705
dgoT	0.719607	0.178616	3.19824	0.14458	0.426001	0.106513
yhdP	0.507527	0.184484	3.26304	0.153175	0.295535	0.108827
ddpC	0.270517	0	2.98868	0	0.168972	0.109497
focA	0.709145	0.32141	3.08647	0.271351	0.430154	0.109782
yejB	0.60783	0.174366	2.97859	0.175386	0.390495	0.110202
yajR	0.755278	0.268565	3.02168	0.236107	0.474905	0.112922
mdtJ	0.553927	1.84972	3.38852	1.76494	0.335313	0.115457
fetA	0.899393	0.693387	3.23261	0.636697	0.547514	0.11621
yadI	0.657186	0.798008	3.15109	0.759324	0.42959	0.116397
fepD	0.907558	1.4648	3.3294	1.28096	0.569562	0.119888
ytfL	0.814915	0.462441	3.4235	0.37401	0.479311	0.121076
rarD	0.785039	0.485763	3.4192	0.339532	0.476421	0.122846
gsiC	0.652434	0.457293	3.42589	0.430694	0.405856	0.124269
xanQ	0.912028	0.52175	3.48865	0.502983	0.557411	0.128606
dtpB	0.421199	1.88732	3.77691	1.58605	0.253073	0.130019
mdtI	0.637023	0.489688	3.6157	0.509606	0.368835	0.131802
xylH	0.654571	0.354253	3.59296	0.294521	0.404981	0.133202
rbsC	0.692867	0.912754	4.09891	0.745777	0.405509	0.134018
pheP	0.819088	0.221708	4.10607	0.177862	0.482017	0.136012
tsgA	0.89	1.01089	4.01292	0.797072	0.524096	0.138256
livK	0.777446	1.02283	3.93753	0.782903	0.477772	0.141362
lptB	0.872725	0.914456	3.78012	0.765515	0.541398	0.1415
ypjA	0.823972	0.896334	3.94887	0.77331	0.498623	0.142453
kch	0.600824	0.859794	4.1371	0.78153	0.360357	0.145481
yhbE	0.621595	2.02593	4.03074	1.66815	0.383754	0.145949
yjhF	0.755857	0.956693	4.14851	0.859254	0.461377	0.147925
ybjL	0.865072	0.321299	4.31708	0.289682	0.522603	0.14835
mscL	0.815334	0.402313	3.89211	0.360109	0.503389	0.148995
yphD	0.824033	1.21429	4.1278	1.0609	0.518981	0.149249
adiC	0.775403	0.786433	4.35125	0.66667	0.445651	0.149253
yfeH	0.449181	4.80986	4.47251	3.58974	0.271779	0.149814
yphF	0.512492	0	4.43889	0	0.311087	0.151774
atoE	0.960255	1.34463	4.19075	1.11265	0.590796	0.155704
leuE	0.580806	1.9464	4.55229	1.727	0.354544	0.156137
cvrA	1.06899	0.108989	4.93789	0.0866049	0.612022	0.16013
fryA	0.742591	0.613176	4.36029	0.471032	0.467094	0.160143
wzxE	0.798417	1.14945	4.5341	0.970951	0.481482	0.160212
mtr	1.03697	0.193755	4.87161	0.173201	0.609358	0.161579
zupT	0.738125	1.76893	4.95142	1.36962	0.441422	0.167519
araJ	1.01552	1.1203	4.69617	0.914975	0.621033	0.167934
oppB	0.601406	0.505321	4.51308	0.48951	0.370392	0.168001
zitB	1.06243	0.201199	4.86062	0.172708	0.647572	0.169856
yicJ	1.12714	0.491324	5.10594	0.376503	0.678772	0.169873
yfbS	0.850565	0.954566	4.80145	0.818497	0.5195	0.170099
torT	1.22829	0.380772	4.6558	0.319907	0.769288	0.173124
artJ	0.547228	2.11213	4.65296	1.87732	0.370741	0.173553
ascF	0.723042	0.227902	4.71138	0.188635	0.444747	0.174984
sgcB	1.21903	0.200678	5.11427	0.15557	0.741439	0.177378
ettA	1.02126	0.19186	5.21605	0.138635	0.59883	0.177909
yegT	1.00285	0.681927	5.18742	0.625634	0.589534	0.180539
plaP	0.809309	0.349104	5.174	0.26908	0.494587	0.180676
agaV	0.910738	0.965808	5.24628	0.806746	0.550931	0.181021
rhaT	1.23777	0.538908	5.56963	0.432506	0.716147	0.183957
fucP	1.04953	0.456251	5.639	0.408169	0.614064	0.184455
yqcE	0.643974	2.1122	5.36581	1.89827	0.393589	0.1852
yhiD	0.878058	0.159028	5.28016	0.115595	0.529045	0.185996
mdtD	0.808146	1.28126	5.35272	1.13926	0.497759	0.186738
nagE	1.13578	0.629418	4.97589	0.555905	0.726234	0.187406
lldP	0.848546	1.19232	5.40491	0.969434	0.500062	0.18741
yrbG	0.82967	0.850411	5.40903	0.673849	0.493603	0.189044
acrD	0.947111	0.76142	5.52101	0.679653	0.577857	0.189066
ydhJ	0.949351	0.530687	5.54935	0.488697	0.582281	0.192294
ybhN	0.86699	1.22458	5.67816	1.091	0.535595	0.19264
ybbY	0.732624	1.15705	5.52197	1.03265	0.448333	0.193893
tdcC	0.942719	0.917143	5.64201	0.758413	0.55646	0.194122
yehY	0.898087	1.47113	5.69759	1.23804	0.545782	0.195269
galP	0.898027	0.0908901	5.95929	0.0737475	0.510959	0.197273
atpB	0.756775	0.763162	5.70395	0.611813	0.461462	0.197597
hofC	0.868151	0.51985	5.83458	0.406248	0.512735	0.198211
mdtH	1.08507	0.925038	5.5128	1.03247	0.654483	0.198827
ybiR	0.85257	1.46846	5.9472	1.25253	0.511512	0.19921
treB	1.09373	0.754596	5.84208	0.623778	0.662709	0.201441
ptsP	0.728282	1.70117	5.83604	1.38028	0.438434	0.202347
btuC	0.924711	1.13256	5.81578	1.1329	0.557853	0.204148
glvC	0.904432	0.548067	5.91809	0.466847	0.52651	0.205242
kdgT	0.967263	1.35909	5.99915	1.10813	0.595512	0.206891
ynjB	0.83319	0.618812	5.70758	0.470958	0.507689	0.206926
hsrA	0.825132	0.557708	5.7644	0.469501	0.489967	0.209476
yddA	1.413	0.825472	6.10242	0.642866	0.829284	0.21009
ghxP	0.692263	1.94983	5.88316	1.60465	0.411847	0.210108
yhdZ	0.950037	0.989309	6.3337	0.863158	0.554292	0.210447
puuP	0.893082	0.624661	5.96639	0.517389	0.541073	0.210867
panF	1.06274	1.11085	6.27769	0.864096	0.622449	0.2111
tolR	0.641668	2.47183	5.95759	2.14111	0.406487	0.21177
mdtK	1.0119	1.10837	6.07586	1.28661	0.617813	0.21179
nupX	1.17989	0.179946	6.25317	0.166483	0.717289	0.215729
ptsG	1.42571	0.906164	6.18811	0.80411	0.857678	0.217008
yjeH	1.10105	0.300251	6.18127	0.249849	0.655611	0.21713
zntB	0.769646	2.53767	6.24295	1.9011	0.474798	0.217394
exbB	1.18645	0.369677	6.82437	0.309794	0.676847	0.219857
yejE	1.09248	1.02837	6.57309	0.923984	0.660712	0.22098
frwB	1.19542	1.24174	6.31319	0.889767	0.738866	0.225632
ydiM	0.966199	1.08464	6.57931	0.931714	0.591701	0.22638
tyrP	0.890781	0.499844	6.52573	0.416645	0.541792	0.227269
sgcA	1.25812	0.309089	6.27248	0.228357	0.788014	0.22939
mscS	1.30168	0.732608	6.60843	0.598068	0.790026	0.23048
alx	0.88984	1.01683	6.73125	0.786355	0.535301	0.23439
emrB	0.96979	0.513078	6.66481	0.461623	0.569927	0.234979
ydjX	0.929514	0.669336	6.67595	0.546114	0.560329	0.236028
mltF	1.07268	0.931335	6.89153	0.744278	0.649569	0.238404
argT	0.792661	0.136114	6.58266	0.129786	0.540785	0.239493
fryC	1.25942	0.301342	7.19083	0.3203	0.747628	0.240041
ynjD	0.830092	0.288197	6.63502	0.252113	0.504034	0.240367
cadB	1.33672	0.360765	6.76463	0.312859	0.824236	0.242155
ttdT	1.10079	0.707117	6.89205	0.558372	0.678473	0.242245
ygjI	0.900246	1.21102	6.86001	0.934761	0.541282	0.242327
ydjK	1.19787	0.865646	6.9969	0.882757	0.717784	0.24264
yebQ	0.530984	1.77277	6.0338	2.67469	0.338412	0.242896
yahN	1.0498	0.866652	7.23638	0.631776	0.626841	0.242952
gltS	0.877528	2.33984	6.89196	1.75671	0.53216	0.243007
ykgG	1.22489	0.929552	6.71791	0.730519	0.753862	0.246175
betT	0.971832	1.27732	7.23945	1.15241	0.567094	0.247158
adeP	1.18656	0.346194	7.23742	0.285229	0.688787	0.249893
yphE	1.50793	0.578909	7.11317	0.52988	0.886628	0.249971
gadC	1.25018	0.894428	7.39325	0.817402	0.742296	0.250042
ycaM	0.854895	0.954317	7.38282	0.776632	0.507632	0.250147
nimT	1.11857	0.827472	7.16388	0.634443	0.658776	0.251266
ygaH	1.03357	1.7365	7.83158	1.47637	0.602448	0.251441
yjfF	1.07813	0.997404	6.58658	1.08946	0.654928	0.252123
yhhT	1.32152	0.459869	7.47478	0.316818	0.796735	0.253883
xanP	1.26502	0.280829	7.42913	0.212134	0.773909	0.258049
atoS	1.13068	0.115642	7.68842	0.113176	0.646981	0.258652
idnT	1.02115	1.19625	7.71318	1.05301	0.593561	0.259006
yjeM	0.926148	1.19857	7.37457	0.972092	0.572582	0.259504
uraA	0.922043	1.09261	7.47377	1.0968	0.57086	0.260083
rhtC	1.38338	0.223327	7.42486	0.159988	0.838335	0.260585
yhgE	1.37646	0.25937	7.20175	0.18592	0.827952	0.261516
ygaY	1.06301	2.27414	7.52814	1.69889	0.62837	0.26253
ybiT	1.32925	0.42582	7.7305	0.360116	0.780089	0.264721
mngA	1.37721	0.777222	7.86067	0.713258	0.801722	0.264987
yedA	1.23074	0.275453	7.5074	0.246702	0.746361	0.266663
ydiK	0.891462	0.721502	7.74486	0.612162	0.541799	0.267199
feoB	1.10316	0.421108	7.35211	0.311832	0.676856	0.26755
artQ	1.35008	0.567454	7.80807	0.518755	0.817362	0.267577
yicG	1.30916	0.469395	8.02123	0.370641	0.769462	0.26902
ygcS	1.43544	0.458162	8.01583	0.384048	0.835954	0.269822
yihO	1.4149	0.570693	7.57896	0.467872	0.825445	0.270288
glpT	1.00669	0.382228	7.84759	0.337448	0.580163	0.275439
fetB	1.21426	0.850449	7.52054	0.681884	0.747083	0.27551
dcuB	1.38246	0.304781	7.92216	0.247133	0.823459	0.275971
ybaT	1.3782	0.531702	7.68456	0.474681	0.848759	0.277005
yidE	1.40113	0.400105	8.48952	0.328559	0.809359	0.278975
putP	0.962686	0.289364	8.20314	0.281436	0.571919	0.279289
cydD	1.01772	0.446271	7.80273	0.343202	0.615338	0.279766
ydcO	0.844566	0.439734	7.69001	0.379689	0.528554	0.285832
yoaE	1.20387	0.962867	8.12415	0.834369	0.739237	0.286254
ydjN	1.34769	0.733155	8.4055	0.631862	0.785989	0.287076
yhhS	1.01584	0.667598	8.15396	0.511178	0.616811	0.288086
frlA	1.18489	0.678872	8.2259	0.537237	0.72453	0.288334
srlA	1.16162	1.14685	7.91112	0.976761	0.702581	0.289168
yfcC	1.48155	0.820155	8.37436	0.731827	0.900905	0.289262
yjiJ	1.20511	0.261634	8.41367	0.206733	0.702564	0.289342
ydiN	0.902879	1.38852	8.18232	1.13503	0.568639	0.289798
ydeE	0.903147	1.70296	8.3108	1.42402	0.551992	0.293257
sapA	0.918408	0.467447	8.19982	0.388227	0.57788	0.293341
barA	1.15279	0.952923	8.41347	0.961238	0.69403	0.293571
sbp	0.939753	1.38494	7.67257	1.1048	0.59464	0.295401
ptsN	0.928084	0.744069	7.85341	0.755464	0.589616	0.296811
mdlA	1.28611	0.56696	8.37321	0.482544	0.786479	0.298137
livJ	1.17721	0.39065	8.57228	0.372054	0.687736	0.299958
mdtB	1.28473	0.660974	8.99968	0.521793	0.762839	0.300409
glpF	0.914531	1.06711	8.60277	0.888472	0.556941	0.300841
ydcV	1.03935	1.15773	8.60138	0.899921	0.630821	0.302297
mlaE	1.02239	1.34244	8.21319	1.03332	0.614022	0.302758
rcnB	1.41513	0.542858	8.49163	0.39946	0.875289	0.302925
frvB	1.39632	1.03252	8.66721	0.778252	0.828196	0.304614
ugpA	1.32993	0.444525	9.03561	0.367634	0.800771	0.304752
brnQ	0.828965	1.12117	8.36784	0.935941	0.506276	0.305914
aroP	1.3756	0.806862	8.59522	0.691487	0.833059	0.307741
sapF	1.38009	0.265315	8.75801	0.221877	0.855702	0.308511
yghE	0.898635	0.604246	8.41055	0.475629	0.541576	0.30854
dinF	1.34291	0.7286	8.79665	0.569056	0.801719	0.309499
yheS	1.2697	1.57686	8.67078	1.20003	0.784855	0.309991
gdx	1.10937	1.64088	8.47671	1.34852	0.683249	0.311196
ygiS	1.52909	0.506064	9.00833	0.38419	0.937283	0.311769
yadH	1.54412	0.662759	9.02561	0.531861	0.920199	0.312584
pitA	1.01089	1.3982	8.55794	1.08812	0.623391	0.316697
actP	1.24808	0.500932	8.91809	0.381152	0.725266	0.316847
lysP	1.47523	0.492666	9.29632	0.42776	0.876818	0.318603
ygbN	1.43451	0.409388	9.01899	0.370011	0.88832	0.319089
nepI	1.5022	0.734397	9.49499	0.605477	0.882122	0.320906
ampG	1.29703	1.0078	9.18102	0.916062	0.773522	0.32207
mdtF	1.32103	0.617387	8.80652	0.535587	0.813063	0.322304
modF	1.32306	0.301645	8.8377	0.25435	0.815458	0.32238
sdaC	1.21926	0.533068	9.25984	0.534365	0.721743	0.323149
yiaV	1.14477	0.0961027	9.54737	0.0784735	0.679869	0.323654
mtlA	1.44433	0.224948	10.0232	0.176331	0.84492	0.326872
citT	1.26851	0.633013	8.97959	0.615252	0.776824	0.328278
gudP	1.56579	0.296397	9.07655	0.22387	0.962067	0.328888
tqsA	1.38562	0.69659	9.70024	0.631847	0.839782	0.32889
araE	1.22677	1.02528	9.67591	0.875686	0.734752	0.330924
bglF	1.34358	0.510086	10.1311	0.396679	0.756714	0.330987
frwD	1.36232	0.689264	9.37617	0.49897	0.848853	0.332033
yiaN	1.13758	1.04368	9.15105	0.820092	0.696856	0.332229
yijE	1.45504	0.84259	9.53518	0.69605	0.884315	0.332288
atpI	1.19539	0.99341	9.71349	0.754388	0.708409	0.334076
dlsT	1.01238	0.789973	9.64149	0.552246	0.61636	0.336335
malX	0.99145	1.28201	9.36453	1.00966	0.622893	0.338187
gabP	1.36338	0.600602	10.017	0.507513	0.809332	0.340308
yeeA	1.41807	0.385738	9.91028	0.315787	0.82319	0.340923
yhjV	1.21768	0.970046	9.46945	0.74887	0.732585	0.341379
ynjC	1.11644	1.6551	9.75605	1.26694	0.677005	0.341663
narK	1.41896	0.60838	9.68032	0.556669	0.847499	0.34181
amtB	1.06022	0.880995	9.58012	0.784914	0.652942	0.343624
ybhR	1.39485	0.523086	9.40042	0.44409	0.827659	0.347028
dauA	1.19869	0.170756	10.4178	0.144059	0.711749	0.34806
thiP	1.4536	0.726898	10.1166	0.613128	0.891402	0.349913
cysP	1.30526	0.569031	10.0759	0.486913	0.78724	0.350023
livH	1.31289	0.360295	9.91794	0.301734	0.798515	0.350802
adeQ	1.14925	0.485261	9.67525	0.353066	0.704393	0.353828
ydgI	1.01305	1.91209	10.5386	1.42686	0.605716	0.358656
chbC	1.37142	0.911046	9.83119	0.760813	0.863178	0.35911
crr	1.60638	1.0843	10.2458	0.853585	0.962674	0.360296
ynfM	1.12585	1.42696	10.5103	1.25082	0.690949	0.360503
ybbW	1.51701	0.516475	9.96336	0.45058	0.937395	0.362043
ybaE	1.46417	0.519715	10.2934	0.410934	0.884334	0.36286
setC	1.22532	1.36718	10.4802	1.27886	0.731462	0.363687
rcnA	1.41791	0.827579	10.5244	0.676325	0.864139	0.364725
setB	0.859766	0.534887	10.6278	0.507937	0.517431	0.364829
yhhJ	1.38979	0.483043	10.6887	0.352848	0.844495	0.365125
ydhK	1.58853	0.815569	10.5567	0.725039	0.951569	0.365679
yghF	1.47967	0.523106	10.3184	0.396413	0.89554	0.365837
yfjD	1.58963	0.327488	10.758	0.249232	0.962228	0.36616
ybhS	1.33759	0.453178	10.0938	0.454185	0.872009	0.367764
ptsI	1.36383	0.722916	10.6473	0.540329	0.774075	0.368897
frwC	1.4981	0.647984	10.639	0.503252	0.922916	0.375228
kdpD	1.38979	0.110209	10.6872	0.104352	0.827072	0.379243
setA	1.39673	1.07364	11.1005	0.903931	0.818064	0.382585
nlpA	1.47205	0.316386	10.7325	0.277937	0.866518	0.383072
bcr	1.53121	1.01411	10.8083	0.754464	0.917251	0.384775
yjhB	1.34959	0.617717	10.6936	0.49526	0.836735	0.385902
yggR	1.4984	0.528392	10.7258	0.422046	0.926747	0.386828
ydhC	1.51723	1.01491	11.3718	0.982763	0.925215	0.38741
yhjE	1.38396	0.56677	10.8255	0.497491	0.858962	0.38905
fsr	1.46297	0.784002	11.4992	0.655855	0.848907	0.389414
dppB	1.60821	0.442949	11.3334	0.363136	0.982185	0.389508
yhjX	1.30254	1.15969	11.4523	0.874447	0.767481	0.393156
proY	1.42621	0.872899	11.4811	0.685295	0.85079	0.393956
clcB	1.43782	0.934396	11.0877	0.723266	0.869279	0.395477
ycjO	1.55531	0.474986	11.2985	0.436907	0.964918	0.39877
ydcZ	1.48701	0.320773	11.6769	0.278695	0.89362	0.399882
eamA	1.04435	1.52574	11.0887	1.16155	0.615999	0.400921
ycjN	1.37969	0.542317	11.1635	0.440628	0.833044	0.403342
ycjP	1.45399	0.364753	11.9073	0.294323	0.865564	0.40411
nupG	1.56585	0.441806	11.1809	0.362047	0.956126	0.404463
yegH	1.41381	1.04467	11.3493	0.734468	0.876393	0.405027
lsrA	1.50582	0.762806	11.6811	0.646676	0.882991	0.406077
uhpC	1.69068	0.471694	12.0471	0.40619	1.00008	0.408275
dcuA	1.62387	0.612647	11.8235	0.504029	0.99839	0.409304
dtpD	1.55896	0.343608	12.1937	0.273028	0.938593	0.410604
yhdW	1.61132	0.690947	11.8748	0.491759	0.972268	0.411467
tnaB	1.71029	0.691652	12.7129	0.515643	0.988524	0.413406
lsrC	1.44793	0.859445	11.6956	0.778515	0.89289	0.413875
ybhI	1.52555	0.427321	12.2054	0.397951	0.919018	0.415454
psuT	1.63034	0.824334	11.9011	0.757283	0.992092	0.415468
sgcC	1.60919	0.860825	11.8426	0.622873	0.975839	0.41598
xapB	1.48956	0.687003	11.2223	0.596195	0.929756	0.417899
sotB	0.826013	1.29821	11.705	1.03173	0.507854	0.422173
eamB	1.68262	0.451266	12.6825	0.367538	1.00088	0.422734
arnF	1.46347	0.62453	11.7707	0.488433	0.898558	0.430233
yihP	1.69588	0.885624	12.8158	0.758279	1.0016	0.431775
yadG	1.32194	0.954341	11.334	0.749762	0.80623	0.432624
yjjP	1.5117	0.544126	12.4018	0.392275	0.887792	0.432878
yiaM	1.61089	0.928123	12.9445	0.767697	0.963378	0.433664
yadS	1.59624	0.453959	12.3332	0.417782	0.971046	0.434633
mdtO	1.64378	0.682957	13.4938	0.542735	0.920426	0.436629
hcaT	1.57743	0.904516	12.9467	0.724088	0.914725	0.437048
mdtN	1.56095	0.78992	12.7156	0.628816	0.921676	0.442992
yojI	1.6329	0.77788	13.501	0.627483	0.986562	0.452746
mlaC	1.34369	0.501878	13.4104	0.407531	0.802652	0.457955
yhfK	1.52596	0.665396	12.4463	0.570118	0.928762	0.461795
ybaL	1.43087	0.611732	11.6509	0.626372	0.989198	0.463734
ddpF	1.66	0.563043	14.372	0.452146	0.963535	0.468719
rbbA	1.57657	0.806928	13.3667	0.685791	0.941781	0.474068
kup	1.5289	0.501267	13.3123	0.379039	0.925225	0.476423
kefC	1.57317	0.974189	13.2376	0.816938	0.948171	0.482272
dctA	1.54142	0.601757	13.7778	0.525292	0.935773	0.483892
perM	1.5749	0.82128	12.8826	0.68238	0.988901	0.484376
ycfT	1.66899	0.441164	13.4733	0.382365	1.00052	0.486707
eutH	1.55865	0.360354	13.3226	0.322548	0.975325	0.487618
narU	1.7531	0.887757	14.6258	0.684011	1.02363	0.487866
yghD	1.51317	1.02902	13.7301	0.813042	0.912444	0.487871
yjbB	1.63455	0.532919	13.3948	0.475659	0.959086	0.488741
exuT	1.67849	0.359419	14.261	0.290546	1.00247	0.489418
yfdC	1.598	0.843474	14.5724	0.65458	0.952506	0.489701
dtpC	1.63006	0.920427	14.7799	0.653355	0.951456	0.490816
mglC	1.58089	0.668588	13.9647	0.625545	0.970431	0.495718
lacY	1.74376	0.770955	15.3236	0.633313	0.989116	0.495822
yidK	1.50576	0.868894	14.8521	0.632053	0.881732	0.496618
yaaU	1.56899	0.681958	13.7154	0.578946	0.974999	0.499257
tehA	1.63938	0.592269	13.947	0.618716	0.97418	0.499896
malF	1.58774	0.623684	13.5376	0.464448	0.919376	0.500471
dcuC	1.57805	0.644374	14.5755	0.55279	0.956134	0.501239
fruA	1.63326	0.872195	14.0428	0.712465	0.99089	0.501246
melB	1.57369	0.337164	14.8317	0.289019	0.923866	0.501406
shiA	1.57758	1.22528	15.2332	0.864482	0.936395	0.50291
metI	1.59432	0.581445	13.7687	0.493413	0.943838	0.503474
dhaM	1.67229	0.986579	15.103	0.782353	0.997742	0.505961
znuB	1.63402	0.72341	14.7972	0.647344	0.972673	0.508602
mepM	1.70525	0.805631	15.1952	0.642797	0.997602	0.509715
ydfJ	1.43756	0.81285	15.5638	0.599099	0.842414	0.511487
araH	1.61027	0.757275	14.2293	0.694993	0.985553	0.51179
trkH	1.53451	0.345978	14.1798	0.254551	0.948978	0.512601
agaC	1.55325	1.05953	14.7483	0.84098	0.962472	0.517713
frvA	1.59979	0.63111	15.4138	0.454717	0.938174	0.517915
yhdX	1.53584	1.01946	14.8545	0.74277	0.943895	0.520258
yhdY	1.6216	0.759057	14.7365	0.623501	0.980666	0.520955
codB	1.61542	0.884281	14.7886	0.720318	0.957657	0.521558
fryB	1.60487	0.937287	15.0088	0.717964	0.968066	0.521707
cycA	1.58719	0.665791	15.5665	0.514849	0.930175	0.522789
clcA	1.5982	0.797449	14.2575	0.616623	0.982615	0.522896
caiT	1.58737	0.426912	15.0516	0.335094	0.959007	0.524709
sstT	1.62191	1.05069	14.8293	0.892658	0.979606	0.525811
yeaV	1.67824	0.900922	15.1827	0.763007	1.00942	0.526164
sufB	1.54281	0.788157	14.8931	0.568271	0.958204	0.527602
focB	1.58501	0.979365	15.1747	0.833371	0.963	0.528703
mdlB	1.64021	0.545853	15.9266	0.395454	0.959307	0.529787
phnL	1.69722	0.89353	14.9133	0.782569	0.999685	0.531718
dtpA	1.73548	0.712903	15.4808	0.781358	1.06042	0.538708
wt	0.864654	1.88662	16.6662	1.31722	0.487408	0.539652
yohK	1.57671	0.61914	14.061	0.518987	0.948641	0.540252
gntP	1.73135	0.387136	15.6886	0.304121	1.05278	0.543823
nanT	1.63045	0.722307	16.7861	0.592451	0.929168	0.545583
modB	1.51704	1.23051	15.3822	0.960456	0.939446	0.546878
phnD	1.59951	0.574688	15.7131	0.45094	0.975919	0.54767
gntU	1.56239	0.753905	16.591	0.601751	0.937345	0.548961
soxR	1.65017	0.513608	15.3785	0.410897	1.00597	0.550997
kgtP	1.70104	0.584337	15.9832	0.471876	0.987628	0.554562
emrY	1.6558	0.761492	16.0988	0.63311	0.978571	0.561097
acrF	1.71875	0.85407	16.4792	0.843758	1.01632	0.563622
rhmT	1.64069	0.666289	15.9039	0.547488	0.993802	0.564351
ytfT	1.53875	1.00187	16.0409	0.73025	0.944114	0.566525
yqgA	1.59023	0.700705	14.8878	0.57923	0.956826	0.566721
ydcT	1.5863	0.950916	15.6912	0.721886	0.996361	0.571843
kefB	1.38588	1.15817	15.9825	0.915982	0.862711	0.589125
yfeO	1.57986	0.865509	15.7126	0.666594	0.954534	0.589482
cysW	1.47725	1.2271	16.0169	1.06454	0.94173	0.589987
yjcE	1.68678	0.883474	17.4145	0.787894	0.955535	0.59123
uhpT	1.53624	0.853564	16.8535	0.643623	0.922827	0.594979
nirC	1.58161	0.510259	17.1069	0.433877	0.946888	0.5964
xylE	1.63659	0.721802	17.4343	0.602933	0.967373	0.602174
zntA	0.805096	0.788688	17.5321	0.687807	0.468972	0.608065
mgtA	1.47634	1.37601	16.6417	0.965001	0.979149	0.613565
yicL	1.64207	0.607638	18.3726	0.469236	0.958466	0.618247
alsC	1.61739	0.478207	17.8693	0.373292	0.975969	0.620186
manY	1.53469	0.843674	15.8243	0.778629	1.0919	0.62272
macB	1.5914	0.887824	17.4636	0.844785	1.00259	0.624477
aaeA	1.73756	0.770233	18.3856	0.631385	1.03454	0.624495
corC	1.58258	1.05939	18.1661	0.711179	0.941472	0.624919
rhtB	1.51675	0.52301	18.1176	0.371786	0.909823	0.628179
arsB	1.71524	0.520082	18.7949	0.430072	0.998465	0.631793
emrD	1.58748	1.11512	18.804	0.817222	0.95209	0.635855
proP	1.70728	0.704516	20.2683	0.5759	0.98366	0.654739
uacT	1.61185	0.975893	19.9049	0.783858	0.954219	0.656649
ulaA	1.53771	0.740039	18.7804	0.532708	0.912158	0.658928
phnK	1.59947	0.665817	18.6293	0.553114	0.947588	0.659122
yibH	1.62254	0.611395	18.2874	0.454982	0.966334	0.666123
yqeG	1.62091	0.615453	20.1019	0.506681	0.983761	0.700068
gntT	1.53547	1.01978	20.141	0.856319	0.924946	0.706575
gltP	1.6393	0.829753	19.5202	0.696217	0.997634	0.713431
exbD	1.69515	0.668617	20.9601	0.57553	0.971482	0.713671
yeeE	1.70123	0.525825	19.3602	0.421186	1.01517	0.717833
mscM	1.71504	0.428699	24.6717	0.352186	0.996816	0.843973

## Sheet: Ceftriaxone
Strain	MaxOD	Rate	AUC	Normalized MaxOD	Normalized Rate	Normalized AUC
arnE	0.213053	0	0	0	0.130675	0
hsrA	0.320814	0	0	0	0.190501	0
lplT	0.284519	0	0	0	0.176072	0
yccS	0.227294	0	0	0	0.140535	0
yifK	0.232642	0	0	0	0.135331	0
ynjD	0.297556	0	0	0	0.180676	0
yphF	0.320124	0	0	0	0.194318	0
yrbG	0.27119	0	0	0	0.161342	0
yaaJ	0.303289	0	0	0	0.187443	0
ydiK	0.227307	0.0394759	0.432773	0.0334935	0.138149	0.0149307
yfdV	0.215176	0	0.425854	0	0.130217	0.0150391
yjfF	0.16632	0.0330916	0.393235	0.0361458	0.101034	0.0150523
argO	0.269349	0.0280853	0.423164	0.0232286	0.163418	0.0151078
ghxQ	0.291014	0.0559958	0.41959	0.0470516	0.177273	0.0152227
ynfA	0.179217	0.0278932	0.373928	0.0394099	0.120685	0.0152232
guaB	0.238637	0.0619599	0.451127	0.0676541	0.145087	0.0159454
ydjK	0.250909	0.0650804	0.491427	0.0663668	0.150349	0.0170418
yajR	0.285266	0.0353199	0.458387	0.0310513	0.17937	0.0171302
yneE	0.183043	0.0179064	0.468922	0.0162335	0.117058	0.0174223
mdtL	0.216531	0.0454012	0.483766	0.0424696	0.129249	0.0174326
ycaD	0.248382	0.0451195	0.502356	0.044342	0.151304	0.0174345
phoR	0.277058	0.0403888	0.535193	0.0377156	0.162183	0.017954
dtpA	0.15915	0	0.518039	0	0.0972446	0.018027
cusA	0.257634	0.0569686	0.53071	0.0588452	0.152901	0.0180399
uhpC	0.233097	0.0337375	0.53655	0.0290524	0.137883	0.0181835
dtpB	0.208635	0.0387227	0.528519	0.0325414	0.125356	0.0181942
ygdQ	0.220098	0.0489541	0.507893	0.0463737	0.137276	0.0182084
ybjJ	0.204773	0.0141856	0.531098	0.0118584	0.123907	0.0182452
ybhF	0.361954	2.64191e-09	0.539017	2.68727e-09	0.208187	0.0182684
setB	0.267389	0.0218784	0.532366	0.0207761	0.160922	0.0182751
kdgT	0.24917	0.0599317	0.530374	0.0488651	0.153406	0.0182909
yggT	0.266148	0.0424237	0.502362	0.0357197	0.168257	0.0184079
yeaV	0.236969	0.072125	0.531429	0.0610839	0.142531	0.0184169
tdcC	0.257649	0.0304566	0.538075	0.0251855	0.152083	0.0185133
macB	0.236519	0.0166652	0.518331	0.0158574	0.149008	0.0185349
srlA	0.308766	0.0533872	0.510097	0.0454694	0.18675	0.0186451
ydhP	0.229832	0.0481363	0.523271	0.0494391	0.148156	0.0186776
argT	0.272678	0.0524778	0.514146	0.0500378	0.186032	0.0187059
ybhN	0.32897	0.0689002	0.556617	0.0613843	0.203225	0.018884
ghxP	0.207279	0.0390532	0.528825	0.0321397	0.123316	0.0188861
ybhS	0.238049	3.60577e-07	0.529703	3.61378e-07	0.155191	0.0192995
yeeO	0.295664	0.0838257	0.576125	0.0701271	0.175954	0.0193638
garP	0.26487	0.0777108	0.574066	0.072296	0.15348	0.019515
hisM	0.252041	0.0351034	0.555168	0.0309391	0.150334	0.0195375
ybhI	0.322265	0.0376886	0.578302	0.0350982	0.194138	0.0196846
yfcJ	0.25132	0.0183246	0.558587	0.0185832	0.156858	0.0198541
yfjD	0.240947	0.0518599	0.586252	0.0394676	0.145849	0.0199537
ynjC	0.302432	0.0320788	0.572819	0.0245555	0.183393	0.0200605
ybiO	0.227707	0.0631406	0.51722	0.0689084	0.15029	0.0200978
narK	0.245798	0.0266522	0.571308	0.0243868	0.146807	0.0201727
aqpZ	0.278402	0.0485481	0.569449	0.0435523	0.163324	0.0202492
yihP	0.271963	0.042609	0.604472	0.0364822	0.160623	0.0203652
pheP	0.27819	0.0358606	0.61773	0.0287686	0.163709	0.0204621
ybiR	0.262883	0.0385025	0.611704	0.0328407	0.157721	0.0204899
ansP	0.307529	0.0471181	0.621343	0.0445535	0.182819	0.0207416
ydcO	0.231719	0.0502226	0.562058	0.0433648	0.145017	0.0208912
yicL	0.27355	0.0304258	0.622489	0.0234957	0.15967	0.020947
yfdC	0.217088	0.0114276	0.623422	0.00886842	0.129398	0.0209499
rutG	0.271956	0.0374413	0.605605	0.0423579	0.166471	0.0210909
yiaN	0.18712	0.027579	0.587976	0.0216707	0.114625	0.0213465
yhdY	0.27644	0.0271547	0.611681	0.0223053	0.167178	0.0216237
yebQ	0.250739	0.0743788	0.544393	0.11222	0.159803	0.021915
manY	0.256337	0.0402212	0.557326	0.0371202	0.18238	0.021932
yijE	0.239628	0.0362871	0.632567	0.0299762	0.145636	0.0220441
barA	0.184399	0.0231276	0.634056	0.0233294	0.111016	0.0221241
kup	0.258536	0.0210645	0.620452	0.0159282	0.156455	0.0222048
rcnA	0.215869	0.00974734	0.643621	0.00796585	0.13156	0.0223049
fryC	0.309554	0.0346961	0.670143	0.0368789	0.183761	0.0223704
ydhJ	0.26544	0.0473164	0.647811	0.0435726	0.162807	0.0224477
yjeM	0.263096	0.0343485	0.649924	0.0278581	0.162657	0.0228702
rarD	0.225121	0.0214007	0.646146	0.0149584	0.13662	0.023215
sstT	0.330714	0.0511531	0.658336	0.0434593	0.199746	0.023343
galP	0.36766	0.0548842	0.713366	0.0445326	0.209191	0.0236148
trkH	0.260822	0.0318925	0.662273	0.0234647	0.161299	0.0239413
ybhR	0.311283	0.0396446	0.649995	0.0336575	0.184706	0.0239953
rhtA	0.219047	0.0163958	0.702368	0.0134617	0.13376	0.0240205
ycaM	0.297867	0.0244439	0.716231	0.0198927	0.176872	0.0242676
glvC	0.326425	0.0561497	0.702302	0.0478286	0.190027	0.0243561
yhbE	0.272331	0.0304693	0.677247	0.0250884	0.168129	0.0245224
yhfK	0.291491	0.0332604	0.673617	0.0284978	0.177413	0.0249933
yehW	0.29562	0.0197761	0.707402	0.0205575	0.182817	0.0250486
mdtJ	0.292406	0.0283646	0.736157	0.0270646	0.177004	0.025083
plaP	0.298667	0.0329411	0.727906	0.0253901	0.182522	0.0254185
eamA	0.261754	0.0251634	0.720823	0.019157	0.154393	0.0260619
arnF	0.22937	0.0294912	0.714785	0.0230645	0.140831	0.0261262
mhpT	0.284052	0.0231333	0.794059	0.0159054	0.164347	0.0262572
atpI	0.322081	0.0189681	0.770786	0.0144043	0.190871	0.0265096
dhaM	0.264727	0.0295977	0.791322	0.0234708	0.157944	0.0265098
ygaZ	0.326759	0.0403055	0.668521	0.039054	0.23736	0.0265527
potH	0.287446	0.0550939	0.762072	0.0479644	0.171715	0.0266153
kdpD	0.308619	0.0475823	0.754324	0.0450536	0.18366	0.0267678
alx	0.323019	0.0236634	0.774476	0.0182998	0.194319	0.0269681
dlsT	0.271366	0.0308887	0.778839	0.0215933	0.165214	0.0271691
rbbA	0.344719	0.032055	0.775555	0.0272428	0.205922	0.0275062
emrD	0.296085	0.0215171	0.830429	0.0157689	0.177577	0.0280809
frvB	0.326965	0.0234835	0.814486	0.0177004	0.193933	0.0286255
tsgA	0.276383	0.0266984	0.835149	0.0210514	0.162754	0.0287731
adeQ	0.269185	0.0180706	0.788407	0.0131478	0.164987	0.0288324
yejB	0.210217	0.560475	0.807007	0.563754	0.135052	0.0298577
yadH	0.270604	0.026241	0.892319	0.0210583	0.161263	0.0309037
rhtC	0.286113	0.0283321	0.890298	0.0202967	0.173385	0.0312462
yhhS	0.241973	0.0446388	0.906064	0.0341798	0.146924	0.032012
yahN	0.270127	0.0302844	0.996777	0.0220768	0.161295	0.0334654
mdtH	0.167702	4.44532e-06	0.928372	4.9616e-06	0.101153	0.0334831
bcr	0.310327	0.0164507	0.960172	0.0122388	0.185897	0.034182
fetB	0.221313	0.020189	0.943723	0.0161874	0.136165	0.0345726
ssuC	0.34482	0.0474525	0.902676	0.040519	0.236677	0.0345835
gdx	0.237829	0.0222589	0.942884	0.0182929	0.146476	0.034615
yhhJ	0.276573	0.0343545	1.0144	0.0250949	0.168057	0.0346521
ynjB	0.291488	0.0243237	0.972579	0.018512	0.177612	0.0352605
metI	0.26231	0.0202637	0.966921	0.0171958	0.155288	0.0353571
setC	0.244099	0.00901582	1.02168	0.00843341	0.145717	0.0354548
yjjP	0.310523	1.00479e-07	1.02004	7.24377e-08	0.182364	0.0356041
rhtB	0.294361	0.0191495	1.03989	0.0136126	0.176573	0.0360554
yadS	0.290645	0.0193138	1.04107	0.0177746	0.176809	0.0366885
thiP	0.318113	0.0204722	1.06311	0.017268	0.195078	0.0367705
ulaA	0.327872	0.0182263	1.05642	0.01312	0.194491	0.0370656
mdtB	0.29528	0.0327011	1.15316	0.0258152	0.17533	0.0384924
clcA	0.223751	0.0119502	1.05666	0.00924039	0.137568	0.0387531
yfcC	0.345881	0.0279139	1.13039	0.0249077	0.210324	0.0390452
dcuA	0.257417	0.0164772	1.14023	0.0135559	0.158265	0.0394724
dtpD	0.271272	0.0324388	1.18177	0.0257756	0.163323	0.0397945
leuE	0.261871	0.0261186	1.19946	0.0231745	0.159855	0.04114
lacY	0.277306	0.0386699	1.2727	0.031766	0.157297	0.0411805
ybaL	0.272224	0.0630643	1.03605	0.0645737	0.188195	0.0412373
sufB	0.234315	0.0273389	1.17399	0.0197117	0.145527	0.0415898
ydhC	0.320492	0.0240367	1.22504	0.0232755	0.195438	0.0417341
yjeH	0.195623	0.0463603	1.21697	0.038578	0.116482	0.0427487
uacT	0.336097	0.0249193	1.29624	0.0200157	0.19897	0.042762
yhhT	0.267943	0.0456585	1.26848	0.0314556	0.161541	0.0430844
phnL	0.256435	0.026286	1.23116	0.0230217	0.151044	0.0438957
yhdX	0.286355	0.0276702	1.26861	0.0201604	0.175987	0.0444312
ybbY	0.209647	0.0162636	1.27734	0.014515	0.128294	0.0448515
mdtI	0.368217	0.102045	1.24508	0.106196	0.213197	0.0453866
yhjE	0.299992	0.0148676	1.35132	0.0130503	0.186192	0.0485641
yadI	0.349257	0.040268	1.31907	0.038316	0.228303	0.0487247
yegH	0.25303	0.0264734	1.38331	0.0186125	0.156848	0.0493664
yjbB	0.287673	0.0115046	1.37251	0.0102685	0.168795	0.0500794
ytfT	0.288816	0.0361401	1.46495	0.026342	0.177206	0.0517384
livH	0.437469	0.0516735	1.47395	0.0432746	0.266074	0.0521344
zntA	0.283447	0.0334534	1.53622	0.0291744	0.165109	0.0532805
zupT	0.262322	0.0440655	1.61504	0.0341184	0.156876	0.054641
nlpA	0.32446	0.029636	1.60285	0.0260345	0.190992	0.05721
mlaE	0.258283	0.0308891	1.64977	0.0237764	0.155118	0.0608146
ydcZ	0.39271	0	1.88465	0	0.235999	0.064541
yedA	0.276677	0.0380025	1.8969	0.034036	0.167786	0.0673779
rcnB	0.29677	0.0162099	1.89463	0.011928	0.183559	0.0675877
ygbN	0.411734	0.0558326	1.92345	0.0504623	0.254965	0.0680512
panF	0.753994	0.481204	2.02725	0.374314	0.441615	0.0681703
artJ	0.345946	0.0598718	1.8377	0.0532156	0.234375	0.0685451
murP	0.372789	0.0137143	1.96842	0.0120333	0.227075	0.0689435
narU	0.387594	0	2.10793	0	0.226315	0.0703134
gltS	0.405125	0.122533	2.08391	0.0919953	0.24568	0.0734777
mlaC	0.28536	0	2.16077	0	0.17046	0.0737886
nimT	0.348398	0.0219602	2.11785	0.0168374	0.205186	0.0742814
uhpT	0.492721	0.0873129	2.20518	0.0658376	0.295979	0.0778496
ygaH	0.456906	0.0348811	2.50912	0.0296559	0.266321	0.0805579
mdtK	0.372101	0	2.33108	0	0.227186	0.0812559
ydhK	0.277533	0	2.3847	0	0.166249	0.082605
ybjL	0.359568	0	2.53344	0	0.217221	0.087058
clcB	0.3611	0	2.44758	0	0.218314	0.0873004
zitB	0.380456	0	2.53743	0	0.231896	0.0886713
mdtD	0.338414	0	2.61799	0	0.208438	0.0913326
psuT	0.295471	0	2.62457	0	0.179799	0.0916243
yqcE	0.339549	0	2.72427	0	0.207528	0.0940279
ynfM	0.358217	0	2.74926	0	0.219842	0.0942994
ttdT	0.323091	0	2.73278	0	0.199138	0.096053
ygjI	0.36867	0	2.8142	0	0.221666	0.0994105
ydiM	0.323535	0	2.90066	0	0.198133	0.0998053
yejE	0.446355	0	2.97021	0	0.269949	0.099855
nupX	0.399658	0	3.0153	0	0.242962	0.104026
acrD	0.538732	0.245249	3.29323	0.218912	0.328694	0.112776
mltF	0.405373	0	3.29145	0	0.245476	0.113864
livK	0.411917	0.18425	3.19514	0.14103	0.253139	0.114709
ydeE	0.39877	0.0255267	3.32499	0.0213456	0.243724	0.117326
yehY	0.427263	0	3.62063	0	0.259655	0.124087
tqsA	0.469629	0	3.73756	0	0.284627	0.126723
fucP	0.826543	0.516843	3.91182	0.462376	0.483597	0.127958
alsC	0.365229	0.63727	3.72151	0.497457	0.220387	0.129162
nupG	0.553598	0.110436	3.69796	0.0904989	0.338034	0.133771
yheS	0.834067	0.445896	3.82191	0.339335	0.515571	0.136638
frlA	0.416631	0.0344161	4.22634	0.0272357	0.25476	0.148142
dcuD	0.481781	0.154451	4.11191	0.137087	0.300275	0.151853
potB	1.12358	0.455408	4.20184	0.393807	0.683811	0.152485
rhmT	0.932954	0.321178	4.65235	0.263911	0.56511	0.165089
agaV	1.19047	0.428955	4.9384	0.358309	0.720148	0.170397
xylH	1.07303	0.43234	4.84325	0.359442	0.663878	0.179554
aaeA	0.973505	0.590512	5.29371	0.484061	0.579622	0.179808
eamB	0.600001	3.88105	5.46679	3.16097	0.3569	0.18222
nikC	1.48605	0.614774	5.52228	0.491968	0.9048	0.189933
mtr	1.05694	0.505943	5.84175	0.452271	0.621088	0.193756
yicG	0.476545	0.158683	5.95719	0.125298	0.28009	0.199795
modF	1.10084	0.410168	5.65387	0.345858	0.678495	0.206241
ptsI	0.587002	0.0945493	6.08709	0.0706691	0.333167	0.210899
mscM	1.04678	0.259771	6.19072	0.213408	0.608413	0.211773
tatC	1.14887	0.507757	6.41564	0.433903	0.680003	0.221902
fsr	1.09542	0.781881	7.11726	0.654081	0.635629	0.241022
mngA	1.10051	0.788344	7.44974	0.723465	0.640645	0.251135
gntT	0.967507	0.329491	7.37945	0.276677	0.582812	0.258881
exuT	1.14257	0.624023	7.80343	0.504446	0.682394	0.267803
ydiN	0.985098	0.436015	7.98934	0.356414	0.620421	0.282963
arsB	1.11922	0.495623	8.81594	0.409847	0.651514	0.29635
tehA	0.70769	0.193216	8.28706	0.201844	0.420534	0.297031
ybhG	0.921261	0.439576	8.76166	0.430523	0.5497	0.303253
araH	1.26221	0.27588	8.62182	0.25319	0.772527	0.310103
yddA	1.04095	0.402537	9.10434	0.31349	0.610928	0.313439
acrF	1.46722	0.60948	9.57126	0.602121	0.867592	0.327356
yoaE	0.960294	1.09734	9.45584	0.950895	0.589671	0.333176
mscS	1.05444	0.912822	9.59253	0.745187	0.639967	0.334555
yddG	1.05059	0.498446	9.90972	0.502138	0.634676	0.339485
fieF	1.42627	0.389704	9.9698	0.299437	0.832868	0.342693
exbD	1.0379	0.462707	10.488	0.398287	0.594814	0.357107
yidK	1.23451	1.27867	10.8123	0.930135	0.722892	0.361538
nirC	1.15853	0.470634	10.5194	0.400183	0.693599	0.366738
treB	1.10295	0.482397	10.8918	0.398769	0.668298	0.375561
rhaT	1.1768	0.49683	11.6433	0.398736	0.680871	0.384561
exbB	1.05698	0.623751	12.0636	0.522711	0.602984	0.388644
cmtA	1.26976	0.746119	11.1399	0.64751	0.78008	0.39398
xanP	1.06043	0.44276	11.7275	0.334455	0.648743	0.407353
gabP	1.05546	0.569115	12.0149	0.480906	0.626541	0.408185
cadB	1.20352	0.490989	11.5117	0.425791	0.742101	0.412088
lsrC	0.962849	0.817882	11.6518	0.740866	0.593757	0.412327
yqeG	1.1291	0.527976	11.9896	0.434664	0.685271	0.417549
atoS	1.07713	0.996751	12.616	0.975494	0.616338	0.424423
mdtF	0.941735	0.482484	11.6049	0.418558	0.579614	0.42472
mdtN	1.57253	0.41156	12.3237	0.327622	0.928515	0.429341
phnD	1.24685	0.612519	12.3619	0.480625	0.760747	0.430864
feoB	1.16952	0.496545	11.9388	0.367693	0.717571	0.434463
dsdX	0.966765	1.01809	12.5476	0.961783	0.565855	0.450894
dppB	1.03062	0.899197	13.2513	0.737175	0.62943	0.455424
ugpA	1.33375	0.350667	13.5229	0.290011	0.803076	0.456099
melB	1.09913	0.419179	13.5351	0.359324	0.645265	0.45757
puuP	1.06862	0.460218	13.1752	0.381186	0.647426	0.465646
cysP	1.20587	0.563599	13.475	0.482265	0.727295	0.468101
ptsP	1.22576	0.422498	13.5447	0.342802	0.73792	0.469622
ampG	1.34199	0.759982	13.3934	0.690805	0.800333	0.469838
mtlA	1.41326	0.630372	14.532	0.494133	0.826744	0.473912
proP	1.17604	0.567087	14.7754	0.46356	0.677584	0.477299
malF	1.15283	0.379888	12.982	0.282897	0.667542	0.47993
dctA	1.30145	0.58602	13.7127	0.511555	0.790087	0.481606
proW	1.10804	0.685882	12.4449	0.849675	0.685111	0.486777
emrY	1.16769	0.380995	14.0595	0.316762	0.690102	0.49002
hcaT	1.07609	1.15323	14.5275	0.923193	0.624006	0.490413
emrB	1.33164	0.516605	13.9315	0.464796	0.782581	0.491179
cycA	1.16851	0.461855	14.6894	0.357148	0.684802	0.493333
kefB	1.47249	0.559996	13.5632	0.442895	0.91662	0.499946
dcuB	1.3748	0.472439	14.5424	0.38308	0.818898	0.506591
ascF	1.31228	0.511566	13.7865	0.423425	0.807192	0.51204
uraA	1.46763	0.590639	14.7298	0.592905	0.908647	0.512588
gltP	1.17954	0.827476	14.1622	0.694306	0.717832	0.517607
pitA	1.50623	0.613798	14.1301	0.477679	0.92886	0.522904
livJ	1.41147	0.536519	15.0185	0.510979	0.824592	0.525524
ybbW	1.34704	0.512782	14.5886	0.447358	0.832371	0.530112
ptsN	1.20114	0.637572	14.0817	0.647335	0.76309	0.532202
atoE	1.38151	0.457382	14.3556	0.378472	0.849971	0.533372
tolR	1.38398	0.712627	15.0348	0.61728	0.876732	0.53443
cysW	1.25473	0.603648	14.5589	0.52368	0.799881	0.536278
gntP	1.43793	0.361493	15.5749	0.283977	0.874364	0.539881
ydfJ	1.27654	0.901111	16.4474	0.66415	0.748059	0.540527
glvB	1.70908	1.12682	15.5123	1.0751	1.00089	0.542031
mdlB	1.22105	1.21258	16.2948	0.878474	0.714155	0.542033
nanT	1.52929	0.556057	16.747	0.456089	0.871515	0.544312
tolQ	1.37229	0.807318	15.0526	0.892707	0.864485	0.544405
xanQ	1.29457	0.556542	14.8276	0.536522	0.791213	0.546608
citT	1.81043	1.00319	15.018	0.97504	1.10869	0.549033
mscL	1.92027	0.93663	14.3492	0.838375	1.18558	0.549304
agaC	1.34741	0.437975	15.7937	0.347635	0.834922	0.554409
ytfF	1.30016	0.783828	15.7786	0.655313	0.79777	0.563677
yphD	1.73367	0.628036	15.7305	0.548704	1.09187	0.56877
yojI	1.33997	0.483926	17.0564	0.390362	0.809579	0.571976
cmtB	1.44398	0.596937	15.6559	0.504017	0.88107	0.574147
yraQ	1.12131	0.864133	16.2378	0.799989	0.668703	0.579408
focB	1.42726	0.539424	16.656	0.459012	0.867153	0.580311
shiA	1.24039	1.07312	17.7311	0.757125	0.736251	0.585374
lptB	1.56264	0.596599	15.6538	0.499428	0.969392	0.585966
sdaC	1.5592	0.702319	16.8939	0.704028	0.922971	0.589562
gudP	1.51625	0.484007	16.2767	0.365572	0.93163	0.589784
yphE	1.48065	0.898835	16.7951	0.82271	0.87059	0.590216
yhdW	1.38812	0.716223	17.2377	0.509748	0.837592	0.597292
mdtO	1.35959	0.436291	18.7097	0.346713	0.761297	0.605405
yiaM	1.05185	0.893889	18.1028	0.73938	0.629049	0.606479
yihN	1.8398	0.94371	17.8203	0.803762	1.07117	0.614572
yjcE	2.18244	0.48019	18.1132	0.42824	1.23632	0.614949
yidE	1.74096	0.85156	18.9259	0.699286	1.00566	0.621927
perM	1.40294	0.325298	16.5647	0.270282	0.880927	0.622823
yhjV	1.24319	0.559878	17.5345	0.432223	0.747929	0.632129
hofC	1.82478	1.48949	18.6504	1.16399	1.07772	0.633586
mgtA	1.56666	0.515447	17.369	0.361486	1.03905	0.640378
mglC	1.44711	0.818278	18.1818	0.765599	0.888306	0.645415
crr	1.73865	0.754679	18.4805	0.5941	1.04194	0.649871
yeeA	1.81422	0.547319	18.9774	0.448066	1.05316	0.652838
ytfL	2.05386	1.09991	18.5906	0.88958	1.20803	0.657478
ygaY	1.37587	0.614566	18.9022	0.459109	0.813305	0.659178
fruA	1.39145	0.599261	18.535	0.489514	0.844183	0.66159
glpF	2.14448	1.053	19.2061	0.876723	1.30597	0.671641
yfbS	1.02465	0.808036	19.0372	0.692854	0.625828	0.674424
adiC	2.03629	1.12252	19.8334	0.951572	1.17033	0.680311
ptsG	1.99356	1.08049	20.1969	0.958807	1.19928	0.708275
nepI	1.79109	0.86498	21.8782	0.713137	1.05176	0.739426
dtpC	1.7549	0.796364	22.3285	0.565291	1.02433	0.741492
ybbP	1.82861	0.95543	22.4281	0.826429	1.06733	0.751162
yihO	1.91947	1.56114	21.0994	1.27988	1.1198	0.752465
yfeO	1.45622	1.00313	20.309	0.772588	0.879833	0.761922
dauA	1.98209	1.30537	23.0333	1.10129	1.17692	0.76955
atpB	1.78388	2.09162	22.3463	1.67681	1.08777	0.774126
cydD	2.04007	0.937897	21.6181	0.721285	1.23348	0.775113
betT	1.82283	0.834568	22.9312	0.752956	1.06368	0.782879
cvrA	2.00421	0.764264	24.4714	0.607302	1.14746	0.793579
tnaB	1.89754	0.96835	24.5959	0.721928	1.09675	0.799824
yicJ	2.12169	0.937751	24.0859	0.718601	1.27769	0.801333
btuC	2.07189	0.795084	22.8475	0.795326	1.24992	0.802004
adeP	1.93547	1.16499	23.2485	0.959831	1.12352	0.802723
ygiS	2.00905	0.569734	23.3087	0.432526	1.23149	0.806689
kgtP	1.99212	1.13455	23.3273	0.916197	1.15663	0.809376
corC	1.83235	0.533253	23.7937	0.357977	1.09006	0.818512
potE	1.89223	1.46644	22.9704	1.24469	1.17706	0.825116
lldP	2.03521	1.0913	23.8364	0.887297	1.19938	0.826503
torT	2.05783	0.814968	22.2847	0.6847	1.28883	0.828646
ybbA	2.07058	1.10885	22.722	1.01524	1.26452	0.832142
ygcS	1.84678	1.87761	24.7669	1.57388	1.0755	0.833684
kch	2.11203	1.18976	24.3313	1.08146	1.26674	0.855612
ddpF	1.80743	1.5847	26.6151	1.27258	1.04911	0.86801
ybiT	2.09539	0.867504	25.3639	0.733649	1.22971	0.868555
ybaE	1.90443	1.02102	24.7592	0.807314	1.15024	0.872802
ycjO	1.91737	0.629821	24.7377	0.57933	1.18954	0.873099
araE	1.98463	1.18575	25.6189	1.01274	1.18865	0.876187
bglF	1.99147	0.810672	26.8342	0.630437	1.12161	0.876679
actP	2.06792	0.770737	24.7307	0.586443	1.20168	0.878645
cynX	2.19786	0.907056	24.4964	0.839053	1.33179	0.893374
putP	2.41997	0.85765	26.2548	0.834154	1.43767	0.893889
eutH	1.82587	0.942917	24.4594	0.843992	1.14254	0.895231
yggR	1.8489	1.14349	24.9378	0.91335	1.14352	0.899387
ydjN	2.04876	1.18843	26.3997	1.02423	1.19486	0.901638
ydjX	1.79948	1.07297	25.5064	0.875438	1.08476	0.901778
fetA	2.21966	0.890532	25.0938	0.817723	1.35124	0.902104
yaaU	2.20385	0.802532	24.866	0.681307	1.36952	0.905152
dinF	2.24855	0.727244	25.8641	0.567997	1.34239	0.909995
lsrA	1.98445	0.899115	26.1854	0.762234	1.16365	0.910296
corA	2.07793	1.20933	25.2236	1.14243	1.2179	0.916209
acrB	2.31199	0.803725	25.1958	0.66365	1.37839	0.919319
modB	2.06828	0.672124	25.8726	0.524616	1.28081	0.919843
ccmC	2.01569	1.31249	24.3244	1.26589	1.28705	0.92025
mdlA	1.94384	1.19735	26.0222	1.01907	1.18869	0.926547
ydcV	2.21806	1.07168	26.3825	0.833037	1.34623	0.927217
yjhF	1.98508	0.985216	26.0054	0.884872	1.2117	0.927284
tyrP	1.98822	0.85145	26.6492	0.709726	1.20928	0.9281
rbsC	2.00168	0.813502	28.539	0.664682	1.17151	0.933112
artI	2.24058	1.30091	26.9259	1.01278	1.3089	0.933982
dgoT	2.27232	0.988971	28.0549	0.800523	1.3452	0.934333
nhaB	2.19732	1.40027	26.1637	1.26341	1.35825	0.93906
malX	2.15107	0.785992	26.0326	0.619014	1.35144	0.94013
idnT	2.09073	0.923558	28.2001	0.812967	1.21528	0.946948
xylE	2.095	0.64795	27.4498	0.541243	1.23834	0.948106
glnP	2.2224	1.76941	27.8348	1.6687	1.34254	0.950068
ypjA	1.94243	0.833952	26.396	0.71949	1.17545	0.952223
sbp	2.06845	0.788508	24.7465	0.629012	1.30884	0.952763
wt	1.02135	2.7552	29.5075	1.92366	0.57574	0.955457
gltK	2.32609	0.945884	25.8343	0.78949	1.44404	0.955731
ybaT	2.2663	0.923033	26.6637	0.824043	1.39569	0.961149
ddpB	2.23533	1.18477	26.9098	1.21482	1.35418	0.961303
codB	2.22516	0.541293	27.2867	0.440926	1.31913	0.96234
yibH	2.29552	1.34099	26.6149	0.997924	1.36713	0.969454
yhjX	1.9459	1.07451	28.2999	0.810223	1.14656	0.971531
znuB	1.90105	1.02618	28.3023	0.918278	1.13163	0.972792
chaA	1.92919	1.39333	25.3934	1.38326	1.2285	0.976623
dcuC	2.05851	1.02459	28.4805	0.878966	1.24724	0.97942
setA	2.47739	0.686699	28.5025	0.578156	1.45101	0.982359
kdpA	2.41936	0.755035	27.4672	0.619384	1.46319	0.98248
ycfT	2.2187	1.09879	27.2399	0.952344	1.33005	0.984007
yqgA	1.91292	0.921533	26.098	0.761774	1.15099	0.993452
sapC	1.71744	1.53953	25.8888	1.60171	1.03252	0.997229
ettA	2.43367	0.742157	29.4121	0.536271	1.42702	1.00319
amtB	2.40554	0.932992	27.9994	0.83124	1.48146	1.00429
yegT	1.95806	1.00112	28.9115	0.918478	1.15106	1.00621
focA	2.38025	0.946126	28.3772	0.798768	1.44381	1.00934
gntU	2.17362	1.16849	30.5779	0.932664	1.30405	1.01176
soxR	1.80012	1.33675	28.2468	1.06943	1.09739	1.01205
gadC	2.22626	0.86756	29.9258	0.792848	1.32185	1.0121
glpT	2.18659	1.5286	28.9171	1.34951	1.26015	1.01495
fryA	1.87521	1.02772	27.6736	0.789476	1.17952	1.01638
yjhB	1.90964	1.55624	28.2173	1.24773	1.18396	1.01828
fepD	2.06085	1.08106	28.3001	0.945383	1.29334	1.01906
sgcA	1.84201	0.868191	27.9418	0.641424	1.15373	1.02185
entS	2.0424	1.01794	30.6081	0.781459	1.21114	1.02327
kefC	2.08338	0.584827	28.4905	0.490426	1.25568	1.03796
sotB	2.1242	1.20799	28.9944	0.960023	1.30602	1.04577
copA	2.22257	1.2682	28.6657	1.10043	1.34438	1.04778
artQ	2.28261	0.755644	30.585	0.690796	1.38193	1.04813
mdtG	2.20322	1.1001	30.4421	1.05322	1.33061	1.05278
sapB	1.93212	0.935376	27.0907	0.943109	1.24559	1.0566
ydgI	2.13855	1.11524	31.0591	0.832227	1.27866	1.05702
aroP	2.17114	0.735799	29.5373	0.630585	1.31484	1.05755
sapF	1.86957	0.958715	30.0242	0.80175	1.1592	1.05764
sapA	2.22306	1.11476	29.7834	0.925833	1.39879	1.06548
yfeH	2.09469	1.40815	31.8343	1.05094	1.2674	1.06635
xapB	2.10555	1.48062	28.6361	1.28491	1.31424	1.06636
mscK	2.2643	1.03699	29.0528	0.90218	1.36051	1.06701
frwC	2.05088	1.30611	30.2578	1.01438	1.26346	1.06717
fryB	1.83187	0.885593	30.7906	0.678366	1.10499	1.07029
araJ	2.20147	0.620665	29.9717	0.506911	1.34629	1.07178
zntB	2.04774	1.00939	30.9483	0.756183	1.26326	1.07769
brnQ	1.94047	1.01096	29.4896	0.843936	1.18511	1.07809
mepM	1.283	0.831884	32.2357	0.663744	0.750579	1.08133
caiT	2.48579	0.828811	31.0529	0.650554	1.50178	1.08252
uidB	2.32474	0.775532	31.0012	0.613799	1.40504	1.08336
phnK	2.47948	0.815882	30.8987	0.677777	1.46894	1.09323
yiaV	2.03854	1.32123	32.7238	1.07886	1.21067	1.10933
ydcU	1.12569	0.814443	32.9839	0.641616	0.666961	1.11649
yhdP	2.22431	1.09766	33.5787	0.911372	1.29522	1.1199
yhdZ	2.12547	1.07126	33.7147	0.934656	1.24009	1.12022
ykgG	1.79406	1.07823	30.5823	0.847359	1.10416	1.12067
yhiD	1.90469	1.15535	31.8358	0.839809	1.14761	1.12143
wzxE	2.39274	0.532052	31.7557	0.449427	1.44293	1.12208
mdfA	2.01227	1.43148	29.9622	1.15572	1.27939	1.13206
ydcT	1.83905	0.991424	31.2239	0.752638	1.15511	1.13791
frwB	2.20993	1.41048	31.9605	1.01068	1.36591	1.14226
yjiJ	2.15847	0.661271	33.2193	0.52251	1.25836	1.1424
oppB	2.01654	0.99844	30.7546	0.967199	1.24194	1.14485
sgcC	2.15611	1.16003	32.6447	0.839367	1.3075	1.14667
chbC	2.15839	0.831276	31.427	0.694198	1.3585	1.14796
ycjN	2.0336	0.835314	32.0681	0.678686	1.22787	1.15864
frvA	2.02965	0.958837	34.7055	0.690845	1.19026	1.16613
ycjP	2.41174	0.844416	34.3923	0.681369	1.43572	1.16721
lysP	2.30458	1.06366	34.2068	0.923531	1.36975	1.17233
nagE	2.14974	1.13774	31.1401	1.00485	1.37458	1.17282
ddpD	2.18043	1.47953	32.6419	1.12447	1.32853	1.18253
proY	2.21635	0.98381	34.4628	0.772368	1.32214	1.18253
yghD	2.27	1.23044	33.3112	0.972184	1.36882	1.18364
frwD	2.0374	0.983518	34.1307	0.711985	1.2695	1.20865
yadG	1.95943	0.803765	31.6995	0.631465	1.19502	1.20998
sgcB	2.23192	1.57403	35.0323	1.22023	1.3575	1.21502
uup	2.28587	1.25031	32.9898	1.18789	1.42096	1.22256
yghE	1.96487	1.2831	33.3822	1.00999	1.18416	1.22462
ydjE	2.16794	0.971661	30.5063	0.980237	1.39158	1.22721
yddB	1.96324	0.785355	33.703	0.554517	1.23367	1.23697
yghF	2.03256	0.942691	35.1178	0.714378	1.23017	1.24509
ddpC	2.12939	1.01013	34.4934	0.71338	1.33007	1.26374
ydcS	2.01487	1.07975	31.2305	1.39816	1.20269	1.27729
yeeE	2.26208	0.807641	34.8584	0.646921	1.34985	1.29247
pstC	2.42682	1.23007	37.7207	1.15226	1.44042	1.3041
sapD	1.86038	1.49253	32.5492	1.64704	1.16094	1.31887
yhgE	2.21082	0.960749	36.6113	0.688677	1.32982	1.32946
yohK	2.20629	1.15017	34.9638	0.964119	1.32744	1.34338
yccA	2.15221	0.99937	35.8083	0.860419	1.37727	1.35583
ycjV	2.12007	1.19549	35.8363	1.02655	1.33215	1.37494
gsiC	1.4557	1.12901	39.9347	1.06333	0.905541	1.44856

## Sheet: Cifoderocol
Strain	MaxOD	Rate	AUC	Normalized MaxOD	Normalized Rate	Normalized AUC
mdtL	1.33931	0.757941	8.64641	0.708999	0.799443	0.311575
alsC	0.73307	0.79462	9.55089	0.620286	0.44235	0.331481
yejB	0.730663	0.598079	9.25158	0.601577	0.469407	0.34229
tsgA	1.16288	0.228152	10.39	0.179896	0.684787	0.357964
proP	1.18259	0.388993	12.7927	0.317979	0.68136	0.413251
potH	0.820795	0.212416	12.1226	0.184928	0.490328	0.423382
feoB	1.04871	0.740167	12.4487	0.548096	0.643448	0.453018
yifK	1.0333	2.3042	13.6282	1.93332	0.601084	0.46245
rhtA	1.03983	0.68857	14.4082	0.565349	0.634968	0.492752
ybjJ	1.2175	4.90401	14.4347	4.09948	0.736703	0.495886
leuE	1.08044	2.29017	14.9644	2.03202	0.659539	0.51326
yphE	1.24178	1.16115	14.7249	1.06281	0.730138	0.517464
yicG	1.47003	0.362453	15.4423	0.286198	0.864009	0.517913
yiaM	1.33337	2.08161	15.6396	1.72181	0.797408	0.523957
yjeH	1.41741	0.31647	14.9293	0.263346	0.843989	0.524422
cusA	1.15839	1.83817	15.4603	1.89872	0.687483	0.525526
mtlA	1.30114	0.665025	16.1506	0.521296	0.76115	0.526698
uhpT	1.14406	1.28363	15.0717	0.96791	0.687239	0.532079
ampG	1.52076	0.653681	15.2537	0.594181	0.906946	0.5351
acrD	1.38382	0.382601	15.7024	0.341514	0.844303	0.537725
ygdQ	1.03319	2.25284	15.1957	2.13409	0.644405	0.54478
fsr	1.6415	0.469581	16.1576	0.392827	0.952501	0.547169
ptsI	1.02931	1.19701	15.9509	0.894682	0.584206	0.552649
ghxP	1.1223	1.01085	15.534	0.831898	0.667687	0.554771
yggT	1.60718	0.165482	15.1428	0.139332	1.01604	0.554872
xylH	1.21941	1.22922	15.0134	1.02196	0.754444	0.556595
exbB	1.21872	1.09162	17.3697	0.914791	0.695255	0.559588
puuP	1.45761	0.322559	15.8343	0.267166	0.883093	0.559623
yqeG	1.32722	1.35334	16.1468	1.11415	0.805515	0.562326
ybhN	1.26702	3.27781	16.5894	2.92025	0.782718	0.562818
mdtO	1.46753	0.518316	17.4541	0.411897	0.821736	0.564778
arnE	1.29349	0.357381	15.5123	0.396765	0.793356	0.567837
yehW	1.23745	2.47618	16.2031	2.57402	0.765265	0.573742
yfcJ	1.70743	0.186592	16.2137	0.189225	1.06567	0.576291
emrB	1.4804	1.12147	16.7201	1.009	0.870002	0.589495
cysW	1.10068	2.59119	16.0956	2.24792	0.70167	0.592886
uraA	1.2889	2.55557	17.3471	2.56537	0.797992	0.603669
mdtH	1.04557	0.723535	16.7643	0.807567	0.63066	0.604628
cycA	1.41376	0.618193	18.076	0.478042	0.828531	0.607068
phoR	1.19734	2.05936	18.1316	1.92306	0.700894	0.608255
mngA	1.50711	0.256286	18.1673	0.235194	0.877344	0.612431
rhaT	1.4616	1.00578	18.5931	0.807202	0.845649	0.614104
barA	1.70322	1.00306	17.8019	1.01181	1.02541	0.621162
psuT	1.3708	0.38698	17.8215	0.355503	0.834159	0.622153
ydhJ	1.13747	1.96519	18.0009	1.8097	0.697662	0.62376
ybbY	1.35291	0.69295	17.8381	0.618445	0.82792	0.626352
nirC	1.51319	0.515645	18.1877	0.438456	0.905923	0.634081
gabP	1.32514	1.46085	18.6886	1.23443	0.786632	0.63491
cmtA	1.50277	0.242614	18.0042	0.21055	0.92323	0.636746
mdtJ	1.30904	1.35744	18.6965	1.29523	0.792408	0.637045
atoS	1.54342	0.375504	19.0221	0.367496	0.883149	0.639938
ydeE	1.2108	2.72136	18.1967	2.27562	0.740028	0.642093
xanQ	1.62871	0.544829	17.4327	0.525231	0.995433	0.642639
phnD	1.5152	0.352198	18.4438	0.276359	0.924477	0.642846
yeeO	1.48947	1.0922	19.1467	0.913718	0.886402	0.643529
ygaH	1.89874	0.384468	20.0507	0.326875	1.10674	0.643749
ybbW	1.79785	0.604465	17.844	0.527343	1.11094	0.648406
fucP	1.31005	0.887747	19.9517	0.794192	0.766488	0.652635
ybhR	1.16103	1.47256	17.7665	1.25017	0.68892	0.655871
exuT	1.5257	1.51212	19.1943	1.22236	0.91122	0.658723
yiaV	1.64216	0.812891	19.4666	0.663773	0.975268	0.659917
ydcZ	1.86342	0.697879	19.2704	0.606334	1.11982	0.659927
zupT	1.53278	0.315111	19.5971	0.24398	0.916651	0.663021
pheP	1.47744	0.869347	20.0606	0.69742	0.869444	0.664499
dsdX	1.43249	0.727378	18.5137	0.687152	0.838448	0.665284
rcnA	1.3801	0.611491	19.216	0.49973	0.841096	0.665938
melB	1.38026	1.54161	19.7109	1.32148	0.810308	0.666352
yihP	1.41851	0.867808	19.8472	0.743025	0.837778	0.668667
tehA	1.51947	1.14042	18.6721	1.19135	0.902921	0.669258
xanP	0.914477	0.246825	19.2856	0.186449	0.559454	0.669881
ptsN	1.42407	0.342897	17.7477	0.348148	0.90472	0.670754
sdaC	1.46135	0.666904	19.4	0.668526	0.865047	0.677021
ydiN	1.48562	0.538161	19.212	0.439911	0.935655	0.680443
yejE	1.801	0.347081	20.3055	0.311852	1.08921	0.682646
treB	1.36258	0.437119	19.8548	0.36134	0.825613	0.684616
dtpB	1.65609	0.768256	19.9163	0.645621	0.995045	0.685616
proW	1.42278	1.08242	17.5641	1.34091	0.879717	0.687012
livJ	1.73184	0.269443	19.6648	0.256616	1.01176	0.688105
malF	1.50731	0.803964	18.6404	0.5987	0.8728	0.689114
yedA	1.548	0.489895	19.4827	0.438762	0.938755	0.692027
yfdV	1.6676	0.598527	19.6086	0.636735	1.00918	0.692483
ygbN	1.68066	0.201585	19.6544	0.182195	1.04074	0.695367
ydhC	1.56287	0.577553	20.511	0.559262	0.953046	0.698758
ydcU	1.38298	1.9304	20.7211	1.52076	0.819405	0.701396
ydhK	1.49123	0.460501	20.2639	0.409385	0.893284	0.701935
agaC	1.53365	0.541081	20.0205	0.429473	0.950324	0.702783
yadS	1.74693	0.247636	19.9779	0.227901	1.06272	0.704042
yiaN	1.5571	1.14954	19.4731	0.903275	0.95384	0.70697
lacY	1.67445	1.56207	21.9042	1.28318	0.949804	0.708751
exbD	1.45942	0.667682	20.8431	0.574724	0.836383	0.709687
garP	1.48876	1.70914	20.9026	1.59005	0.862669	0.710571
yoaE	1.36245	0.722909	20.2531	0.626434	0.836612	0.713616
mepM	1.66861	0.90257	21.3741	0.720143	0.976169	0.716981
mtr	1.53937	0.892757	21.6626	0.798051	0.904581	0.718494
yojI	1.8066	0.251802	21.4564	0.203117	1.09151	0.719528
yfjD	1.41289	0.924248	21.1544	0.703392	0.855248	0.720015
murP	1.5069	0.565053	20.5643	0.495794	0.917893	0.720262
yeaV	1.39494	0.967631	20.8107	0.819503	0.839023	0.721203
gltP	1.59559	1.24712	19.7553	1.04642	0.97103	0.722023
frlA	1.55035	0.967247	20.6454	0.765448	0.948003	0.723662
panF	1.84815	1.23608	21.6077	0.961513	1.08246	0.726604
gntT	1.57746	1.42237	20.8503	1.19438	0.950242	0.731457
yfdC	1.57349	0.96482	21.8126	0.748751	0.9379	0.733003
trkH	1.5347	0.953389	20.312	0.70145	0.949092	0.734285
ybhF	1.68982	2.01037	21.6933	2.04488	0.971943	0.73523
mdtD	1.64855	1.11121	21.1009	0.988055	1.01538	0.736137
uhpC	1.46202	1.53058	21.7688	1.31803	0.864818	0.737739
ptsP	1.73216	0.98495	21.3444	0.799159	1.04278	0.740052
ansP	1.66036	1.35567	22.211	1.28188	0.987044	0.741445
emrY	1.50862	0.952083	21.315	0.791569	0.891585	0.742897
argO	1.85484	0.903437	20.8166	0.747209	1.12536	0.743193
ybhG	1.53212	0.630428	21.6236	0.617444	0.914189	0.748424
sstT	1.82683	0.442976	21.1111	0.37635	1.10337	0.748549
yhhS	1.57011	0.83782	21.1871	0.641517	0.953355	0.748558
proY	1.68994	0.738062	21.8438	0.579437	1.00811	0.749534
rarD	1.76575	1.37105	20.959	0.95832	1.07159	0.753025
ynfA	1.68582	0.230482	18.5211	0.325645	1.13523	0.754023
ybjL	1.77563	0.3509	21.9988	0.316371	1.07269	0.755956
hcaT	1.54735	0.836941	22.4065	0.669992	0.897285	0.756388
nanT	1.90949	0.593636	23.2731	0.486912	1.08819	0.756423
fryC	1.86631	0.524371	22.7395	0.55736	1.1079	0.75908
ynfM	1.83801	0.31898	22.1721	0.279605	1.12801	0.760502
fetB	1.54687	1.36062	20.7697	1.09093	0.951729	0.760884
mdtB	1.70703	1.56899	22.8048	1.23861	1.01359	0.761224
plaP	1.75208	0.738403	21.9556	0.569141	1.07074	0.76669
fruA	1.65861	0.760018	21.5089	0.620831	1.00627	0.767743
clcB	1.60577	1.11717	21.5297	0.864737	0.970821	0.767922
yrbG	1.75214	0.499673	21.9796	0.395931	1.04242	0.76818
zitB	1.73609	0.330817	22.0137	0.283971	1.05818	0.769277
ydjX	1.50757	0.691575	21.8014	0.564259	0.908794	0.770787
kgtP	1.69987	1.34707	22.248	1.08782	0.986952	0.771928
nupG	1.74092	0.375444	21.3477	0.307665	1.06303	0.77224
glvC	1.52353	0.952799	22.2819	0.811599	0.886916	0.772746
mdtK	1.84615	0.420297	22.2358	0.487887	1.12716	0.775084
soxR	1.53009	0.628166	21.6399	0.502545	0.932767	0.775335
mscS	1.82892	0.319172	22.2362	0.260557	1.11003	0.775525
dlsT	1.69054	1.40313	22.2694	0.980882	1.02924	0.776848
cysP	1.7544	1.62079	22.4281	1.38689	1.05813	0.779117
lsrC	1.46201	0.669575	22.0376	0.606524	0.901575	0.77985
kdpD	1.70268	0.523499	22.0332	0.495678	1.01327	0.781866
yaaJ	1.79873	0.367364	22.4267	0.325821	1.11168	0.78246
yddA	1.68815	0.945237	22.756	0.736137	0.990765	0.78343
eamA	1.69798	0.860231	21.6933	0.654898	1.00154	0.784338
ygjI	1.84931	0.913387	22.2862	0.705023	1.11192	0.78725
tnaB	1.56903	1.03871	24.3423	0.774384	0.906879	0.791576
ybiR	1.65206	1.04748	23.6376	0.893453	0.991177	0.791775
manY	1.55671	1.07131	20.1418	0.988714	1.10758	0.792624
metI	1.70944	1.03349	21.6816	0.877019	1.01199	0.792822
mscL	1.90053	0.894602	20.7763	0.800756	1.17339	0.795344
aqpZ	1.8421	0.924867	22.3913	0.829695	1.08066	0.796219
dcuB	1.85943	0.678003	22.8813	0.549762	1.10757	0.797079
sgcC	1.7904	0.5636	22.6965	0.407808	1.08573	0.797231
nikC	1.58598	1.3964	23.2285	1.11746	0.965645	0.798923
ycaD	1.60991	0.544987	23.0564	0.535596	0.980693	0.800182
clcA	1.44768	0.868428	21.8279	0.671507	0.89007	0.80054
narK	1.56181	1.13796	22.6954	1.04123	0.932816	0.80137
fryB	1.45771	1.01076	23.0588	0.774245	0.8793	0.801529
livK	1.62887	1.52645	22.3284	1.16839	1.00101	0.801614
dctA	1.56203	1.84305	22.8576	1.60885	0.948285	0.802782
nepI	1.52085	1.02206	23.763	0.842646	0.893072	0.803129
yqcE	1.73773	0.402786	23.2775	0.361991	1.06208	0.803418
ykgG	1.51248	0.899267	21.926	0.706718	0.930861	0.803469
dhaM	1.66328	1.24142	24.0979	0.98444	0.992367	0.807297
gntP	1.85739	0.312267	23.3085	0.245306	1.12942	0.807953
yahN	1.64961	1.27323	24.0888	0.928167	0.984994	0.808748
ugpA	1.9296	0.325437	24.0081	0.269145	1.16185	0.809742
nupX	1.73926	0.565105	23.4799	0.522826	1.05734	0.810036
yheS	1.53861	1.04641	22.6667	0.796338	0.951079	0.810362
nlpA	1.59468	1.40006	22.8254	1.22992	0.938704	0.8147
yccS	1.5557	0.953037	22.254	0.747467	0.961886	0.814873
dauA	1.69256	0.703433	24.4115	0.593457	1.005	0.815595
frwD	1.69736	0.696672	23.0626	0.504332	1.05762	0.816704
zntA	1.74743	0.377747	23.6219	0.32943	1.01788	0.819278
yjbB	1.67452	1.17423	22.5114	1.04806	0.982543	0.821384
dtpA	1.556	0.863753	23.6385	0.946692	0.950757	0.822586
yfbS	1.6351	0.695009	23.2248	0.595939	0.998672	0.822778
yehY	1.61549	0.574221	24.1521	0.483242	0.981761	0.827748
ttdT	1.56885	0.748213	23.5805	0.590823	0.966962	0.828817
dppB	1.46948	1.27539	24.1853	1.04558	0.897461	0.831205
yegH	1.55775	1.02274	23.5138	0.719047	0.965614	0.839144
cvrA	1.73551	0.64512	25.9671	0.512627	0.993619	0.842083
aaeA	1.66311	0.578578	24.8014	0.474279	0.990209	0.842415
gudP	1.59965	0.785592	23.2676	0.593361	0.982876	0.843102
mhpT	1.72743	1.0404	25.539	0.71533	0.999455	0.844499
mlaE	1.60559	0.55066	22.9599	0.423862	0.964272	0.84636
arnF	1.7256	1.33641	23.1566	1.04518	1.05951	0.846401
ybbP	1.60867	1.09031	25.2818	0.943099	0.938959	0.846736
emrD	1.7511	1.41116	25.0662	1.03417	1.05022	0.847612
ydjK	1.47911	1.36953	24.4511	1.3966	0.886307	0.847918
modF	1.85481	0.317352	23.2751	0.267595	1.1432	0.849025
yebQ	1.59974	0.865652	21.1	1.30606	1.01956	0.8494
ydiK	1.59586	0.945705	24.6222	0.802388	0.969907	0.849471
yqgA	1.57653	1.0196	22.3381	0.842844	0.948581	0.850325
acrF	1.67042	1.06411	24.8639	1.05126	0.987748	0.850394
alx	1.68586	0.903128	24.4544	0.698425	1.01416	0.85153
bcr	1.7291	1.16387	23.973	0.865881	1.03579	0.853437
dcuD	1.79484	0.612047	23.1308	0.543236	1.11865	0.854223
yjjP	1.68365	1.10714	24.5057	0.798169	0.988774	0.85536
atpI	1.79082	0.927017	24.8724	0.70397	1.06127	0.855434
dtpD	1.87409	0.512345	25.4374	0.407106	1.12833	0.856567
ydcO	1.55766	1.04566	23.0503	0.902879	0.974828	0.856761
cadB	1.67215	1.33038	23.9492	1.15372	1.03107	0.857315
sapF	1.57125	1.0176	24.3486	0.850995	0.974229	0.857707
nimT	1.74451	0.9453	24.5029	0.724785	1.02742	0.859414
yibH	1.81918	0.794408	23.6429	0.591175	1.08344	0.8612
adeQ	1.62173	1.25409	23.607	0.912452	0.99398	0.863319
sufB	1.60953	1.2998	24.3876	0.937172	0.999641	0.863954
ascF	1.64674	0.436037	23.2853	0.360909	1.01292	0.864831
yphD	1.74663	0.413959	23.9875	0.361669	1.10004	0.867319
yihO	1.69556	1.37369	24.3365	1.12619	0.989179	0.867911
ynjB	1.69053	0.902985	23.976	0.687233	1.03009	0.86924
ydhP	1.703	0.526411	24.3561	0.540658	1.0978	0.869368
araH	1.9513	0.346249	24.174	0.317771	1.19428	0.869473
setB	1.68356	1.072	25.3287	1.01799	1.01321	0.869481
uacT	1.61653	1.39686	26.3756	1.12198	0.956987	0.870113
agaV	1.85974	0.632687	25.2344	0.528488	1.12501	0.870701
yidE	1.68866	1.10204	26.5224	0.904975	0.975447	0.871557
setC	1.81351	1.15029	25.1227	1.07598	1.08259	0.871817
atpB	1.65753	0.805594	25.2203	0.645829	1.01072	0.873688
yadI	1.81148	0.365711	23.7027	0.347983	1.18413	0.875546
yhfK	1.75418	1.16571	23.605	0.998794	1.06767	0.875819
ypjA	1.59043	1.12787	24.3422	0.973067	0.962442	0.878132
ynjD	1.59003	1.09117	24.2914	0.954548	0.965472	0.880004
phnL	1.74243	1.11445	24.6952	0.976053	1.02631	0.880481
yhdY	1.51302	1.24761	24.9317	1.0248	0.915004	0.881371
ygaZ	1.75689	0.198596	22.2001	0.192429	1.27622	0.881754
yijE	1.50577	1.10878	25.3119	0.915943	0.915146	0.882086
arsB	1.70369	1.02357	26.2419	0.846425	0.991747	0.882125
mdlB	1.67303	1.34195	26.5598	0.9722	0.978505	0.883489
yhjV	1.72306	0.877068	24.5348	0.677092	1.03663	0.884495
eamB	1.91462	0.629189	26.593	0.51245	1.13887	0.886399
mlaC	1.69164	0.793613	25.9929	0.644424	1.0105	0.887636
ddpF	1.6732	1.15571	27.217	0.928077	0.971195	0.887641
yjeM	1.6785	1.09057	25.2568	0.884501	1.03772	0.888763
ulaA	1.92996	1.15972	25.3595	0.834807	1.14483	0.889761
sgcA	1.48137	0.938149	24.3367	0.693109	0.927846	0.890011
hsrA	1.80224	1.04389	24.5472	0.878784	1.07018	0.892035
artJ	1.8769	0.311288	24.0436	0.276681	1.27158	0.896811
yajR	1.60884	0.882918	24.0204	0.776212	1.01161	0.897656
hisM	1.66772	1.0627	25.5418	0.936633	0.994739	0.898869
thiP	1.82329	0.411255	26.0174	0.346888	1.11811	0.899884
yhjE	1.84105	0.49572	25.0426	0.435125	1.14266	0.899984
yjiJ	1.72779	0.839835	26.201	0.663603	1.00728	0.901041
tdcC	1.55534	1.61591	26.2178	1.33624	0.918073	0.902062
yhdW	1.88011	0.545962	26.0339	0.388571	1.13446	0.902082
lplT	1.86753	0.694724	25.3843	0.740278	1.1557	0.903498
ytfT	1.58711	1.13077	25.5857	0.824201	0.973785	0.903625
rbbA	1.83027	1.32704	25.4864	1.12782	1.09333	0.903912
mdtF	1.58646	0.806798	24.7205	0.699903	0.976424	0.904729
yicL	1.56295	1.23776	26.8878	0.955833	0.912286	0.904786
mltF	1.80694	0.420023	26.1903	0.335662	1.0942	0.906019
yhhT	1.66092	1.10422	26.7166	0.760733	1.00136	0.907436
cmtB	1.8529	0.546756	24.7605	0.461647	1.13058	0.90804
yhdP	1.94414	0.795381	27.2764	0.660396	1.13208	0.909705
frvB	1.95169	0.858025	25.9091	0.646725	1.15761	0.91059
rhtB	1.80301	1.01197	26.3377	0.71937	1.08153	0.913191
yhjX	1.68307	1.18204	26.612	0.891306	0.991697	0.913586
mgtA	1.90443	0.523127	24.8034	0.366871	1.26307	0.914478
frwB	1.8107	0.647605	25.5973	0.464042	1.11916	0.914841
tqsA	1.87138	0.49303	27.0101	0.447207	1.13418	0.915786
betT	1.7678	1.34189	26.8435	1.21067	1.03157	0.916447
yadH	1.80534	0.931238	26.6045	0.747314	1.07587	0.921394
yfeO	1.76028	0.73283	24.6282	0.564408	1.06354	0.923963
tolR	1.82284	1.73636	25.9956	1.50404	1.15474	0.924045
ygcS	1.73153	1.6787	27.5208	1.40715	1.00839	0.926382
lldP	1.77182	1.05041	26.7333	0.854046	1.04416	0.926949
ghxQ	1.70475	0.97204	25.6263	0.816777	1.03846	0.929721
corC	1.53566	1.4774	27.0325	0.991791	0.913563	0.929925
gdx	1.72064	0.98837	25.3401	0.812269	1.05972	0.930281
dcuA	1.54822	1.58396	26.8787	1.30313	0.951878	0.930485
tatC	1.85603	1.08261	26.9056	0.925142	1.09856	0.930604
fryA	1.55823	1.69996	25.3541	1.30588	0.980138	0.931192
yeeA	1.6596	1.39094	27.1456	1.1387	0.9634	0.933832
yjfF	1.72111	1.12705	24.4827	1.23107	1.04552	0.937154
ddpC	1.70697	1.28392	25.5896	0.906736	1.06621	0.937531
ytfF	1.76445	0.798351	26.2631	0.667455	1.08265	0.938225
galP	1.84929	1.43381	28.455	1.16338	1.05221	0.941958
yhbE	1.77337	0.695752	26.0164	0.572881	1.09482	0.942025
yicJ	1.80497	1.21135	28.3423	0.928263	1.08697	0.942941
eutH	1.57909	1.24431	25.7905	1.11377	0.988114	0.943952
macB	1.69329	0.733993	26.4149	0.698411	1.06678	0.944568
argT	1.63126	1.48068	25.9947	1.41183	1.11291	0.945748
dtpC	1.713	1.29098	28.4805	0.916389	0.999871	0.945791
ybaL	1.67087	0.565648	23.7699	0.579185	1.15511	0.946103
potB	1.8516	0.43236	26.1268	0.373877	1.12688	0.948146
dcuC	1.69341	1.05022	27.6828	0.900956	1.02603	0.951986
kdgT	1.57032	1.39618	27.6174	1.13837	0.966795	0.952436
yraQ	2.07393	0.505535	26.7264	0.46801	1.2368	0.953668
ydfJ	1.87064	0.954463	29.0203	0.703472	1.0962	0.953722
ssuC	1.67082	0.83967	24.9362	0.716982	1.14682	0.955361
ydiM	1.73815	0.77904	27.8001	0.669201	1.06445	0.956539
frvA	1.68246	1.60345	28.4918	1.15529	0.986649	0.957349
rutG	2.00812	0.938048	27.5174	1.06123	1.22921	0.958324
sapC	1.53164	1.03827	24.906	1.08019	0.920814	0.959375
yccA	1.78061	0.49944	25.3578	0.429998	1.13948	0.960137
focB	1.06504	0.394181	27.6594	0.33542	0.647083	0.963679
yfcC	1.92678	0.628276	27.9093	0.560614	1.17164	0.964025
ynjC	1.74913	1.2471	27.555	0.95462	1.06066	0.964996
crr	1.76899	1.05276	27.477	0.828752	1.06012	0.966234
yddG	1.96578	0.920389	28.2627	0.927207	1.18756	0.968216
yfeH	1.78003	1.30509	28.9205	0.974026	1.07702	0.968741
entS	1.71776	1.08371	29.0272	0.831948	1.01863	0.970416
tolQ	1.88149	1.73088	26.9726	1.91395	1.18526	0.975516
hofC	1.79622	1.40045	28.8145	1.09441	1.06085	0.978878
gltS	1.86355	1.28495	27.8369	0.964713	1.13011	0.981515
yneE	1.66816	1.28318	26.4649	1.16329	1.06681	0.983272
yhiD	1.66978	1.01342	27.9668	0.736637	1.00608	0.985146
ycaM	1.84937	1.38685	29.1135	1.12863	1.09815	0.986433
yggR	1.63287	1.43118	27.4517	1.14314	1.00992	0.990054
yjhF	1.58044	1.53452	27.7978	1.37823	0.964703	0.991199
gntU	1.88534	1.19602	29.9994	0.954639	1.1311	0.992614
bglF	1.87827	1.37207	30.4568	1.06702	1.05785	0.995032
yghF	1.70479	1.32181	28.0718	1.00168	1.03179	0.995282
yhdZ	1.79548	1.20858	30	1.05447	1.04756	0.996795
rhmT	1.83151	1.47822	28.1185	1.21465	1.10938	0.997787
ydcT	1.65002	1.04727	27.42	0.79503	1.03638	0.99928
ybaE	1.62024	1.45507	28.3662	1.15051	0.978599	0.999955
rbsC	1.92222	1.03909	30.6259	0.849006	1.12501	1.00134
ybhS	1.70903	0.756457	27.5104	0.758139	1.11416	1.00233
yghE	1.70961	0.987091	27.3563	0.776983	1.03033	1.00356
ddpD	1.8577	1.01694	27.7155	0.772891	1.13189	1.00406
lptB	1.79467	1.06839	26.8303	0.894375	1.11333	1.00433
sgcB	1.96377	1.13959	29.0246	0.883434	1.19441	1.00666
ygaY	1.87126	1.17394	28.8792	0.876986	1.10614	1.00711
yjhB	1.57859	1.44441	27.9316	1.15807	0.97871	1.00797
kup	1.69393	1.41147	28.1797	1.0673	1.0251	1.0085
yhgE	1.8051	0.793367	27.774	0.568696	1.08578	1.00855
yhdX	1.7582	1.61154	28.8061	1.17416	1.08055	1.0089
yphF	1.95069	0.611543	29.5935	0.540906	1.18409	1.01185
mdtI	1.83462	1.53759	27.8825	1.60013	1.06224	1.01639
guaB	1.73172	1.0123	28.7655	1.10533	1.05285	1.01674
ydgI	1.91414	1.44151	30.2742	1.07569	1.14448	1.03031
perM	1.7304	1.41116	27.5911	1.1725	1.08655	1.03741
cydD	1.72567	1.09727	28.9553	0.843854	1.04338	1.03819
shiA	1.92295	1.41239	31.5215	0.996496	1.1414	1.04065
zntB	1.67584	1.42166	29.9068	1.06504	1.03383	1.04143
dgoT	1.9966	1.46187	31.2921	1.18331	1.18197	1.04214
mscM	1.90652	1.2448	30.4672	1.02263	1.10811	1.04223
pitA	1.75204	1.4934	28.1679	1.16222	1.08045	1.04239
narU	1.94127	1.70627	31.3222	1.31467	1.1335	1.0448
ybiO	1.53116	1.53824	26.8918	1.67875	1.01059	1.04495
glpT	1.96134	1.48445	29.8077	1.31054	1.13034	1.04621
atoE	1.81679	1.37806	28.303	1.14031	1.11778	1.05158
yegT	1.87139	1.60938	30.2229	1.47653	1.10011	1.05185
znuB	1.78777	1.60929	30.6378	1.44007	1.06419	1.05307
adeP	1.92662	1.34118	30.5734	1.10499	1.11838	1.05564
araE	1.85435	1.09164	30.8849	0.932365	1.11063	1.05629
ycjN	1.63891	1.75641	29.3351	1.42707	0.98956	1.05989
rcnB	1.78275	1.37034	29.764	1.00836	1.10268	1.06178
idnT	1.89775	1.26574	31.6808	1.11418	1.10311	1.06383
yhhJ	1.78386	1.43063	31.1487	1.04503	1.08395	1.06404
mdtN	1.86601	1.36987	30.5467	1.09048	1.1018	1.0642
ybhI	2.01729	0.840897	31.426	0.783102	1.21525	1.0697
actP	1.99315	1.54633	30.1996	1.17658	1.15823	1.07295
kefB	1.83494	1.44871	29.2098	1.14577	1.14225	1.07669
ycjV	1.77011	1.12074	28.2499	0.962357	1.11225	1.08387
yddB	1.69222	1.31254	29.6251	0.926752	1.06337	1.0873
yidK	1.98921	1.24115	32.6437	0.902837	1.16482	1.09153
sapD	1.59382	1.44432	26.9428	1.59384	0.994599	1.0917
fieF	1.94179	1.33996	31.7733	1.02959	1.1339	1.09215
tyrP	1.88654	1.46612	31.4468	1.22208	1.14743	1.09519
yjcE	2.09357	1.49379	32.3628	1.33218	1.18598	1.09873
livH	1.93222	1.45744	31.1356	1.22055	1.1752	1.10128
rhtC	1.80391	1.30536	31.5831	0.935139	1.09318	1.10845
ycjO	1.84023	1.51378	31.4711	1.39242	1.14169	1.11075
srlA	1.79366	1.28739	30.6196	1.09646	1.08485	1.11921
mdlA	1.85273	1.75489	31.4682	1.4936	1.13298	1.12046
yghD	1.98662	0.905671	31.7886	0.71558	1.19794	1.12954
ycfT	1.93378	1.59969	31.3193	1.38648	1.15925	1.13137
potE	1.79154	1.5451	31.6316	1.31145	1.11442	1.13623
yadG	1.66323	1.4145	29.7677	1.11128	1.01437	1.13625
ytfL	1.87773	1.75588	32.1318	1.42011	1.10443	1.13638
brnQ	1.80831	1.63844	31.0892	1.36775	1.1044	1.13657
yeeE	1.85307	1.30782	30.6683	1.04757	1.10578	1.13711
yihN	1.99821	1.49834	32.9897	1.27614	1.1634	1.13772
ygiS	1.89693	1.70112	33.0406	1.29144	1.16276	1.1435
lsrA	1.93768	1.64658	32.8966	1.3959	1.13623	1.1436
adiC	2.0578	1.77529	33.8117	1.50494	1.18269	1.15978
ydjN	2.00782	1.57195	33.9992	1.35477	1.17098	1.16119
ydcS	1.77368	1.38963	28.4828	1.79942	1.05872	1.16492
ybiT	2.03282	1.42594	34.0632	1.20592	1.19299	1.16645
yohK	1.86663	1.2616	30.3784	1.05752	1.12307	1.1672
sapB	1.78632	1.42567	30.0552	1.43746	1.1516	1.17223
kch	2.04756	1.39715	33.5319	1.26997	1.22807	1.17915
oppB	1.82691	1.54232	31.6937	1.49406	1.12515	1.17981
frwC	1.98793	1.70478	33.5105	1.324	1.22468	1.18189
btuC	1.98322	1.725	33.7972	1.72552	1.19642	1.18637
gadC	2.09571	1.75863	35.4993	1.60718	1.24434	1.2006
modB	1.96838	1.60663	33.8444	1.25403	1.21895	1.20326
xylE	2.07662	1.73064	34.8417	1.44563	1.22748	1.20342
dinF	2.12211	1.46931	34.3467	1.14757	1.26691	1.20845
glvB	2.05369	1.67323	34.6342	1.59643	1.2027	1.21019
kefC	1.91599	1.69631	33.2948	1.4225	1.15479	1.21299
fepD	1.9522	1.77565	33.7385	1.5528	1.22515	1.21489
mdtG	2.12431	1.6114	35.2623	1.54274	1.28295	1.21948
artI	2.21302	1.45825	35.1741	1.13528	1.2928	1.22009
lysP	2.13059	1.67709	35.6277	1.45614	1.26633	1.22103
glnP	2.13657	1.37045	35.986	1.29245	1.29069	1.22829
corA	2.06349	1.65387	33.9594	1.56239	1.20943	1.23352
artQ	2.1243	1.65602	36.0791	1.5139	1.28609	1.2364
fetA	2.11282	1.32343	34.4096	1.21523	1.2862	1.237
nagE	1.98879	1.05578	33.0515	0.932472	1.27166	1.24481
aroP	2.07736	1.63894	34.8146	1.40458	1.25805	1.24649
ptsG	2.14206	1.73547	35.5476	1.54001	1.28862	1.2466
ybbA	2.00976	1.2882	34.0744	1.17944	1.22738	1.2479
setA	2.33349	1.37019	36.3559	1.15361	1.36673	1.25303
codB	2.13657	1.35947	35.5483	1.10739	1.26661	1.25371
ybaT	2.12129	1.32532	35.1366	1.18319	1.30638	1.26657
chaA	1.93754	1.60309	32.9468	1.59149	1.23381	1.26712
ccmC	1.96916	1.52363	33.5752	1.46953	1.25733	1.27023
acrB	2.17714	1.83134	34.8712	1.51217	1.29799	1.27234
malX	2.09069	1.85023	35.2941	1.45716	1.3135	1.2746
araJ	2.06329	1.55813	35.7223	1.27256	1.26179	1.27742
mdfA	1.95628	1.83461	33.8556	1.48119	1.24379	1.27917
ddpB	2.1589	1.5248	35.8426	1.56348	1.30788	1.28041
torT	1.99783	1.66305	34.4524	1.39722	1.25126	1.2811
ycjP	2.24599	1.66532	37.8079	1.34377	1.33705	1.28312
sapA	2.13335	1.45126	36.0267	1.20531	1.34235	1.28882
sbp	1.97635	1.33768	33.8022	1.0671	1.25056	1.30142
putP	2.31379	1.61612	38.243	1.57185	1.37459	1.30204
chbC	2.09122	1.60067	35.6496	1.33672	1.31622	1.3022
glpF	2.21363	1.52988	37.2447	1.27377	1.34808	1.30245
nhaB	2.15156	1.62758	36.3261	1.4685	1.32997	1.3038
ydcV	2.13578	1.63343	37.2388	1.26969	1.29629	1.30877
wt	1.67359	1.25533	40.5069	0.876459	0.943407	1.31162
caiT	2.2462	1.48482	37.7529	1.16547	1.35704	1.31609
sotB	2.12689	1.63911	36.5259	1.30265	1.30766	1.31741
yaaU	2.12702	1.63267	36.2181	1.38605	1.32177	1.31838
ettA	2.23965	1.73863	38.6698	1.2563	1.31325	1.31895
ydjE	1.99249	1.83898	32.8576	1.85521	1.27895	1.3218
pstC	2.25903	1.43344	38.2602	1.34276	1.34083	1.32275
cynX	2.09868	1.5997	36.3179	1.47976	1.27169	1.3245
uidB	2.19235	1.69806	38.0758	1.34394	1.32502	1.33059
amtB	2.24847	1.64711	37.11	1.46747	1.38473	1.33107
wzxE	2.20127	1.55225	37.9467	1.31119	1.32747	1.34084
copA	2.13032	1.62789	36.8759	1.41253	1.28858	1.34788
mglC	2.32484	1.75028	38.0518	1.6376	1.4271	1.35076
phnK	2.29833	1.77935	38.2048	1.47816	1.36162	1.35172
uup	2.14657	1.72942	36.5499	1.64308	1.33436	1.35448
kdpA	2.27398	1.78638	37.9517	1.46544	1.37527	1.3575
xapB	2.09569	1.81074	36.4826	1.5714	1.30809	1.35855
focA	2.18962	1.59522	38.5397	1.34676	1.32818	1.37081
mscK	2.17304	1.63184	37.4394	1.4197	1.30567	1.37501
gsiC	2.22993	1.82428	38.3533	1.71817	1.38716	1.3912
citT	2.30499	1.73246	38.3121	1.68385	1.41155	1.40062
gltK	2.14754	1.49146	38.0166	1.24485	1.3332	1.40641

## Sheet: Chloramphenicol
Strain	MaxOD	Rate	AUC	Normalized MaxOD	Normalized Rate	Normalized AUC
uup	1.29532	0.461062	8.94743	0.438043	0.805205	0.331579
ybjJ	1.5574	0.508749	12.0831	0.425286	0.942372	0.415098
ycaD	1.40743	0.289458	11.977	0.28447	0.857345	0.415668
chaA	1.28402	0.271878	10.8213	0.269912	0.817656	0.416183
rutG	1.44763	0.305794	12.0724	0.34595	0.886125	0.420435
yqgA	1.07335	0.596486	11.2575	0.493078	0.645824	0.428532
sapC	1.41184	0.333814	11.4243	0.347295	0.848796	0.440063
corC	1.54848	0.676834	12.9845	0.454363	0.921185	0.446672
ybhS	1.23571	0.357735	12.3561	0.35853	0.805594	0.450188
mdfA	1.47173	0.355157	12.0384	0.28674	0.935715	0.454846
yjfF	1.39851	0.409084	12.2529	0.44684	0.849548	0.46902
rhtA	1.43317	0.462907	13.7377	0.380069	0.875161	0.46982
ybaL	0.989829	0.464325	11.939	0.475438	0.684294	0.475201
ynfA	0.939069	0.493664	11.953	0.697491	0.632368	0.486624
ydhP	1.4035	0.325358	13.8722	0.334164	0.904735	0.495154
ygaZ	0.92005	0.449151	12.5866	0.435204	0.668333	0.49992
acrB	1.48284	0.483715	13.7956	0.399412	0.884054	0.503359
ptsN	1.27238	0.326609	13.394	0.33161	0.808349	0.50621
dtpA	1.32572	0.27302	14.7865	0.299236	0.810048	0.51455
mlaC	1.5142	0.43424	15.0794	0.352608	0.904507	0.514949
ybbP	1.62899	0.539859	15.7094	0.466968	0.950814	0.526138
srlA	1.41172	0.472875	14.466	0.402744	0.853847	0.528764
ypjA	1.4817	0.361065	14.7828	0.311508	0.896646	0.533283
macB	1.39802	0.387263	14.9354	0.36849	0.880754	0.534073
cusA	1.55165	0.338293	15.7465	0.349436	0.920879	0.535255
pstC	1.54203	0.366553	15.5383	0.343367	0.91526	0.537201
argO	1.55539	0.497237	15.1685	0.411251	0.94368	0.541545
sapB	1.35377	0.301152	13.8886	0.303642	0.87274	0.541688
fryC	1.44271	0.35717	16.3896	0.37964	0.856435	0.547109
yjhF	1.36148	0.285832	15.3698	0.25672	0.831049	0.548046
yadI	1.53233	0.428963	14.9392	0.408169	1.00165	0.551833
yehW	1.42271	0.338997	15.6361	0.352392	0.879828	0.553665
setB	1.48827	0.35589	16.2194	0.337958	0.895684	0.55678
leuE	1.49976	0.507631	16.4425	0.45041	0.915502	0.563956
ybhF	1.57955	0.439272	16.7889	0.446814	0.908519	0.569011
ybhN	1.45594	0.398529	16.7763	0.355056	0.899429	0.569162
ybiR	1.51347	0.453589	17.0473	0.386889	0.90803	0.571023
ydhJ	1.48575	0.51911	16.4834	0.478037	0.911281	0.571176
yejE	1.48366	0.382339	17.0386	0.343531	0.897296	0.572818
artJ	1.36319	0.28295	15.3716	0.251493	0.923544	0.573353
ptsG	1.52065	0.48932	16.8302	0.434212	0.914795	0.59021
mlaE	1.55408	0.449103	16.0712	0.34569	0.933336	0.592423
ybbW	1.51854	0.494944	16.3368	0.431796	0.938345	0.593638
ddpB	1.45737	0.387315	16.6182	0.397142	0.882886	0.593654
ydiK	1.48866	0.539889	17.3125	0.458071	0.904758	0.597284
mdtK	1.52639	0.432232	17.1962	0.501742	0.931933	0.599417
yfcJ	1.50845	0.400667	16.9141	0.406321	0.941476	0.601184
mglC	1.43933	0.39427	16.9395	0.368887	0.883531	0.601316
ycaM	1.53437	0.500274	17.7775	0.407128	0.911098	0.602344
yggT	1.47724	0.447548	16.4621	0.376825	0.933897	0.603213
lplT	1.48523	0.386652	17.011	0.412006	0.919119	0.60547
ybiO	1.43098	0.508594	15.6728	0.555053	0.944469	0.609003
mscS	1.47958	0.447152	17.4934	0.365034	0.898001	0.610109
yebQ	1.49164	0.415226	15.1645	0.626476	0.950669	0.610461
frwD	1.51818	0.464503	17.318	0.336262	0.94597	0.613275
yiaN	1.46296	0.522238	16.8953	0.410357	0.896172	0.613386
yejB	1.36943	0.350439	16.6288	0.352488	0.879774	0.615233
gsiC	1.46441	0.449814	16.9642	0.42365	0.910955	0.61535
ynjC	1.48676	0.481289	17.5813	0.368414	0.901561	0.615709
ddpD	1.54593	0.372124	17.0075	0.282822	0.941935	0.61614
ugpA	1.5123	0.629408	18.3841	0.520537	0.910583	0.620056
btuC	1.50048	0.491623	17.6977	0.491773	0.905197	0.621232
artQ	1.44206	0.511363	18.1659	0.467479	0.873045	0.62253
ansP	1.49689	0.541968	18.6492	0.512469	0.889865	0.622547
ydcU	1.55935	0.369989	18.4205	0.291477	0.923902	0.623523
mscL	1.47375	0.380412	16.3183	0.340506	0.909897	0.624685
rcnA	1.52536	0.460806	18.0404	0.376586	0.929622	0.625196
aqpZ	1.52513	0.414111	17.6384	0.371497	0.894716	0.627209
argT	1.47234	0.356529	17.2655	0.339951	1.00449	0.62816
frvA	1.55529	0.67168	18.6987	0.483947	0.912077	0.628292
gntU	1.52612	0.489011	19.1026	0.390317	0.915585	0.632064
lysP	1.51033	0.460808	18.5038	0.400099	0.897677	0.63416
plaP	1.48783	0.588515	18.1974	0.453611	0.909244	0.635451
tolQ	1.3865	0.509417	17.5961	0.563297	0.873437	0.636398
mdtI	1.5407	0.444368	17.4602	0.462442	0.892062	0.636472
yiaV	1.53485	0.437539	18.8456	0.357276	0.911534	0.638863
yhdZ	1.54061	0.418602	19.2627	0.365224	0.898857	0.640032
mdtJ	1.54355	0.470755	18.8661	0.44918	0.934366	0.642824
ybhG	1.51771	0.372773	18.5909	0.365096	0.905589	0.643456
znuB	1.5193	0.416412	18.737	0.372627	0.904383	0.644017
ssuC	1.45876	0.443028	16.818	0.378295	1.00126	0.644335
ptsI	1.64374	0.379606	18.6342	0.283729	0.932942	0.645617
amtB	1.45032	0.420719	18.0168	0.374836	0.893184	0.646233
manY	1.42477	0.44103	16.4232	0.407027	1.0137	0.646289
yhhT	1.47063	0.672886	19.0605	0.463572	0.886635	0.647394
putP	1.48695	0.423725	19.0213	0.412116	0.88338	0.647613
gdx	1.45342	0.417369	17.7005	0.343005	0.895142	0.64982
yhhS	1.48288	0.561957	18.4112	0.430289	0.900391	0.650484
yfdC	1.51384	0.551917	19.3896	0.428316	0.902345	0.651581
ybaT	1.45469	0.430395	18.0937	0.384237	0.89586	0.652225
yddA	1.52696	0.510101	18.9472	0.397259	0.896164	0.652301
uraA	1.41277	0.420264	18.7587	0.421876	0.874682	0.65279
yfeH	1.53556	0.481969	19.5022	0.359707	0.929101	0.653259
yghE	1.48107	0.452074	17.8107	0.355847	0.892587	0.653383
atpI	1.53954	0.626104	19.0041	0.475459	0.912362	0.653608
fetA	1.45739	0.514697	18.1913	0.472616	0.887198	0.653965
mhpT	1.49032	0.700688	19.8059	0.481761	0.862265	0.654921
mdtG	1.52805	0.519302	18.9378	0.497175	0.922852	0.65493
yaaJ	1.44835	0.420971	18.7839	0.373367	0.895133	0.655363
mdlB	1.55933	0.522176	19.7119	0.3783	0.912004	0.655699
phoR	1.53091	0.419857	19.5674	0.392068	0.896158	0.656423
ycfT	1.50922	0.388934	18.1849	0.337097	0.904737	0.656907
dtpD	1.55066	0.540971	19.5351	0.429852	0.933597	0.657815
garP	1.55632	0.413481	19.3585	0.384671	0.901816	0.658079
alx	1.47205	0.560211	18.9023	0.433234	0.885539	0.658201
yhjE	1.5202	0.417731	18.3243	0.36667	0.943524	0.658543
ydjE	1.40674	0.419282	16.3953	0.422983	0.902972	0.659549
ygdQ	1.38224	0.396921	18.4069	0.375999	0.862109	0.659904
xapB	1.49421	0.492451	17.7285	0.427359	0.932659	0.660178
yddB	1.5179	0.520687	18.0231	0.367643	0.953827	0.661485
livH	1.54175	0.641918	18.7351	0.537582	0.937707	0.662669
ydcS	1.53707	0.653652	16.2156	0.846406	0.917486	0.663202
cysW	1.45346	0.448631	18.0144	0.389198	0.926568	0.663565
ddpF	1.5988	0.745785	20.3643	0.598895	0.92801	0.664149
yhbE	1.51078	0.391875	18.3453	0.32267	0.932712	0.664264
yfjD	1.48998	0.55019	19.5182	0.418718	0.901911	0.664324
mdtL	1.52393	0.417943	18.4548	0.390956	0.909639	0.665022
arnF	1.47616	0.561733	18.2205	0.439321	0.906351	0.665981
yegT	1.50967	0.429926	19.1658	0.394436	0.887472	0.667031
uhpC	1.53529	0.47792	19.7004	0.411552	0.90816	0.667644
tolR	1.49154	0.435396	18.7938	0.377142	0.944865	0.668051
potB	1.55728	0.518429	18.4571	0.448303	0.94776	0.669811
ynjD	1.51853	0.511189	18.5091	0.447185	0.922057	0.67053
ghxQ	1.49231	0.589865	18.4845	0.495646	0.909053	0.670618
yccS	1.47057	0.450105	18.3317	0.353018	0.909248	0.67125
tyrP	1.54355	0.436823	19.2986	0.364113	0.93882	0.672105
ccmC	1.43456	0.46401	17.7814	0.447536	0.915988	0.672714
ygbN	1.4653	0.498239	19.0174	0.450315	0.907382	0.672831
tatC	1.47703	0.581631	19.4559	0.497032	0.874237	0.672933
fepD	1.44756	0.495834	18.6916	0.433606	0.908456	0.673065
kdpA	1.56341	0.486275	18.8404	0.39891	0.945529	0.673906
gadC	1.51652	0.578431	19.9382	0.528619	0.900439	0.674316
xylH	1.50561	0.494471	18.2031	0.411097	0.931516	0.674845
ydjK	1.56401	0.501084	19.4831	0.510988	0.937183	0.675639
proY	1.54763	0.452889	19.7033	0.355553	0.923217	0.676086
kdgT	1.49708	0.40308	19.605	0.32865	0.921702	0.676111
nepI	1.59055	0.463856	20.0258	0.382428	0.934	0.676822
narU	1.51186	0.641572	20.3069	0.494327	0.882769	0.677369
yqcE	1.5005	0.513358	19.6422	0.461363	0.917084	0.677947
yghD	1.5142	0.429366	19.0878	0.339247	0.913067	0.678242
yfbS	1.47549	0.447145	19.1466	0.383407	0.901186	0.678302
nhaB	1.52333	0.46869	18.9081	0.422879	0.94163	0.678642
yccA	1.51323	0.447525	17.9493	0.385302	0.96837	0.679622
dtpB	1.57656	0.49553	19.7846	0.41643	0.94726	0.681082
zntB	1.49525	0.480554	19.6302	0.360007	0.922424	0.683571
yhfK	1.47125	0.470778	18.4282	0.403368	0.895466	0.683744
eamA	1.5227	0.571648	18.9434	0.435198	0.898153	0.684914
eutH	1.46574	0.382807	18.7218	0.342645	0.917185	0.685232
fryA	1.48895	0.315052	18.6578	0.242018	0.936556	0.685255
yadH	1.51381	0.540143	19.7956	0.433462	0.90214	0.685581
cynX	1.55879	0.410804	18.8026	0.380006	0.94455	0.685721
lldP	1.6079	0.508708	19.814	0.413612	0.94756	0.687031
glnP	1.53465	0.498806	20.1467	0.470415	0.927073	0.687654
oppB	1.49934	0.475912	18.4828	0.461021	0.923409	0.688027
ygaY	1.62015	0.534738	19.7306	0.399474	0.957709	0.688069
sapA	1.52832	0.537884	19.2398	0.446726	0.961647	0.688286
nupX	1.525	0.422958	19.951	0.391314	0.927085	0.688292
yneE	1.53383	0.572627	18.5676	0.519129	0.980906	0.689857
dgoT	1.5503	0.482095	20.7272	0.390232	0.917767	0.690294
cvrA	1.65367	0.50539	21.2924	0.401594	0.946763	0.690487
yfcC	1.51906	0.541271	19.9909	0.482978	0.923712	0.690513
puuP	1.48615	0.514823	19.5381	0.426414	0.900381	0.690526
trkH	1.45444	0.567514	19.1144	0.417545	0.899463	0.690988
ybhI	1.46668	0.47184	20.3026	0.43941	0.883553	0.691071
yjbB	1.53829	0.452625	18.9514	0.403992	0.902603	0.691486
dauA	1.60294	0.568609	20.6985	0.479711	0.951787	0.691544
shiA	1.52626	0.670566	20.9487	0.473111	0.905933	0.691603
yhdX	1.49082	0.646543	19.7495	0.471068	0.916229	0.6917
dlsT	1.49895	0.670958	19.8544	0.469047	0.912596	0.692604
fetB	1.48119	0.522461	18.9276	0.418905	0.911317	0.693399
yiaM	1.54839	0.552599	20.7031	0.457082	0.926	0.693592
citT	1.53351	0.486329	18.9942	0.472684	0.939105	0.694394
fryB	1.5334	0.62402	19.9775	0.478001	0.924951	0.69442
yibH	1.53293	0.479225	19.0736	0.356625	0.912965	0.69476
yphD	1.52758	0.47706	19.2192	0.4168	0.962082	0.694913
cysP	1.52454	0.38347	20.0302	0.32813	0.919498	0.69582
ycjO	1.45666	0.49148	19.7158	0.452079	0.903718	0.695855
yghF	1.55766	0.667289	19.6525	0.505677	0.942743	0.696776
yphF	1.5354	0.528801	20.39	0.467721	0.932003	0.697168
yijE	1.50925	0.518246	20.0184	0.428115	0.917261	0.697613
yhjV	1.54789	0.433883	19.3513	0.334956	0.931245	0.697627
yddG	1.47457	0.35059	20.3711	0.353188	0.890811	0.697868
sgcA	1.51416	0.518951	19.0827	0.383403	0.94838	0.69787
cmtA	1.48629	0.50882	19.7484	0.441573	0.913107	0.698434
nimT	1.49306	0.612798	19.9226	0.469847	0.879329	0.698766
yedA	1.52573	0.413524	19.6728	0.370363	0.925251	0.698779
artI	1.55197	0.448341	20.1488	0.349043	0.906629	0.698904
yhhJ	1.50745	0.643582	20.464	0.470117	0.915987	0.69905
adeP	1.5654	0.424004	20.2702	0.349336	0.908698	0.699889
thiP	1.51733	0.541972	20.257	0.457145	0.930485	0.700645
yajR	1.51295	0.588219	18.7668	0.517129	0.951317	0.701326
ytfL	1.54308	0.592933	19.8494	0.479549	0.907598	0.702
ghxP	1.56283	0.451834	19.6698	0.371847	0.929774	0.702476
rbbA	1.56253	0.580419	19.8167	0.493286	0.933395	0.702827
nagE	1.4329	0.478626	18.6694	0.422724	0.916221	0.703143
yhdW	1.57813	0.547911	20.302	0.389958	0.952244	0.70347
sstT	1.57769	0.506538	19.8595	0.430352	0.952896	0.704171
yohK	1.46288	0.439555	18.3297	0.368451	0.880155	0.704264
ybbA	1.45595	0.529845	19.2376	0.485112	0.889162	0.704534
betT	1.52152	0.469249	20.6413	0.423361	0.887857	0.704702
dcuD	1.47343	0.469492	19.0881	0.416708	0.91833	0.704928
tehA	1.56228	0.396552	19.6741	0.414259	0.928361	0.705172
crr	1.59542	0.485459	20.061	0.382164	0.956101	0.705448
kch	1.5373	0.490819	20.0783	0.446141	0.922026	0.706056
yhdP	1.55914	0.524887	21.1747	0.435808	0.907889	0.706204
zitB	1.55474	0.53266	20.2149	0.457232	0.947648	0.706415
corA	1.59374	0.470822	19.4541	0.444779	0.934107	0.706642
tnaB	1.57204	0.63419	21.7478	0.472804	0.908618	0.707206
ygcS	1.62494	0.546525	21.0114	0.458118	0.946308	0.70727
frwB	1.56057	0.498806	19.7925	0.35742	0.964559	0.707378
dcuA	1.51439	0.611847	20.4419	0.503371	0.931076	0.707657
frvB	1.5521	0.583361	20.1433	0.439701	0.920595	0.707945
yhiD	1.48884	0.51275	20.0982	0.372709	0.89705	0.707969
yfdV	1.54751	0.456604	20.0548	0.485753	0.9365	0.708239
yjeM	1.49701	0.683945	20.1313	0.554709	0.925513	0.708402
ycjV	1.49489	0.468684	18.482	0.40245	0.939315	0.709106
chbC	1.50002	0.518066	19.4214	0.432636	0.94412	0.709416
araH	1.58832	0.630764	19.7433	0.578887	0.972118	0.710114
rarD	1.46208	0.6716	19.773	0.469425	0.887298	0.710413
ydjX	1.58297	0.467413	20.0943	0.381364	0.954244	0.710435
acrD	1.54622	0.412527	20.7622	0.368226	0.943388	0.710996
copA	1.47947	0.446836	19.4527	0.387724	0.894891	0.71103
acrF	1.55019	0.409653	20.7978	0.404707	0.916653	0.711327
araE	1.54226	0.546179	20.8058	0.466488	0.923709	0.711575
hcaT	1.52913	0.572937	21.0856	0.45865	0.886718	0.711798
ydgI	1.54118	0.585002	20.9202	0.436545	0.92149	0.711968
atoS	1.51837	0.525821	21.1742	0.514607	0.868815	0.712337
lptB	1.49352	0.493876	19.0309	0.413436	0.926512	0.712379
yehY	1.51725	0.506702	20.7866	0.426421	0.922056	0.712406
zupT	1.5873	0.680811	21.0694	0.527129	0.949256	0.712833
mtr	1.51715	0.561857	21.4932	0.502254	0.891523	0.712875
ydhC	1.44007	0.492809	20.9683	0.477202	0.878162	0.714338
mdtD	1.52572	0.452154	20.4827	0.402043	0.939729	0.71457
narK	1.54563	0.503907	20.2389	0.461076	0.923157	0.71463
mdtB	1.56537	0.63925	21.412	0.504643	0.929477	0.714731
mscK	1.54573	0.475248	19.4673	0.413465	0.928755	0.714964
hisM	1.53549	0.467156	20.3249	0.411737	0.915869	0.715278
tqsA	1.50039	0.482672	21.1065	0.437812	0.909337	0.715622
ynfM	1.54601	0.557121	20.8989	0.48835	0.948805	0.716832
yggR	1.47194	0.421921	19.8838	0.337003	0.910381	0.717115
adeQ	1.48957	0.613	19.6184	0.446006	0.912977	0.717453
gabP	1.55851	0.518755	21.1449	0.438352	0.925163	0.718359
yjiJ	1.58396	0.634948	20.8902	0.50171	0.923428	0.718404
yahN	1.55034	0.570464	21.4017	0.415859	0.925718	0.718531
yhgE	1.57981	0.554002	19.8017	0.397116	0.950268	0.719058
nlpA	1.51591	0.474187	20.148	0.416561	0.892332	0.719134
rcnB	1.50956	0.606145	20.1681	0.446029	0.933697	0.719465
ydiM	1.55738	0.551359	20.9148	0.473621	0.95374	0.719631
sotB	1.53218	0.530871	19.9583	0.421899	0.942024	0.719854
frwC	1.46219	0.612418	20.4113	0.47563	0.900793	0.71989
rhtC	1.48572	0.708874	20.5126	0.507827	0.900351	0.719916
ygaH	1.53214	0.530765	22.5003	0.451257	0.893052	0.722398
focA	1.50698	0.635441	20.3226	0.536472	0.914106	0.722851
yicJ	1.57518	0.69196	21.7532	0.530251	0.948585	0.723724
metI	1.53671	0.527681	19.8039	0.447789	0.909734	0.724164
yjjP	1.55797	0.618962	20.7651	0.446226	0.914966	0.724796
lsrC	1.47557	0.489598	20.483	0.443494	0.909935	0.724837
yhjX	1.23436	0.493082	21.1393	0.371802	0.72731	0.72571
ynjB	1.52871	0.593655	20.0326	0.451812	0.931488	0.726275
phnK	1.53519	0.593168	20.5398	0.492762	0.909511	0.726717
phnL	1.54592	0.441401	20.387	0.386587	0.910566	0.726875
galP	1.59731	0.631402	21.9732	0.512314	0.908836	0.727386
murP	1.49081	0.499998	20.7856	0.438712	0.908093	0.728012
adiC	1.59583	0.541147	21.2473	0.458738	0.917179	0.728808
ulaA	1.55602	0.681399	20.7882	0.490496	0.923016	0.729372
pheP	1.55315	0.534724	22.0249	0.428975	0.913994	0.729567
yihO	1.59988	0.428487	20.4608	0.351288	0.933361	0.72969
psuT	1.5061	0.448661	20.9101	0.412168	0.91649	0.729976
sgcC	1.53616	0.619931	20.7979	0.448568	0.931551	0.730538
emrD	1.51422	0.712344	21.6236	0.522044	0.908156	0.7312
uacT	1.56175	0.58297	22.1716	0.468254	0.924558	0.731425
yifK	1.59052	0.465	21.5894	0.390155	0.925226	0.732603
tdcC	1.55942	0.502065	21.2999	0.415173	0.920483	0.732854
clcB	1.50517	0.550722	20.5505	0.426284	0.909999	0.732998
ybhR	1.52753	0.612809	19.8575	0.520263	0.906393	0.733064
kdpD	1.52809	0.482885	20.6627	0.457223	0.909369	0.733232
sgcB	1.53658	0.533867	21.1446	0.413866	0.93458	0.733359
glpF	1.53534	0.641928	20.9803	0.534467	0.935009	0.733685
lacY	1.59848	0.568059	22.6803	0.466642	0.906706	0.733861
ycjP	1.5738	0.641937	21.649	0.517987	0.93689	0.734724
dtpC	1.55592	0.654151	22.1492	0.464342	0.90818	0.735539
rhtB	1.52272	0.685384	21.2163	0.487212	0.913406	0.735619
zntA	1.67191	0.425966	21.2122	0.371481	0.973893	0.7357
yojI	1.53939	0.598445	21.9397	0.48274	0.930068	0.735734
yeaV	1.52313	0.528259	21.2317	0.447392	0.916122	0.735792
sbp	1.46374	0.477618	19.1403	0.381008	0.926196	0.736921
sufB	1.50365	0.658052	20.8042	0.474463	0.93388	0.737008
ydcV	1.55504	0.580226	20.9866	0.451019	0.943813	0.737578
yegH	1.46911	0.645538	20.6809	0.453853	0.910668	0.738043
clcA	1.5066	0.555508	20.134	0.429543	0.926293	0.738417
brnQ	1.50871	0.481239	20.2018	0.401733	0.92142	0.738544
bcr	1.53706	0.648746	20.7569	0.482646	0.920756	0.738943
mtlA	1.59223	0.695286	22.665	0.545018	0.931439	0.739142
ytfT	1.50917	0.598971	20.933	0.436582	0.925964	0.7393
yjcE	1.60377	0.467323	21.7778	0.416765	0.908514	0.739364
setC	1.61099	0.394527	21.3097	0.369041	0.961694	0.739496
ydcO	1.55255	0.64863	19.9004	0.56006	0.971632	0.739684
sapF	1.50148	0.462866	21.0196	0.387083	0.93097	0.74044
soxR	1.56114	0.532719	20.6771	0.426186	0.951699	0.740839
proW	1.59782	0.52173	18.9572	0.646322	0.987947	0.741502
yihP	1.56966	0.64353	22.0277	0.550996	0.92705	0.742131
ybaE	1.54591	0.451005	21.0567	0.356605	0.933701	0.742281
gltK	1.50924	0.576107	20.0704	0.480852	0.936939	0.742498
yhdY	1.53173	0.610597	21.0078	0.501553	0.926318	0.742654
kgtP	1.56607	0.602621	21.415	0.486641	0.909267	0.743026
modB	1.52091	0.617769	20.8993	0.482191	0.941844	0.743028
mngA	1.63207	0.474152	22.059	0.43513	0.950085	0.74362
yeeO	1.55053	0.628579	22.1378	0.525859	0.922741	0.74406
malX	1.52468	0.631244	20.6089	0.497141	0.957904	0.744263
dppB	1.51028	0.540694	21.6779	0.443268	0.922379	0.745029
mdtH	1.52753	0.505048	20.6613	0.563705	0.921362	0.74518
gntP	1.57976	0.620528	21.4979	0.487466	0.960607	0.745191
uidB	1.5509	0.601513	21.3402	0.47607	0.937341	0.745751
pitA	1.49816	0.646239	20.1597	0.502925	0.923879	0.746035
xanQ	1.62265	0.579539	20.256	0.558693	0.991724	0.746718
kup	1.55844	0.5737	20.9048	0.433811	0.943101	0.748145
potE	1.51607	0.554841	20.8416	0.470936	0.943066	0.748645
agaV	1.63272	0.575148	21.7018	0.480425	0.987678	0.748813
rhaT	1.63224	0.641371	22.6909	0.514738	0.944379	0.749449
dctA	1.49714	0.517585	21.3452	0.451816	0.908892	0.749667
fucP	1.58941	0.52708	22.9295	0.471534	0.92994	0.75004
setA	1.61168	0.498221	21.7841	0.41947	0.943963	0.750803
cadB	1.5578	0.542383	20.9878	0.47036	0.960555	0.751305
aaeA	1.61677	0.565334	22.1242	0.463422	0.962622	0.75148
dhaM	1.56414	0.626837	22.4385	0.497079	0.933215	0.751706
yjhB	1.51707	0.564245	20.8317	0.452388	0.940569	0.751754
kefB	1.57377	0.533969	20.3977	0.42231	0.979668	0.751871
glvC	1.5636	0.626616	21.6933	0.533754	0.910242	0.752334
ampG	1.52803	0.486624	21.4476	0.44233	0.91128	0.752381
ygiS	1.51402	0.649128	21.7883	0.4928	0.928046	0.754072
nirC	1.56828	0.632853	21.64	0.538119	0.938909	0.754438
yidK	1.6241	0.584601	22.5885	0.425252	0.951026	0.755308
ptsP	1.60834	0.523653	21.8088	0.424877	0.968241	0.756153
bglF	1.63861	0.588379	23.1647	0.457566	0.922877	0.756796
yrbG	1.559	0.5526	21.6667	0.43787	0.927511	0.757244
ettA	1.57004	0.611413	22.2057	0.441797	0.920615	0.75739
agaC	1.49893	0.648617	21.5771	0.514828	0.928812	0.757425
torT	1.53327	0.566705	20.3748	0.47612	0.960301	0.757629
glvB	1.6104	0.536436	21.6874	0.511814	0.943098	0.757803
barA	1.55993	0.542865	21.7184	0.547602	0.939148	0.757821
hsrA	1.58827	0.467005	20.8717	0.393143	0.943122	0.758468
yicG	1.56854	0.670441	22.6226	0.52939	0.92191	0.758727
alsC	1.55065	0.576053	21.8752	0.449671	0.935697	0.759218
ykgG	1.51599	0.582559	20.7681	0.457823	0.93302	0.761036
yraQ	1.5358	0.486698	21.3588	0.450571	0.915884	0.762138
araJ	1.54251	0.573162	21.3148	0.468114	0.943306	0.762214
yicL	1.5606	0.557062	22.6705	0.43018	0.910917	0.762871
mdtN	1.58904	0.547843	21.906	0.436111	0.938262	0.763171
ytfF	1.56396	0.532752	21.3858	0.445403	0.959635	0.763988
ygjI	1.55131	0.585876	21.6284	0.452225	0.932742	0.764013
cmtB	1.53414	0.476132	20.8502	0.402017	0.936084	0.764638
ddpC	1.6167	0.632643	20.8708	0.446788	1.00983	0.764647
yeeA	1.62309	0.558026	22.2449	0.456831	0.942204	0.765244
lsrA	1.56488	0.538887	22.0158	0.456847	0.917623	0.765347
arnE	1.54471	0.487993	20.9118	0.541771	0.94744	0.765488
rbsC	1.62079	0.615453	23.4282	0.502864	0.948585	0.766008
feoB	1.5518	0.635326	21.0544	0.470461	0.952123	0.766189
ydiN	1.4505	0.531056	21.6638	0.434103	0.913535	0.767279
ydhK	1.53418	0.533559	22.1593	0.474333	0.919012	0.76759
gntT	1.52557	0.569722	21.8834	0.478402	0.918982	0.767701
yheS	1.49012	0.613545	21.5266	0.46692	0.921107	0.769601
yaaU	1.52262	0.534965	21.1556	0.454157	0.946186	0.770088
mepM	1.6557	0.639705	22.9622	0.510408	0.968614	0.770254
ydcT	1.53417	0.574299	21.1595	0.435978	0.963615	0.771127
ydfJ	1.63281	0.606234	23.4883	0.446815	0.956833	0.771919
caiT	1.57874	0.653574	22.1489	0.513006	0.953789	0.772124
fsr	1.63681	0.548525	22.8337	0.458867	0.949776	0.773252
rhmT	1.59979	0.632753	21.8175	0.519932	0.969026	0.774195
ybiT	1.60267	0.577451	22.6106	0.488351	0.940549	0.774271
mdlA	1.5371	0.57179	21.7717	0.486655	0.939969	0.775204
nupG	1.55648	0.568763	21.4303	0.466085	0.950409	0.775228
hofC	1.53866	0.640627	22.8203	0.500632	0.90874	0.775245
ybjL	1.5914	0.540856	22.5671	0.487634	0.961388	0.775485
aroP	1.59697	0.580447	21.6596	0.497447	0.967123	0.775496
yadS	1.56075	0.520372	22.0061	0.478902	0.949458	0.775517
nikC	1.51209	0.70947	22.5783	0.567747	0.920654	0.776558
nanT	1.68829	0.625746	23.9061	0.513249	0.962128	0.776996
uhpT	1.61085	0.588377	22.0169	0.443661	0.967643	0.777263
mltF	1.54798	0.580424	22.479	0.463847	0.937387	0.777633
yihN	1.64344	0.510637	22.5555	0.434912	0.956849	0.777873
tsgA	1.61361	0.557627	22.5923	0.439683	0.95021	0.778364
livK	1.55711	0.670968	21.7182	0.513577	0.956908	0.779709
dinF	1.56012	0.627002	22.1688	0.489705	0.931394	0.779981
ybbY	1.51765	0.531843	22.2613	0.47466	0.92873	0.781663
mdtO	1.63371	0.647669	24.1679	0.514692	0.91479	0.782019
codB	1.57717	0.550247	22.2124	0.448221	0.934983	0.78338
potH	1.61196	0.549392	22.431	0.478297	0.962955	0.783401
dcuB	1.58872	0.719735	22.5258	0.5836	0.946318	0.784696
gudP	1.51608	0.661561	21.6934	0.499679	0.931528	0.78606
ydeE	1.52254	0.730811	22.3051	0.611109	0.93056	0.787062
ttdT	1.54013	0.579135	22.4096	0.457312	0.949264	0.787664
yqeG	1.58391	0.590736	22.6331	0.486332	0.961303	0.788218
yoaE	1.51866	0.544206	22.3857	0.471579	0.932534	0.788761
actP	1.59099	0.594407	22.2095	0.452276	0.924527	0.789071
eamB	1.5363	0.624531	23.6745	0.508656	0.913839	0.789121
mdtF	1.50505	0.526449	21.5763	0.456698	0.926322	0.789658
fieF	1.61185	0.629533	23.0474	0.483715	0.941236	0.792212
guaB	1.53353	0.658538	22.4354	0.719058	0.932354	0.792993
ydjN	1.64363	0.544922	23.2234	0.469636	0.958583	0.793158
panF	1.62234	0.569913	23.598	0.443319	0.950204	0.793532
idnT	1.55946	0.524229	23.6722	0.461456	0.906468	0.794902
xanP	1.56398	0.630889	22.8981	0.476566	0.956806	0.795359
ydcZ	1.5441	0.717311	23.2331	0.623218	0.927925	0.795633
atoE	1.53105	0.541896	21.4365	0.448405	0.941976	0.79646
livJ	1.61035	0.478141	22.7692	0.455381	0.940783	0.796733
dcuC	1.61156	0.619741	23.1844	0.531659	0.976442	0.79729
emrB	1.62749	0.505736	22.6224	0.455017	0.956445	0.797591
kefC	1.54702	0.558261	21.9026	0.468148	0.932408	0.797955
perM	1.54167	0.567011	21.2251	0.471115	0.968039	0.798048
exbB	1.62027	0.659106	24.7837	0.552338	0.924331	0.798441
yidE	1.67333	0.587041	24.3045	0.482068	0.966596	0.798673
sdaC	1.61022	0.567653	22.9351	0.569035	0.953171	0.800386
exuT	1.64081	0.609348	23.3563	0.492583	0.979971	0.801558
arsB	1.67702	0.580643	23.8515	0.480152	0.976221	0.801772
melB	1.61969	0.573915	23.7471	0.491965	0.950868	0.802803
xylE	1.61291	0.572583	23.2437	0.478288	0.953378	0.802829
yeeE	1.60905	0.634401	21.6729	0.508156	0.960166	0.803582
yphE	1.64237	0.512636	22.8777	0.469219	0.965674	0.80397
atpB	1.60962	0.576778	23.2193	0.462392	0.981503	0.804369
glpT	1.60303	0.625675	22.9471	0.552374	0.923836	0.805408
entS	1.54823	0.628726	24.2019	0.482664	0.918101	0.809102
ycjN	1.5306	0.584372	22.3992	0.474798	0.924163	0.809297
frlA	1.51128	0.651895	23.1906	0.515888	0.924111	0.812878
treB	1.5414	0.647355	23.5884	0.535129	0.933961	0.813354
wzxE	1.57086	0.657607	23.0195	0.555485	0.947299	0.81339
yjeH	1.5653	0.572283	23.1868	0.476217	0.932047	0.814486
yfeO	1.60313	0.667048	21.7233	0.513744	0.968593	0.81498
yadG	1.56472	0.606163	21.3607	0.476222	0.954296	0.815348
focB	1.58288	0.626169	23.4587	0.532826	0.961706	0.817324
gltS	1.61033	0.634641	23.3682	0.476475	0.976556	0.823951
exbD	1.65534	0.637449	24.2799	0.548701	0.948664	0.826705
proP	1.68915	0.618487	25.606	0.505576	0.973219	0.827165
modF	1.61895	0.5848	22.7438	0.49311	0.997827	0.829643
phnD	1.51996	0.764284	23.8036	0.599711	0.927385	0.829655
wt	1.35487	1.16554	25.6523	0.813769	0.763746	0.830624
ascF	1.57455	0.604413	22.4433	0.500274	0.968516	0.833559
cycA	1.5974	0.62352	24.935	0.482161	0.936155	0.837425
fruA	1.58111	0.60903	23.4725	0.497495	0.959247	0.83783
mgtA	1.53458	0.693248	22.8017	0.486178	1.01777	0.840676
emrY	1.62601	0.636408	24.2647	0.529115	0.960963	0.845702
cydD	1.57401	0.679984	23.7734	0.522938	0.951688	0.852393
mscM	1.66223	0.790805	24.9605	0.649665	0.96612	0.853853
dsdX	1.65434	0.601242	23.8666	0.567992	0.968296	0.857641
gltP	1.64027	0.571269	23.8869	0.479332	0.998222	0.873027
malF	1.63572	0.657451	23.9558	0.489594	0.947155	0.885619
sapD	1.54227	0.531406	21.8903	0.586419	0.962429	0.886977

## Sheet: D-Cycloserine
Strain	MaxOD	Rate	AUC	Normalized MaxOD	Normalized Rate	Normalized AUC
tolQ	1.18581	0.115324	10.0144	0.127522	0.747009	0.362192
betT	0.957684	0.74527	14.1061	0.67239	0.558839	0.481589
tolR	1.14935	0.411839	15.1176	0.356736	0.728096	0.537373
potH	1.37399	1.22557	17.0659	1.06698	0.820797	0.596027
cysW	1.27555	1.27118	18.637	1.10278	0.81315	0.686497
setC	1.50492	0.468629	20.1115	0.438356	0.898372	0.697916
yfdV	1.44156	0.448996	20.3295	0.477659	0.872384	0.717943
yihN	0.785725	0.434886	20.8321	0.370394	0.457467	0.718438
yaaJ	1.45724	0.802617	20.923	0.711855	0.900626	0.729997
nirC	1.53172	1.17961	21.1894	1.00303	0.917018	0.738729
hsrA	1.45227	0.63807	20.4326	0.537153	0.862368	0.742513
cusA	1.58971	0.501364	21.8482	0.51788	0.943467	0.742663
plaP	1.54291	0.879881	21.3815	0.678189	0.942905	0.74664
ydcT	1.56929	0.232548	20.5978	0.176538	0.985676	0.750657
treB	1.46674	0.836176	21.7836	0.691216	0.888722	0.751123
idnT	0.943381	0.212862	22.5346	0.187373	0.548359	0.756704
rcnA	1.49472	0.521494	21.8673	0.426182	0.910952	0.757819
fryC	1.55532	0.458681	22.8064	0.487538	0.923286	0.761313
ptsP	1.53137	0.839903	21.9757	0.681472	0.921902	0.76194
yejB	1.46726	0.579345	20.6333	0.582734	0.942626	0.76339
ycaM	1.47279	0.676645	22.5506	0.55066	0.874534	0.764065
ydhP	1.49465	0.591166	21.4848	0.607166	0.963495	0.76688
ybhF	1.50639	0.604837	22.6359	0.615222	0.866438	0.767177
yfjD	1.53064	1.13084	22.5781	0.860616	0.926522	0.768472
ptsG	0.824012	0.537324	22.0947	0.476809	0.49571	0.774829
yiaV	1.49923	0.412504	22.873	0.336833	0.890379	0.775391
dcuC	1.46381	0.612895	22.6099	0.525785	0.88692	0.777534
ybhG	1.62504	0.458319	22.6104	0.44888	0.969635	0.782579
entS	1.4401	0.820803	23.4286	0.630119	0.85398	0.783251
setB	1.56051	0.498505	22.823	0.473388	0.93916	0.783468
gntU	1.55844	0.656435	23.7005	0.523952	0.934977	0.7842
rhtA	1.56684	0.766422	23.0003	0.62927	0.956783	0.786596
yicJ	1.54004	0.550952	23.7428	0.422196	0.927425	0.789918
rutG	1.50507	0.518342	22.6916	0.586408	0.921287	0.790261
yhdW	1.60186	0.350412	22.8227	0.249394	0.966561	0.790816
dtpA	1.62579	0.479806	22.7769	0.525879	0.993396	0.792604
ybhS	1.48151	0.624825	21.7769	0.626214	0.965837	0.793433
xanP	1.49911	0.920842	22.9502	0.695593	0.917117	0.797171
mdtJ	1.59093	0.603731	23.3996	0.576062	0.963051	0.797292
proY	1.42442	0.841112	23.3102	0.660339	0.84972	0.799852
kch	0.879956	0.405477	22.7517	0.368568	0.527772	0.800064
yadI	1.34454	0.742471	21.6845	0.70648	0.878901	0.800998
dauA	1.54277	0.621384	23.9823	0.524235	0.916059	0.801255
ycjP	0.83046	0.639167	23.6119	0.515751	0.494377	0.801341
ygdQ	1.47337	0.573222	22.3734	0.543007	0.91895	0.802107
ycaD	1.58562	0.546754	23.1242	0.537332	0.965891	0.802536
mtr	1.58847	0.658251	24.2212	0.588422	0.933435	0.803357
ybiR	1.55295	0.702657	24.0026	0.599332	0.931713	0.804
yebQ	1.45027	0.522961	19.9741	0.789024	0.924304	0.804077
ydiM	1.58304	0.768383	23.3726	0.660046	0.969457	0.804199
mdtK	1.59336	0.509217	23.092	0.591107	0.972825	0.804932
yihO	1.39149	0.816367	22.5723	0.669284	0.811785	0.804993
ydiN	1.51654	0.80837	22.7298	0.66079	0.955126	0.805033
potB	1.51934	0.541635	22.2052	0.468371	0.924665	0.80583
atpB	1.49254	0.724521	23.323	0.580835	0.91011	0.807958
yhdZ	1.56501	0.550388	24.319	0.480206	0.913093	0.808035
gltS	1.50395	0.651783	22.9983	0.489345	0.912045	0.810908
yggT	1.42166	0.753206	22.1804	0.634181	0.898763	0.812747
yifK	1.67825	0.55525	23.9655	0.465878	0.976258	0.81323
yddG	1.47018	0.984048	23.744	0.991338	0.88816	0.813415
wzxE	0.805152	0.80458	23.038	0.679634	0.485544	0.814043
yphF	1.59193	0.636395	23.8331	0.562887	0.966314	0.814894
argO	1.60291	0.544973	22.8681	0.450732	0.972511	0.816433
ybhN	1.5524	0.623426	24.1479	0.55542	0.959013	0.819253
lsrC	1.56509	0.777839	23.155	0.704593	0.965137	0.819394
uup	0.746347	1.35314	22.1436	1.28558	0.463949	0.82061
uraA	1.50033	0.662143	23.5944	0.664683	0.928893	0.821069
yghD	1.51269	0.41007	23.1101	0.324	0.912155	0.821168
dtpD	1.6636	0.633812	24.4033	0.503623	1.0016	0.821743
ynjC	1.54304	0.588752	23.4669	0.450675	0.935687	0.821826
dgoT	1.60077	0.579862	24.7124	0.469369	0.947646	0.823015
yehW	1.57604	0.605297	23.2675	0.629214	0.974651	0.823888
ydiK	1.51512	0.641392	23.8816	0.544192	0.920837	0.82392
ybaL	1.38275	0.678369	20.7191	0.694605	0.955933	0.824671
yphD	1.50698	0.636225	22.8186	0.555859	0.949106	0.825055
ygbN	1.54903	0.591531	23.3645	0.534634	0.959233	0.82663
thiP	1.56792	0.63164	23.9137	0.532779	0.961507	0.827123
phoR	1.57186	0.713439	24.6596	0.666219	0.92013	0.827248
cysP	1.47039	0.858029	23.8138	0.734205	0.886836	0.827257
ascF	1.487	0.703178	22.2816	0.582022	0.914662	0.827555
zntA	1.62755	0.599944	23.9093	0.523205	0.948054	0.829245
ydhJ	1.59038	1.05019	23.9448	0.967097	0.975451	0.829729
ynfM	1.59319	0.87729	24.2208	0.768996	0.97776	0.830774
macB	1.53078	0.556433	23.242	0.529459	0.964398	0.831109
yqcE	1.6045	0.671913	24.0804	0.60386	0.980653	0.831131
artI	0.902447	0.865198	23.978	0.673575	0.527191	0.831727
nikC	1.5152	0.866289	24.22	0.69324	0.92255	0.833023
cmtA	1.51078	0.610849	23.5574	0.530118	0.928153	0.833146
gudP	1.51771	0.732087	23.0374	0.552948	0.932525	0.834758
yheS	1.49246	0.706139	23.3545	0.537386	0.922548	0.83495
corC	1.48999	0.678784	24.3501	0.455673	0.886395	0.837652
agaV	1.59506	0.622873	24.292	0.52029	0.964896	0.838187
yehY	1.58408	0.879232	24.5055	0.739927	0.962673	0.839861
yfeH	1.50476	0.661673	25.0805	0.493825	0.910464	0.840114
yfcJ	1.57913	0.602719	23.6912	0.611225	0.98559	0.842065
ytfF	1.536	0.668633	23.5842	0.559005	0.942474	0.842524
feoB	1.51964	0.740351	23.18	0.548233	0.93239	0.843539
cycA	1.65369	1.04054	25.1272	0.804636	0.969142	0.843878
yhhJ	1.53913	0.754319	24.766	0.551006	0.935239	0.846006
leuE	1.59527	1.02095	24.6661	0.90587	0.973808	0.846015
ynfA	1.44656	0.485967	20.7833	0.686616	0.974114	0.84612
tatC	1.56808	0.952727	24.4842	0.814151	0.928134	0.846851
ybaE	1.43171	0.766959	24.0291	0.606427	0.864731	0.847065
yejE	1.62774	0.776856	25.2543	0.698003	0.984432	0.84902
nupX	1.6264	0.717846	24.6229	0.664139	0.988729	0.849471
yccA	1.49846	0.65506	22.4619	0.563981	0.958914	0.850488
glnP	0.83042	0.649204	25.0152	0.612253	0.501651	0.85383
mdlB	1.63912	0.699673	25.7269	0.506891	0.958673	0.855785
murP	1.59981	0.736785	24.4417	0.646476	0.974489	0.856067
yfbS	1.60342	0.785514	24.1884	0.673543	0.979319	0.856913
tqsA	1.63741	0.798906	25.2801	0.724654	0.992385	0.857129
yeaV	1.57356	0.591021	24.7857	0.500546	0.946455	0.85896
zupT	1.6448	0.867375	25.3895	0.67158	0.983639	0.858992
proP	1.67756	0.725041	26.5931	0.592678	0.96654	0.85905
ydjN	0.869482	0.666723	25.1534	0.574609	0.507091	0.859072
ybjJ	1.63703	1.03829	25.0075	0.867957	0.990555	0.859099
yjeM	1.53093	0.654163	24.4288	0.530555	0.946484	0.859627
cvrA	1.66351	0.964935	26.5149	0.76676	0.952395	0.859845
gsiC	0.808263	0.713636	23.7168	0.672126	0.502792	0.860289
ghxQ	1.51434	0.598967	23.7132	0.503295	0.922476	0.860313
lldP	1.59038	0.631589	24.8159	0.513521	0.937235	0.860468
mgtA	1.43879	1.18141	23.3454	0.828525	0.954245	0.860724
ygcS	1.59552	0.602932	25.5715	0.5054	0.929177	0.860769
zitB	1.61172	0.824542	24.6816	0.707782	0.982374	0.862506
zntB	1.43876	0.729331	24.7874	0.546378	0.887577	0.863158
yidE	1.61752	0.725844	26.2846	0.596051	0.934357	0.863743
artQ	0.850288	0.575931	25.2519	0.526505	0.514779	0.865363
ydjX	1.49831	0.588166	24.4771	0.479887	0.90321	0.865387
yfdC	1.57826	0.613886	25.7663	0.476408	0.940744	0.865868
aqpZ	1.63738	0.49715	24.3653	0.445991	0.960568	0.866412
nimT	1.60532	0.875239	24.7332	0.671068	0.94544	0.867495
ydeE	1.58354	0.739578	24.5917	0.618439	0.967842	0.867747
focA	0.80599	0.870389	24.4083	0.734827	0.488898	0.868174
ygaY	1.51246	0.66042	24.9169	0.493364	0.894048	0.86893
ydcZ	1.56158	0.620608	25.3846	0.5392	0.938433	0.869312
yoaE	1.61166	0.848822	24.6814	0.735544	0.989645	0.86965
araH	1.59001	0.619469	24.1843	0.56852	0.973155	0.869843
kefB	1.51822	0.807871	23.6085	0.638937	0.945086	0.870223
ydcV	0.82514	0.743022	24.7671	0.577563	0.50081	0.870446
mltF	1.62353	0.903574	25.197	0.722092	0.983136	0.871656
xylH	1.53106	0.633032	23.5222	0.526295	0.947263	0.872042
ydjK	1.63895	0.575862	25.1742	0.587245	0.982085	0.872995
ybbY	1.63957	0.638053	24.8654	0.569451	1.00334	0.873103
frlA	1.57984	0.706565	24.9098	0.559153	0.966031	0.873137
yedA	1.64534	0.667355	24.5852	0.597701	0.997783	0.873267
mdtD	1.62198	0.787921	25.0328	0.700598	0.999018	0.873308
oppB	0.808181	0.480946	23.4805	0.465897	0.49774	0.874065
ydcO	1.48697	0.614812	23.5229	0.53086	0.930591	0.874329
ptsN	1.46174	0.765573	23.1799	0.777296	0.928652	0.876057
yadS	1.62427	0.605847	24.8624	0.557564	0.988102	0.876175
fsr	1.63152	0.795186	25.8744	0.665211	0.946708	0.876224
ygaZ	1.37462	0.868779	22.0634	0.841803	0.998535	0.876326
panF	1.63348	0.738228	26.078	0.574246	0.956733	0.876926
yibH	1.5287	0.867417	24.1017	0.645507	0.910445	0.87791
rhmT	1.57566	0.850874	24.7419	0.699161	0.954412	0.877966
dcuD	1.51528	0.634299	23.7792	0.562986	0.944411	0.878168
yhjX	1.55762	0.630772	25.5858	0.475626	0.917781	0.878359
yjcE	1.00999	0.446185	25.879	0.397914	0.572143	0.878602
sstT	1.66308	0.567917	24.7997	0.482499	1.00447	0.879337
ybhR	1.54295	0.559261	23.8259	0.474802	0.915542	0.87956
sgcB	1.60034	0.527896	25.3601	0.409237	0.97336	0.879564
yajR	1.51354	0.728119	23.5362	0.640121	0.951683	0.879564
ghxP	1.68198	0.555113	24.654	0.456841	1.00066	0.880477
acrD	1.62924	0.592627	25.7151	0.528986	0.994041	0.880608
ybbW	1.56939	0.652255	24.2363	0.569036	0.969766	0.880687
dtpB	1.65542	0.881557	25.6041	0.740836	0.994643	0.881416
mdtL	1.70288	0.499907	24.4901	0.467628	1.01645	0.882505
ydcU	1.6476	0.763106	26.0735	0.601173	0.97619	0.882575
pstC	0.848648	0.964263	25.5325	0.903268	0.50371	0.882726
artJ	1.56808	0.574763	23.6716	0.510865	1.06236	0.882938
garP	1.55597	0.712383	25.9796	0.662745	0.901615	0.883161
lplT	1.59455	0.575696	24.8342	0.613445	0.986773	0.883918
narU	1.69212	0.795653	26.5239	0.613045	0.988024	0.884745
mscS	1.6362	0.635535	25.4013	0.518822	0.993055	0.885912
dppB	1.56894	0.776311	25.7774	0.63643	0.958204	0.885923
nepI	1.63366	0.564084	26.2162	0.465062	0.95932	0.886042
glpT	1.66818	0.497409	25.2515	0.439135	0.961387	0.88629
yahN	1.65108	0.734079	26.4103	0.535132	0.985869	0.886689
yhbE	1.60537	0.675647	24.4913	0.556327	0.991105	0.886804
yhjE	1.61936	0.739033	24.6783	0.648698	1.00507	0.886894
atoS	1.64997	0.552214	26.3813	0.540437	0.944116	0.887514
rhtC	1.53882	0.831669	25.2884	0.595796	0.932529	0.88753
ettA	0.918799	0.601824	26.0264	0.434869	0.538751	0.887709
yojI	1.62497	0.714207	26.4732	0.57612	0.98177	0.88776
znuB	0.873981	0.741343	25.838	0.663392	0.520249	0.888091
potE	0.844539	0.497326	24.7393	0.422119	0.525344	0.888654
glpF	0.82329	1.18656	25.4131	0.987925	0.501377	0.888701
ttdT	1.60628	0.833938	25.2902	0.658515	0.990031	0.888911
focB	1.59551	0.897998	25.5329	0.764133	0.969379	0.889591
nanT	1.686	0.70161	27.3844	0.575474	0.960825	0.890048
ykgG	1.58751	0.632938	24.2907	0.497415	0.977039	0.89012
yjhF	1.50782	0.60389	24.9714	0.542384	0.920375	0.890416
sapD	1.4943	0.637485	21.9896	0.703479	0.932493	0.891002
ybbP	1.65556	0.681499	26.6069	0.589484	0.966327	0.891119
mlaC	1.65254	0.952819	26.1046	0.773701	0.987144	0.891451
ddpF	1.58389	0.661758	27.3398	0.531418	0.919355	0.891646
ydjE	0.814504	0.615412	22.1672	0.620843	0.522821	0.891741
ugpA	1.65905	0.600196	26.4717	0.496378	0.998941	0.892833
yddA	1.6174	1.01147	25.9346	0.787715	0.949242	0.892861
fryA	1.54528	0.59262	24.3217	0.455241	0.971988	0.893276
livK	1.55165	0.839614	24.9261	0.642664	0.95355	0.894875
guaB	1.66166	0.467095	25.3355	0.510021	1.01026	0.895501
sgcA	1.55488	0.523176	24.4929	0.386525	0.973884	0.895724
ydhC	1.64627	0.597625	26.3492	0.578698	1.00391	0.897651
kgtP	1.63442	0.603396	25.8949	0.487267	0.948949	0.898463
mhpT	1.64494	1.05504	27.1735	0.725394	0.951725	0.898545
gadC	0.862471	0.690408	26.5686	0.630952	0.512095	0.898561
yfcC	1.62865	0.531618	26.0203	0.474365	0.990353	0.898776
tsgA	1.70006	0.578927	26.0873	0.456478	1.00112	0.898777
modF	1.56743	0.81666	24.6429	0.688617	0.96607	0.898921
ygaH	1.63918	0.813154	28.0069	0.691343	0.955443	0.899192
btuC	0.849345	0.625231	25.6259	0.625421	0.512387	0.899534
ybiT	0.907291	0.537968	26.2694	0.45496	0.532456	0.89956
mtlA	1.68449	0.603463	27.5889	0.47304	0.985409	0.899717
mngA	1.66777	0.582982	26.7042	0.535004	0.970866	0.900213
glvC	1.69553	0.604239	25.9583	0.514694	0.987045	0.900245
yeeO	1.6244	0.648697	26.7858	0.542689	0.966706	0.900282
ybhI	1.62032	0.674195	26.4524	0.627858	0.97611	0.900404
putP	0.872558	0.600612	26.4469	0.584157	0.518375	0.900427
uhpC	1.6281	0.529097	26.574	0.455622	0.963059	0.900587
tnaB	1.63621	1.14561	27.7046	0.854082	0.94571	0.900912
yiaM	1.71113	0.665533	26.8954	0.550495	1.02333	0.901047
yqeG	1.61485	0.685815	25.9148	0.564607	0.98008	0.902507
chbC	0.825416	0.609238	24.7196	0.508774	0.519519	0.90295
yhiD	1.57869	0.641691	25.6443	0.466435	0.951186	0.903335
crr	1.59272	1.26639	25.694	0.996932	0.954485	0.903536
ddpB	0.834527	0.604084	25.2995	0.619411	0.505562	0.903777
livH	1.60245	0.691294	25.5646	0.578932	0.974625	0.904232
psuT	1.64894	0.758383	25.9061	0.696697	1.00341	0.904386
ypjA	1.57131	0.57458	25.0786	0.495717	0.950873	0.904697
ygjI	1.62532	0.906677	25.6122	0.699845	0.977239	0.904741
arsB	1.65223	0.67013	26.9224	0.554152	0.96179	0.905001
shiA	0.864144	1.06396	27.4234	0.750667	0.512925	0.905356
emrD	1.62406	0.717274	26.7836	0.525657	0.974033	0.905685
fetA	0.846964	0.55302	25.1956	0.507806	0.515597	0.905761
ccmC	0.812892	0.808681	23.951	0.779969	0.519044	0.906126
ybjL	1.63678	1.1129	26.3722	1.00339	0.988804	0.90624
hcaT	1.68246	0.682656	26.873	0.546483	0.97563	0.907166
gabP	1.6495	0.639752	26.7082	0.540595	0.979177	0.90736
mdtG	0.843461	0.94757	26.2402	0.907195	0.5094	0.907468
yjeH	1.70215	0.582751	25.8458	0.484928	1.01353	0.907887
sgcC	1.55538	0.582317	25.8493	0.421351	0.943204	0.907975
barA	1.60125	0.67707	26.0329	0.682978	0.964019	0.908367
gltK	0.840413	0.497636	24.5561	0.415356	0.521729	0.908444
eamB	1.65743	0.820038	27.275	0.667889	0.985893	0.909133
fryB	1.5822	0.601934	26.1588	0.461083	0.954389	0.909283
ybaT	0.840573	0.633679	25.2274	0.565721	0.517662	0.909373
lptB	1.51311	0.762617	24.3418	0.638406	0.938662	0.91118
puuP	1.5901	1.01462	25.7847	0.840378	0.963362	0.911295
yjjP	1.6033	0.778849	26.11	0.561493	0.941584	0.911355
mdtH	1.60469	0.9583	25.2726	1.0696	0.967907	0.911494
yneE	1.51561	0.87093	24.5508	0.789562	0.969254	0.912156
frvA	1.55533	0.667046	27.1504	0.480609	0.9121	0.912278
rhaT	1.66278	0.917736	27.6381	0.736538	0.962051	0.912846
agaC	1.60617	0.741594	26.0095	0.588627	0.995261	0.913014
frwC	0.830249	1.33854	25.9104	1.03957	0.511482	0.913837
yphE	1.68129	0.570246	26.0074	0.52195	0.988562	0.913955
mlaE	1.6297	1.0443	24.7977	0.803833	0.978753	0.914103
arnF	1.52275	0.613136	25.0108	0.479522	0.934959	0.914175
yicG	1.6461	0.819607	27.2588	0.647173	0.967497	0.914221
pheP	1.66852	0.674687	27.6063	0.541258	0.981892	0.914445
eamA	1.58748	0.960913	25.2969	0.731548	0.936359	0.91463
yddB	1.5007	0.586919	24.9536	0.414407	0.943018	0.915848
rhtB	1.56474	0.746127	26.4144	0.530391	0.938612	0.91585
nupG	1.59013	0.774767	25.3197	0.634899	0.970954	0.915925
ycjV	1.51993	0.637926	23.8787	0.547775	0.95505	0.916161
sapA	0.820332	0.884055	25.6177	0.734229	0.516168	0.916452
ynjD	1.59437	0.570883	25.3016	0.499405	0.968103	0.916601
lysP	0.849978	1.41701	26.7683	1.23032	0.505192	0.917402
fucP	1.65052	0.911847	28.0579	0.815753	0.965691	0.917792
yhhT	1.62429	0.900375	27.025	0.620296	0.979272	0.917911
frwD	1.50131	0.728854	25.9372	0.527629	0.935458	0.918501
yhdP	1.63912	0.701232	27.5433	0.582225	0.954464	0.918606
bglF	0.946845	0.750516	28.1384	0.583656	0.533269	0.91929
rarD	1.54768	0.902359	25.5883	0.630718	0.939247	0.919349
sotB	0.837093	0.734512	25.4969	0.583739	0.514666	0.91962
ddpD	1.56294	0.604767	25.3896	0.459635	0.952298	0.919802
glvB	0.895613	0.607325	26.3394	0.57945	0.524499	0.920353
ycjO	0.838052	0.673838	26.0827	0.619819	0.519931	0.920569
galP	1.74615	0.677085	27.8136	0.549381	0.993523	0.920725
ssuC	1.46789	0.672085	24.0391	0.573884	1.00753	0.920991
ydhK	1.67994	0.705721	26.6037	0.627384	1.00633	0.921544
sdaC	1.67537	0.556338	26.4223	0.557692	0.991735	0.922086
malX	0.836634	0.748778	25.564	0.589705	0.525628	0.923209
ygiS	0.859308	0.765944	26.6782	0.581484	0.526729	0.923307
arnE	1.62263	0.651429	25.2252	0.723218	0.995231	0.92338
mdtB	1.65637	0.715555	27.6725	0.56488	0.983508	0.923705
xapB	0.844535	0.558228	24.8095	0.484442	0.527143	0.923861
mglC	0.855905	0.7405	26.0338	0.692828	0.525397	0.924147
nhaB	0.854727	0.936113	25.7609	0.844615	0.528342	0.924602
kdgT	1.58272	0.768894	26.8129	0.626915	0.97443	0.924688
ansP	1.67994	0.668174	27.7023	0.631805	0.998685	0.924757
xanQ	1.60335	0.635713	25.086	0.612846	0.979929	0.924771
mdtI	1.69131	0.582648	25.3698	0.606347	0.979261	0.924799
lacY	1.7364	0.691129	28.6025	0.567739	0.98494	0.925484
sufB	1.57114	1.0471	26.1482	0.754969	0.975801	0.926322
yghE	1.50756	0.530656	25.2925	0.417703	0.908556	0.927854
amtB	0.862835	0.919413	25.8695	0.819142	0.531381	0.927895
melB	1.71373	0.636047	27.4834	0.545225	1.00608	0.929112
proW	1.55752	0.580487	23.7565	0.719111	0.963029	0.929225
srlA	1.54807	0.759421	25.4249	0.646793	0.936314	0.929335
argT	1.46248	0.828157	25.5497	0.78965	0.997765	0.92956
sapF	1.56129	0.831915	26.4023	0.69571	0.968055	0.930052
lsrA	0.884278	0.5983	26.7551	0.507214	0.518527	0.9301
pitA	1.56628	1.1213	25.1357	0.872634	0.96589	0.930177
metI	1.65202	0.580914	25.4477	0.492962	0.978002	0.930538
mepM	1.67726	0.700579	27.7467	0.558978	0.98123	0.930748
copA	0.848767	0.594143	25.464	0.515543	0.513397	0.930753
araE	0.897914	0.789812	27.2156	0.674573	0.537789	0.930794
tdcC	1.65958	0.81562	27.0726	0.674461	0.979601	0.93147
dctA	1.62604	0.821556	26.5253	0.717161	0.987144	0.931597
hisM	1.64658	0.582852	26.4744	0.513708	0.982131	0.93169
yadH	1.61363	0.984802	26.9127	0.790299	0.961627	0.93207
gltP	1.64389	0.69488	25.5078	0.58305	1.00042	0.93227
rbsC	0.901618	0.670009	28.5137	0.547439	0.527683	0.932284
aaeA	1.70975	0.793699	27.4499	0.65062	1.01798	0.932376
gntT	1.64885	0.681173	26.5796	0.57199	0.993242	0.932449
yjhB	1.57917	0.595221	25.8451	0.477224	0.979072	0.932674
yccS	1.54394	0.826843	25.4781	0.648493	0.95461	0.932928
cadB	1.65556	0.709833	26.0642	0.615574	1.02084	0.933025
uidB	0.856045	0.804894	26.721	0.637037	0.517381	0.933786
dtpC	0.907898	0.990845	28.1295	0.703341	0.529935	0.934135
alsC	1.60945	0.68791	26.9194	0.536987	0.971179	0.934289
yegT	0.894655	0.684878	26.8523	0.628342	0.525928	0.934546
ybiO	1.46688	0.814033	24.0723	0.888392	0.968164	0.935387
yrbG	1.68991	0.773588	26.7841	0.612976	1.00539	0.936098
ytfL	0.895663	0.681136	26.4832	0.550884	0.526805	0.936611
cmtB	1.65463	0.580782	25.54	0.490376	1.0096	0.936626
yihP	1.67049	0.745097	27.8045	0.637959	0.986598	0.936757
corA	0.885389	0.592326	25.8123	0.559562	0.518935	0.937591
exuT	1.67204	0.899714	27.3442	0.727309	0.99862	0.938415
ynjB	1.59722	0.763414	25.8899	0.58101	0.973235	0.938627
mdtF	1.65284	0.809847	25.6481	0.702548	1.01728	0.938677
mdtO	1.73652	1.02794	29.0277	0.816889	0.972358	0.939272
uacT	1.69034	0.728902	28.475	0.585469	1.00068	0.939369
dlsT	1.62015	0.843254	26.9335	0.589493	0.986389	0.939551
uhpT	1.61981	0.941341	26.6454	0.709811	0.973022	0.940666
wt	1.73017	1.05142	29.0758	0.734092	0.975306	0.941478
yicL	1.68557	0.672876	28.0481	0.519616	0.98386	0.943829
yhjV	1.59335	0.729	26.1872	0.562784	0.958596	0.944066
yiaN	1.58799	1.00835	26.0039	0.792327	0.972761	0.944071
phnD	1.58788	0.708632	27.1229	0.556042	0.968822	0.945347
ydgI	1.2457	0.856712	27.7931	0.639303	0.744817	0.945869
kdpD	1.59575	0.591977	26.6646	0.560518	0.949639	0.946215
hofC	0.907202	0.809168	27.8672	0.632343	0.535798	0.946697
gdx	1.54132	0.961597	25.7927	0.790266	0.949283	0.946899
yraQ	1.71813	0.508792	26.5416	0.471024	1.02462	0.947074
soxR	1.60395	0.61856	26.4339	0.49486	0.977796	0.947101
modB	0.854103	0.858019	26.6748	0.669714	0.528916	0.948363
narK	1.65309	0.633717	26.8708	0.579852	0.987337	0.948803
codB	0.872353	0.682014	26.9358	0.555555	0.517151	0.949961
ycfT	1.61839	0.56832	26.3135	0.492574	0.970179	0.95054
kdpA	0.847891	1.01099	26.579	0.829353	0.512791	0.950711
dcuA	1.62403	0.780095	27.4868	0.641789	0.998485	0.951537
dhaM	1.63093	1.0577	28.4101	0.838748	0.973064	0.951756
rcnB	1.5733	1.06306	26.6939	0.78225	0.973122	0.952261
mscK	0.852402	0.586961	25.94	0.510654	0.512166	0.952682
exbB	1.77092	0.730029	29.5756	0.611773	1.01027	0.952818
yjiJ	1.65262	0.594934	27.713	0.470092	0.963457	0.953036
yidK	0.922028	0.740392	28.5066	0.538577	0.539913	0.953195
yijE	1.62004	0.647301	27.3651	0.534726	0.984598	0.953639
ampG	1.63468	1.02421	27.1908	0.93098	0.974884	0.953852
gntP	1.75694	0.588043	27.5222	0.461947	1.06834	0.954017
livJ	1.65502	0.64649	27.266	0.615715	0.96688	0.954082
caiT	0.867192	1.34024	27.3686	1.05198	0.523912	0.954087
acrF	1.70708	0.627421	27.9088	0.619845	1.00942	0.954535
adiC	0.921905	0.850868	27.8422	0.721293	0.529851	0.955022
yhfK	1.5715	0.580327	25.7669	0.49723	0.95648	0.956031
emrB	1.67925	0.689998	27.1238	0.620801	0.98686	0.956296
clcB	1.57491	0.924756	26.8222	0.715804	0.952162	0.956695
perM	1.64135	0.611774	25.4493	0.508308	1.03063	0.956879
xylE	0.909311	0.724148	27.8012	0.604892	0.537487	0.960243
aroP	0.881987	0.992103	26.8395	0.85024	0.53413	0.960956
adeP	0.890442	0.866924	27.8498	0.714257	0.516893	0.961596
mdfA	0.852664	0.581871	25.4647	0.46978	0.542117	0.962133
yegH	1.56866	0.941304	26.9797	0.661795	0.972381	0.96283
yaaU	0.880256	0.542611	26.4619	0.460648	0.547007	0.963244
dsdX	1.70534	0.532232	26.8304	0.502798	0.998147	0.964144
fetB	1.52943	1.1775	26.3252	0.94411	0.940999	0.964407
emrY	1.66155	1.02746	27.6896	0.854237	0.981967	0.965073
tehA	1.66211	0.654013	26.9277	0.683217	0.987687	0.96516
ybbA	0.845697	0.591724	26.4667	0.541767	0.516476	0.969283
alx	1.62677	0.828116	27.8368	0.640416	0.978614	0.96931
mdlA	0.879411	0.733916	27.2782	0.624642	0.537777	0.971268
atpI	1.67597	0.806908	28.2489	0.61276	0.993211	0.971564
cydD	1.65834	0.658433	27.1104	0.506364	1.00267	0.97204
nagE	0.837132	0.581671	25.8124	0.513735	0.535277	0.972168
ydfJ	1.66802	0.940378	29.5825	0.693091	0.97747	0.972198
tyrP	0.89258	1.23097	27.9333	1.02607	0.542886	0.972822
clcA	1.60576	0.719312	26.5395	0.556204	0.987263	0.973339
cynX	0.876692	0.591618	26.6891	0.547264	0.531232	0.97334
yjbB	1.68198	0.728595	26.6973	0.65031	0.986915	0.974116
sapB	0.84122	0.58392	24.9958	0.588748	0.542314	0.974897
dcuB	1.70189	0.802442	27.9901	0.650664	1.01373	0.975045
yhdX	1.61411	1.09194	27.8421	0.795582	0.991999	0.975132
ptsI	1.68156	1.06875	28.1512	0.798817	0.954406	0.975353
torT	0.860232	0.707248	26.2649	0.594198	0.53877	0.976648
atoE	1.57495	1.18871	26.2982	0.983626	0.968986	0.977093
adeQ	1.58709	0.799579	26.7264	0.581757	0.972751	0.977395
dinF	0.87724	0.742518	27.7802	0.579926	0.523715	0.977412
kup	1.6224	0.725433	27.3443	0.548546	0.981806	0.978601
ytfT	1.6256	0.949522	27.7232	0.692093	0.997404	0.979115
trkH	1.60247	0.961788	27.1088	0.70763	0.991008	0.979987
mscM	0.915477	0.876128	28.6779	0.71976	0.532095	0.981018
setA	0.920656	0.876543	28.4777	0.737992	0.539229	0.981504
fieF	0.925692	0.640156	28.561	0.491878	0.540555	0.98173
yeeA	1.6816	0.89878	28.5466	0.735793	0.976169	0.982029
chaA	0.84771	0.595324	25.5383	0.591019	0.539816	0.982196
phnL	1.67878	0.877244	27.5941	0.768306	0.988823	0.983837
mdtN	0.924336	0.801233	28.2563	0.637822	0.545782	0.984406
frwB	1.58627	0.864409	27.5601	0.619393	0.98044	0.984991
ulaA	1.63241	0.760765	28.1109	0.547627	0.968329	0.986296
exbD	1.71921	0.890724	28.9683	0.766714	0.985269	0.98634
yadG	1.57131	0.635206	25.851	0.499039	0.958311	0.986746
yhgE	1.57996	0.88474	27.1883	0.634193	0.950355	0.987286
yhdY	1.6195	0.912169	27.9357	0.749269	0.979395	0.987564
rbbA	1.68438	0.590435	27.8921	0.501798	1.00618	0.989233
yhhS	1.61942	1.17584	28.0097	0.90034	0.983297	0.989607
eutH	1.62045	0.652441	27.0559	0.583991	1.014	0.990266
actP	0.905528	0.775085	27.8877	0.589751	0.526205	0.990809
citT	0.888259	0.624186	27.1189	0.606673	0.543961	0.991418
araJ	0.889192	1.20514	27.7503	0.984267	0.543778	0.992347
yghF	1.61424	0.896277	28.0264	0.679206	0.97699	0.993673
sbp	0.839202	0.721275	25.8406	0.575378	0.531015	0.994887
kefC	0.882984	0.743448	27.3214	0.623443	0.532186	0.995371
fepD	0.857311	1.09391	27.6511	0.956624	0.538028	0.995687
brnQ	0.871136	0.909564	27.2583	0.759295	0.532031	0.996516
manY	1.48843	0.794375	25.3822	0.733131	1.05899	0.998845
fruA	1.68888	0.939514	28.0255	0.767455	1.02463	1.00035
yohK	1.54969	0.617573	26.0689	0.517673	0.932383	1.00162
phnK	0.915396	0.927459	28.3412	0.770468	0.542317	1.00274
yeeE	1.59842	0.723924	27.045	0.579863	0.953822	1.00277
nlpA	1.69238	0.877685	28.0956	0.771024	0.996215	1.00281
sapC	1.58706	0.693522	26.0449	0.721529	0.954137	1.00324
yggR	1.59757	0.885625	27.8563	0.707381	0.98808	1.00465
yjfF	1.59581	0.614976	26.3981	0.671735	0.969397	1.01047
acrB	0.866323	1.04703	27.7792	0.864552	0.516495	1.01358
yqgA	1.63508	0.688873	26.7101	0.569449	0.983812	1.01675
bcr	1.64162	1.1424	28.5735	0.849908	0.983386	1.01722
ycjN	1.6129	0.927149	28.4009	0.753302	0.973856	1.02614
ddpC	1.55021	1.10887	28.0745	0.783108	0.968301	1.02857
mscL	1.68591	0.695908	26.9538	0.622905	1.04089	1.03183
frvB	1.68618	0.686492	29.3759	0.517434	1.00012	1.03243
ydcS	1.58881	0.589698	25.4223	0.763593	0.948372	1.03974
malF	1.75578	0.628623	28.1806	0.468126	1.01667	1.04181
yfeO	1.61355	0.827504	27.956	0.637323	0.974892	1.04881

## Sheet: Flumequine
Strain	MaxOD	Rate	AUC	Normalized MaxOD	Normalized Rate	Normalized AUC
atpI	0	0	0	0	0	0
bcr	0.0323962	0	0	0	0.0194065	0
corC	0.0210194	0	0	0	0.0125044	0
dcuD	0.145909	0	0	0	0.0909395	0
focB	0.0679866	0	0	0	0.0413064	0
ptsP	0.0693272	0	0	0	0.0417358	0
ydcS	0.00536237	0	0	0	0.00320083	0
ynjD	0.052264	0	0	0	0.0317348	0
yjfF	0.104899	0.00102006	3.96365e-05	0.00111421	0.0637222	1.51722e-06
acrB	0.00639177	0.000196874	0.000758805	0.000162562	0.00381072	2.76865e-05
clcB	0.0212574	0.000226583	0.00590706	0.000175386	0.0128519	0.000210693
gdx	0.00964422	0.000100275	0.0151801	8.24091e-05	0.00593976	0.000557291
dctA	0.0714145	6.97052e-05	0.046348	6.08478e-05	0.0433546	0.00162779
mscL	0.0547563	0	0.0496242	0	0.0338067	0.00189968
eamA	0.0832372	1.77123	0.0696371	1.34845	0.0490967	0.00251779
fetB	0.0317431	2.95908e-06	0.0768471	2.37257e-06	0.0195303	0.00281524
ybiO	0.0353596	0.000191109	0.0825038	0.000208566	0.0233379	0.00320588
yfeH	0.0312198	0.0401558	0.100915	0.0299695	0.0188897	0.00338032
yiaV	0.0182424	0.000203361	0.114912	0.000166056	0.010834	0.0038955
srlA	0.0233292	0.00739652	0.109003	0.00629956	0.0141101	0.00398429
soxR	0.0351316	0	0.122812	0	0.0214168	0.00440024
yghD	0.0213439	0.000127298	0.132068	0.000100579	0.0128704	0.00469275
rbbA	0.0231896	0.000217424	0.180732	0.000184784	0.0138526	0.00640991
uhpT	0.0244506	0.000191039	0.182307	0.000144052	0.0146876	0.00643599
mtlA	0.0600723	0.0112825	0.218801	0.00884409	0.0351416	0.00713544
yicJ	0.0216121	0	0.215394	0	0.0130149	0.00716612
yfeO	0.0260418	0.880742	0.195022	0.678326	0.0157342	0.00731652
yohK	0.0297864	0.000211511	0.206806	0.000177296	0.0179213	0.00794588
glpT	0.0723041	0.150443	0.240309	0.132818	0.0416694	0.00843447
ddpD	0.0336556	0.000129602	0.235481	9.84997e-05	0.0205063	0.00853088
rarD	0.0593127	1.56133	0.240897	1.09131	0.0359954	0.00865507
dcuC	0.0396202	1.46938	0.25331	1.26054	0.0240058	0.0087111
yghF	0.0308193	0.000165506	0.249169	0.000125422	0.0186528	0.00883426
ycaD	0.0359901	0.0156514	0.263128	0.0153817	0.0219237	0.00913197
ddpC	0.0231422	0	0.250005	0	0.0144552	0.00915948
chaA	0.0435953	1.94343	0.244977	1.92937	0.0277612	0.00942172
uraA	0.107033	1.00134	0.282626	1.00519	0.0662668	0.0098352
ddpF	0.0436698	0	0.308947	0	0.0253478	0.0100758
ygbN	0.0635354	1.50593	0.288445	1.36108	0.0393442	0.0102051
tolR	0.0769006	0.000216976	0.296644	0.000187945	0.0487154	0.0105446
yebQ	0.0438294	0.00013534	0.269332	0.000204195	0.0279338	0.0108422
kup	0.04015	0	0.307874	0	0.0242971	0.0110182
yhdP	0.0490121	0	0.340647	0	0.0285399	0.011361
sgcB	0.0314564	0	0.330453	0	0.0191325	0.0114611
nepI	0.0525177	0	0.343443	0	0.0308394	0.0116075
cmtB	0.0403727	0	0.320981	0	0.0246342	0.0117713
sapB	0.0553788	0.161141	0.312147	0.162474	0.0357014	0.0121745
ybbP	0.105005	0.0311982	0.370016	0.0269858	0.06129	0.0123926
ytfT	0.0565775	0.0340083	0.357491	0.0247881	0.0347136	0.0126257
ycfT	0.0334077	0.000428185	0.358794	0.000371116	0.020027	0.0129609
clcA	0.049733	0	0.362257	0	0.0305771	0.0132858
ybaE	0.0617136	0	0.3774	0	0.0372739	0.013304
cadB	0.0556054	0.0157378	0.383918	0.013648	0.0342869	0.0137432
proY	0.0526906	0	0.421351	0	0.0314319	0.014458
tatC	0.0551232	0	0.418028	0	0.0326268	0.0144586
psuT	0.0497218	0	0.425426	0	0.0302566	0.0148517
proW	0.089925	0	0.384913	0	0.0556013	0.0150557
gntU	0.0348425	0	0.473261	0	0.0209035	0.0156592
yadG	0.0426072	0	0.420688	0	0.0259854	0.0160578
yejE	0.0572408	0	0.491073	0	0.0346184	0.0165093
dauA	0.062931	0.124804	0.496734	0.105292	0.0373668	0.016596
yghE	0.0453475	0.00019067	0.459305	0.000150085	0.0273294	0.0168495
ghxQ	0.0625268	0.0147206	0.466363	0.0123693	0.0380887	0.0169196
potB	0.0562845	1.57748	0.46896	1.3641	0.0342547	0.0170186
rhaT	0.0590415	0	0.516163	0	0.0341602	0.0170481
barA	0.044133	0	0.497718	0	0.02657	0.0173669
yojI	0.079294	1.85143	0.533998	1.49347	0.0479077	0.0179073
dcuA	0.115605	0	0.520011	0	0.0710762	0.0180017
yjiJ	0.0495535	0	0.527992	0	0.0288891	0.0181574
ypjA	0.0519273	0	0.505502	0	0.0314236	0.0182357
acrF	0.0697851	0	0.545089	0	0.041265	0.0186431
yadI	0.0524959	0	0.50733	0	0.0343156	0.0187401
ytfF	0.0386209	1.73458	0.525727	1.45018	0.0236974	0.0187811
panF	0.0560629	0	0.567701	0	0.0328361	0.0190901
nanT	0.0655729	1.9838	0.587487	1.62715	0.0373689	0.0190945
fryA	0.0589195	0	0.525155	0	0.0370607	0.0192876
xanQ	0.103124	0.0582479	0.523602	0.0561527	0.063027	0.0193021
ydhK	0.0867669	0	0.584859	0	0.0519756	0.0202593
yggR	0.0569826	0	0.584149	0	0.0352432	0.0210675
tolQ	0.0495328	1.52992	0.589677	1.69174	0.0312035	0.0213268
yddA	0.0307782	0	0.637389	0	0.0180635	0.0219437
modB	0.0637844	0.153377	0.618262	0.119716	0.0394994	0.0219809
ydjK	0.0727169	0	0.635169	0	0.0435733	0.0220265
sgcC	0.0704076	0	0.632833	0	0.0426962	0.0222287
cvrA	0.12594	0.0601084	0.701434	0.0477635	0.0721034	0.0227467
ydcT	0.0359803	0	0.628019	0	0.0225994	0.0228872
ygaY	0.0605298	0	0.674873	0	0.0357805	0.023535
yhdZ	0.149464	0.651314	0.711763	0.568263	0.0872034	0.0236494
yddB	0.0305768	0	0.650709	0	0.019214	0.0238824
garP	0.0926796	0	0.723795	0	0.0537037	0.0246049
copA	0.0741753	0	0.676766	0	0.0448668	0.024737
yehW	0.0820734	0.0320688	0.701233	0.033336	0.0507557	0.0248302
yjcE	0.0690612	0	0.738998	0	0.0391222	0.0250892
ampG	0.0677189	0.000196461	0.729311	0.000178578	0.0403861	0.0255842
yedA	0.0760875	0	0.727527	0	0.0461418	0.0258418
frvA	0.251653	0.370449	0.779786	0.26691	0.147578	0.0262015
yqgA	0.0731882	0	0.719038	0	0.0440366	0.027371
yccA	0.21582	0.485559	0.736259	0.418048	0.138111	0.0278774
cydD	0.0501469	0	0.780032	0	0.0303201	0.0279679
yeeA	0.0756328	0	0.813599	0	0.0439049	0.0279885
btuC	0.0762166	0	0.802356	0	0.0459795	0.0281647
yijE	0.0550637	0	0.811769	0	0.0334655	0.0282891
mglC	0.0716095	0	0.799277	0	0.0439574	0.0283727
yfdV	0.0893852	0	0.809097	0	0.054093	0.0285734
mepM	0.0894416	0	0.860378	0	0.0523251	0.0288609
ygaZ	0.0641576	0	0.730838	0	0.0466046	0.0290278
ydcU	0.109428	0.000171618	0.864965	0.000135201	0.0648353	0.0292786
adeQ	0.202422	0.920752	0.815373	0.669919	0.124068	0.0298185
frwB	0.0476945	0	0.852263	0	0.029479	0.0304596
puuP	0.0390357	1.00644	0.86233	0.833606	0.0236497	0.0304769
gadC	0.0915215	0	0.908964	0	0.0543412	0.0307415
lldP	0.135521	0.0556271	0.887003	0.0452283	0.0798648	0.0307559
ynfA	0.0568193	0	0.761601	0	0.038262	0.0310059
malX	0.142987	0.330557	0.858878	0.260333	0.0898337	0.0310172
eamB	0.126068	0.0329208	0.939323	0.0268128	0.0749892	0.0313096
ybhF	0.0834078	0	0.932694	0	0.0479742	0.0316109
oppB	0.075837	0	0.851306	0	0.0467062	0.0316901
lptB	0.133171	0.154853	0.873579	0.129631	0.0826132	0.0327005
fryC	0.0963976	0	0.980244	0	0.0572246	0.0327221
hcaT	0.100516	1.74936	0.971694	1.40041	0.0582874	0.032802
betT	0.121441	0.00696729	0.97695	0.00628596	0.0708645	0.0333534
frvB	0.085804	0	0.951617	0	0.0508929	0.0334451
hisM	0.111963	0	0.953391	0	0.0667821	0.0335518
rhtB	0.0677965	0	0.97294	0	0.0406677	0.0337342
leuE	0.137972	0.0555642	1.02647	0.0493009	0.0842229	0.0352065
ybhS	0.105095	0	1.03278	0	0.0685145	0.037629
kdgT	0.104384	0.017574	1.11041	0.0143289	0.064266	0.0382943
ybbW	0.0954007	0	1.05574	0	0.0589504	0.0383628
ybhG	0.109268	0	1.1226	0	0.0651981	0.0388549
yjhB	0.0851097	0.0390904	1.09158	0.0313411	0.0527672	0.039392
cmtA	0.101469	0.000208874	1.11387	0.000181269	0.0623381	0.0393939
yphD	0.139294	1.91801	1.10696	1.67574	0.0877281	0.0400245
phoR	0.105526	0	1.19614	0	0.0617726	0.0401266
ydfJ	0.104474	0	1.22426	0	0.0612224	0.040234
narK	0.100356	0	1.14786	0	0.0599396	0.0405307
uhpC	0.112702	0	1.19819	0	0.0666661	0.0406066
wzxE	0.100693	0	1.16409	0	0.0607224	0.041133
kgtP	0.139693	1.91874	1.22047	1.54946	0.081106	0.0423459
yhdW	0.0752842	0	1.22866	0	0.0454265	0.0425736
ytfL	0.0894483	0	1.20758	0	0.0526111	0.0427077
ybhI	0.0774142	0	1.26472	0	0.0466357	0.0430493
atoS	0.169612	0.0325701	1.34458	0.0318754	0.0970523	0.0452341
ydiK	0.126048	0	1.31389	0	0.0766077	0.0453295
glvC	0.130089	0	1.31911	0	0.0757306	0.0457471
murP	0.12269	0	1.30772	0	0.0747335	0.0458027
adiC	0.105355	0	1.34719	0	0.0605514	0.0462102
dtpA	0.12006	0	1.3329	0	0.0733596	0.0463829
ydjX	0.409776	0.565227	1.35051	0.461171	0.247021	0.0477472
potE	0.124373	0.057536	1.33119	0.0488353	0.0773663	0.0478176
mdtK	0.117985	0	1.37634	0	0.0720354	0.0479757
yhjX	0.151546	0	1.40517	0	0.0892938	0.0482395
uidB	0.1553	0.0740445	1.39898	0.0586029	0.0938611	0.0488885
rutG	0.141512	0	1.41849	0	0.0866225	0.0494007
perM	0.146587	0	1.32911	0	0.0920443	0.0499736
uup	0.0973115	0	1.36081	0	0.0604914	0.0504297
yhiD	0.104416	0	1.43679	0	0.0629125	0.0506116
lplT	0.121687	0.219626	1.4388	0.234027	0.0753048	0.0512108
yoaE	0.120005	0	1.46384	0	0.0736891	0.0515785
gsiC	0.111619	0	1.46898	0	0.069434	0.0532848
chbC	0.181354	0.0800598	1.46531	0.0668579	0.114145	0.0535243
ygcS	0.158826	0	1.6138	0	0.0924947	0.0543223
setB	0.133187	0	1.59169	0	0.0801558	0.0546394
exbB	0.171435	0	1.69606	0	0.0978001	0.0546408
ydhJ	0.271692	0.370675	1.58415	0.341346	0.166641	0.0548933
tehA	0.15712	7.85959e-07	1.53473	8.21055e-07	0.0933662	0.0550089
ddpB	0.119945	0	1.54713	0	0.0726634	0.0552683
yfbS	0.469444	0.3014	1.56134	0.258436	0.286722	0.055313
mdtH	0.126484	0	1.5358	0	0.0762915	0.055391
ybbY	0.160201	0	1.59081	0	0.0980356	0.0558581
yhdY	0.215851	1.03567	1.58232	0.850718	0.130536	0.0559371
mdlB	0.19531	1.07593	1.68275	0.779475	0.114231	0.0559753
pstC	0.128705	0.226631	1.62857	0.212295	0.0763918	0.0563038
mdtD	0.141203	0.0637096	1.6283	0.0566489	0.0869709	0.056806
mdtI	0.186333	0.129589	1.57371	0.13486	0.107887	0.057366
malF	0.124018	0	1.57703	0	0.0718122	0.0583013
yjbB	0.141921	0	1.60028	0	0.0832733	0.05839
yihN	0.195809	0	1.69327	0	0.114005	0.0583959
ydjE	0.104278	0	1.45344	0	0.0669348	0.0584688
ycaM	0.144986	0	1.72839	0	0.086092	0.0585617
artJ	0.523036	1.22605	1.57118	1.08974	0.354352	0.0586042
cysP	0.163582	0	1.6992	0	0.0986612	0.0590275
ycjP	0.165499	0	1.75912	0	0.0985225	0.0597011
modF	0.0670213	0	1.64476	0	0.0413079	0.0599973
yifK	0.167247	0	1.82739	0	0.0972894	0.0620096
aroP	0.145048	1.81837	1.74619	1.55836	0.0878409	0.0625202
yfcJ	0.184129	0.251814	1.77925	0.255368	0.114922	0.0632405
livK	0.27533	1.89222	1.78329	1.44836	0.169201	0.064022
adeP	0.194505	0	1.93788	0	0.112908	0.0669108
ydcO	0.154309	0	1.80506	0	0.096571	0.0670926
yneE	0.152294	0	1.84927	0	0.097394	0.0687074
ccmC	0.435597	0.353674	1.85372	0.341117	0.278135	0.0701307
ascF	0.168888	0	1.89226	0	0.103884	0.0702799
ydjN	0.163176	0	2.06923	0	0.0951662	0.0706713
aqpZ	0.186017	0.0899901	2.00425	0.0807298	0.109127	0.0712698
rcnA	0.211251	0	2.07395	0	0.128746	0.0718736
dsdX	0.254991	0	2.00791	0	0.149248	0.0721536
yheS	0.188257	0	2.03069	0	0.116369	0.0725995
fucP	0.210002	0	2.2309	0	0.122869	0.0729742
setA	0.167505	0.000907232	2.14269	0.00076383	0.098108	0.0738493
feoB	0.109186	1.61592	2.09832	1.19659	0.0669923	0.0763598
nupG	0.184195	0.000167505	2.11116	0.000137265	0.112472	0.0763698
mltF	0.163537	0	2.22708	0	0.0990305	0.0770428
nupX	0.182696	0	2.26275	0	0.111065	0.0780628
gabP	0.656213	0.507589	2.32752	0.428917	0.389542	0.0790732
yhhS	0.200719	0	2.24144	0	0.121875	0.0791919
fryB	0.208929	0.236359	2.28148	0.181051	0.126027	0.0793046
metI	0.191955	0.172632	2.1734	0.146495	0.113638	0.0794737
sdaC	0.694265	0.413919	2.27901	0.414927	0.410971	0.0795329
actP	0.190468	0	2.25819	0	0.110681	0.0802302
yjhF	0.116811	0	2.26661	0	0.0713013	0.0808215
tqsA	0.381019	0.0991371	2.40029	0.0899231	0.230923	0.0813825
yddG	0.167034	0	2.37745	0	0.100908	0.0814462
emrB	0.223364	0	2.32614	0	0.131266	0.0820118
yadH	0.209965	0	2.37413	0	0.125126	0.0822234
ynfM	0.196527	0.359409	2.40139	0.315043	0.120611	0.0823675
crr	0.24771	0	2.40925	0	0.148448	0.0847219
nimT	0.212323	0	2.4316	0	0.125046	0.0852861
sgcA	0.419471	0.648856	2.33544	0.479378	0.262732	0.0854089
glnP	0.197393	0	2.53404	0	0.119244	0.0864929
yihO	0.21565	0	2.43737	0	0.125809	0.0869235
ygjI	0.189912	0	2.51754	0	0.114187	0.0889311
mdtG	0.227982	0	2.63312	0	0.137688	0.0910615
atoE	0.252446	0.0278417	2.46329	0.0230383	0.155317	0.0915219
zitB	0.193551	0	2.63595	0	0.117973	0.092114
yadS	0.651502	0.858601	2.63328	0.790175	0.396331	0.0927996
yehY	0.202473	0	2.7206	0	0.123046	0.0932412
gntP	0.563339	0.342699	2.69017	0.269213	0.34255	0.0932507
ygdQ	0.221198	0	2.60624	0	0.137963	0.0934362
setC	0.228642	0	2.70587	0	0.13649	0.0939002
yahN	0.246117	0	2.81704	0	0.146958	0.0945781
phnL	0.732918	0.867317	2.67164	0.759612	0.431699	0.0952545
nhaB	0.203179	0	2.68876	0	0.125593	0.096504
eutH	0.672677	0.679348	2.65828	0.608075	0.420927	0.0972948
xylH	0.681847	1.26444	2.67718	1.05124	0.421856	0.0992515
artQ	0.238703	0.32552	2.89749	0.297584	0.144515	0.0992947
yhhT	0.243078	0	2.92972	0	0.14655	0.0995086
yhhJ	0.252339	0.168949	2.93493	0.123412	0.153332	0.100257
rhtA	0.315125	0.0324035	2.93216	0.0266049	0.19243	0.100278
yidK	0.535466	0.0814706	3.01038	0.0592635	0.313553	0.10066
ydcZ	0.234964	0	2.94697	0	0.141202	0.100921
rhtC	0.232276	0	2.8808	0	0.14076	0.101106
fieF	0.293129	0	2.98798	0	0.171172	0.102706
ydcV	0.227465	0	2.92309	0	0.138057	0.102733
mdfA	0.608862	1.02144	2.7214	0.824667	0.38711	0.102823
emrY	0.268003	0	2.98274	0	0.158389	0.103958
ygaH	0.232558	0	3.24302	0	0.135553	0.104121
kch	0.227602	0	2.96439	0	0.136509	0.104243
lacY	0.226491	0	3.23769	0	0.128473	0.104761
putP	0.216087	0	3.09657	0	0.128375	0.105428
treB	0.244266	0	3.05785	0	0.148005	0.105438
glvB	0.271119	0	3.05052	0	0.158776	0.106592
rcnB	0.24516	0	3.00601	0	0.151638	0.107235
arnE	0.46565	0.172209	2.93816	0.191187	0.285604	0.107553
xapB	0.439137	0.117759	2.91524	0.102193	0.274101	0.108558
dinF	0.246032	0.375978	3.10641	0.293649	0.146882	0.109295
agaV	0.277312	0	3.16997	0	0.167754	0.109379
mdlA	0.239414	0	3.08571	0	0.146406	0.10987
ydiM	0.229721	0	3.21638	0	0.140681	0.110669
ydiN	0.255069	0	3.16851	0	0.160644	0.112221
ssuC	0.275135	0	2.94811	0	0.188847	0.112949
rbsC	0.409845	0.0549101	3.48582	0.044865	0.239867	0.113972
mdtJ	0.28614	0	3.35025	0	0.173211	0.114153
ettA	0.206654	1.7641	3.35278	1.27471	0.121174	0.114357
yejB	0.274176	0	3.09747	0	0.176142	0.1146
zupT	0.528834	0.0790178	3.4193	0.0611809	0.316259	0.115684
dlsT	0.576378	0.289145	3.34186	0.202132	0.350913	0.116578
ynjB	0.239354	0	3.254	0	0.145846	0.117973
focA	0.23222	1.0523	3.3494	0.888408	0.14086	0.119134
araJ	0.253839	0.871671	3.36972	0.711914	0.155233	0.1205
yraQ	0.303346	0	3.46021	0	0.180903	0.123469
ybaL	0.248251	0	3.12201	0	0.171622	0.124264
dtpB	0.811798	0.178344	3.62766	0.149875	0.48776	0.124881
xanP	0.619317	0.457178	3.60589	0.345346	0.378883	0.12525
yjjP	0.864283	0.943974	3.58936	0.680535	0.507576	0.125285
cusA	0.845043	0.644341	3.721	0.665566	0.501518	0.126484
ydhP	0.259474	1.10572	3.54471	1.13564	0.167264	0.126525
nikC	0.316606	0	3.70748	0	0.19277	0.127515
kdpD	0.406551	0.0474042	3.61356	0.044885	0.24194	0.12823
yhjE	0.31168	0	3.57985	0	0.193446	0.128653
ycjO	0.453638	0.0369637	3.66347	0.0340004	0.281439	0.129299
ttdT	0.532993	0.0573354	3.72394	0.0452746	0.328511	0.130891
yphF	0.310283	0	3.82974	0	0.188344	0.130945
lysP	0.606029	1.02943	3.83379	0.893805	0.360198	0.131392
caiT	0.331056	0	3.82743	0	0.200007	0.133426
ybaT	0.251573	0.870268	3.7099	0.776938	0.15493	0.133731
mdtB	0.828346	0.888724	4.00767	0.701585	0.49185	0.133776
artI	0.296669	1.936	3.85669	1.50721	0.173308	0.133777
exbD	1.20732	0.753442	3.94109	0.648545	0.691909	0.13419
frlA	0.738173	0.342852	3.86906	0.271321	0.451375	0.135618
cycA	0.661981	0.8634	4.05176	0.667658	0.387954	0.136075
fetA	0.286198	0.80952	3.82985	0.743335	0.174226	0.13768
hsrA	0.359495	0	3.84958	0	0.21347	0.139892
yhjV	0.395947	0.00022135	3.88633	0.000170881	0.238211	0.140104
yidE	0.396416	0	4.28736	0	0.228988	0.140888
amtB	0.307981	0	3.92953	0	0.189672	0.140946
yajR	0.766084	1.44593	3.82436	1.27118	0.481699	0.142919
cynX	0.800294	1.21957	3.92082	1.12813	0.484939	0.142991
yjeH	0.394205	0	4.07628	0	0.234727	0.143188
sotB	0.300787	0.0930532	4.02137	0.0739523	0.184932	0.145042
ybhR	0.666813	0.43735	3.97156	0.371302	0.395667	0.146615
melB	0.879475	0.91044	4.35931	0.780437	0.516313	0.147372
fepD	0.146952	0.781544	4.12917	0.683459	0.0922239	0.148687
alsC	0.832477	1.17458	4.29603	0.916883	0.502334	0.149102
brnQ	0.986907	0.319134	4.08297	0.266409	0.602736	0.149267
mdtF	0.377574	0	4.08512	0	0.232387	0.149509
mscS	0.367682	0	4.30493	0	0.223157	0.150141
yegH	0.28158	0	4.25658	0	0.174545	0.151906
mscK	0.310297	0	4.14182	0	0.186442	0.152114
narU	0.703686	0.801455	4.56033	0.617516	0.410881	0.152117
yphE	0.654942	0.918145	4.33325	0.840385	0.385091	0.152279
ptsN	0.822332	1.66128	4.10877	1.68672	0.522432	0.155286
pitA	0.892537	0.309807	4.19968	0.241103	0.550407	0.155415
sapF	1.17165	0.64798	4.44612	0.54189	0.726462	0.15662
ybhN	0.357716	0	4.63689	0	0.220984	0.157313
arnF	0.331561	3.47941	4.33685	2.72118	0.203575	0.158517
yqcE	0.907373	0.855672	4.60141	0.769007	0.554575	0.158817
yicG	0.409214	2.85621	4.81507	2.25531	0.240516	0.16149
ybbA	0.289111	1.58631	4.41415	1.45239	0.176563	0.161658
dgoT	0.881694	1.41257	4.85988	1.1434	0.521955	0.161852
ghxP	0.499372	0.0288374	4.66345	0.0237323	0.297091	0.166548
tyrP	0.377512	2.77915	4.80597	2.31656	0.229611	0.167376
torT	0.28114	1.66344	4.51201	1.39755	0.17608	0.167777
ptsG	0.400989	0	4.78919	0	0.241227	0.16795
dcuB	0.910206	1.09346	4.90304	0.886641	0.542164	0.170799
gudP	0.208869	0.000192603	4.7235	0.000145473	0.128335	0.171156
kefC	0.726562	0.703125	4.75476	0.589629	0.437908	0.173225
acrD	0.771894	0.234056	5.08933	0.208921	0.470952	0.174283
ugpA	0.256761	0.0220237	5.23288	0.0182142	0.1546	0.176494
mhpT	0.451252	2.74345	5.36045	1.88627	0.261085	0.177254
macB	0.441137	0.0360501	4.97442	0.0343025	0.277917	0.17788
hofC	0.381004	1.91093	5.25723	1.49334	0.225023	0.178597
yhbE	0.416675	2.38252	5.03021	1.96176	0.257243	0.182138
dppB	0.444895	2.64348	5.33614	2.16716	0.271712	0.183393
sapD	0.7158	0.208401	4.53813	0.229975	0.446684	0.183882
tnaB	0.848732	1.04148	5.67234	0.776447	0.490555	0.184457
gltS	0.88368	0.776672	5.37799	0.583109	0.535891	0.189625
sbp	0.183939	0.0398185	4.94047	0.0317642	0.11639	0.190213
sufB	0.769524	0.319195	5.49139	0.230143	0.477933	0.194537
ycjV	0.464293	0.0642811	5.07207	0.0551969	0.291739	0.194602
corA	0.911904	0.891532	5.41305	0.842218	0.534476	0.196621
araE	0.469699	2.90932	5.78519	2.48483	0.281317	0.197858
argT	0.434697	0.0405823	5.44389	0.0386953	0.296567	0.198062
fsr	0.849662	1.09488	5.85493	0.915916	0.493025	0.198274
dhaM	0.431814	2.71679	6.01453	2.1544	0.257634	0.201491
ybiT	0.510857	2.52915	5.93852	2.1389	0.299803	0.203357
galP	0.906052	0.917369	6.17757	0.744346	0.515525	0.204498
ynjC	0.487048	0.0416891	5.84615	0.031912	0.295343	0.204736
ybjJ	0.458671	2.18135	6.0096	1.82349	0.277538	0.206452
thiP	0.903041	0.224095	6.06417	0.189021	0.553777	0.209747
livJ	0.816197	1.08497	6.17095	1.03333	0.47683	0.215932
argO	0.397517	1.53983	6.14181	1.27355	0.241179	0.219274
ygiS	1.02022	0.146433	6.34155	0.111168	0.625361	0.219475
yegT	1.34065	0.397112	6.3666	0.364331	0.788113	0.221578
yggT	0.446587	2.32398	6.11088	1.95673	0.282329	0.223919
tdcC	0.928694	0.994837	6.55	0.82266	0.548181	0.225362
tsgA	0.539819	2.55372	6.63639	2.01358	0.317885	0.228641
mngA	0.787044	0.222908	6.84613	0.204563	0.458166	0.230787
fruA	0.959436	0.196214	6.52342	0.16028	0.582083	0.232848
yaaU	0.708242	0.745148	6.48488	0.632591	0.440115	0.236057
mdtL	0.873251	1.3968	6.6305	1.3066	0.521248	0.238931
ykgG	0.755344	0.994876	6.54135	0.781856	0.464878	0.239705
yiaN	1.48612	0.763157	6.67484	0.599664	0.91036	0.24233
mdtO	0.987874	1.66196	7.54449	1.32073	0.553156	0.244123
ybiR	0.559152	2.71813	7.36466	2.31843	0.335472	0.24669
rhmT	1.4007	0.695129	6.96229	0.571186	0.848432	0.247057
pheP	0.633229	2.65885	7.63416	2.13302	0.372642	0.252878
exuT	1.63993	0.987584	7.42883	0.798341	0.979446	0.254947
kdpA	1.61284	0.874475	7.19931	0.717365	0.975421	0.257514
nlpA	1.5933	0.698067	7.21519	0.613234	0.937892	0.257529
yjeM	0.490345	2.664	7.33239	2.16062	0.303151	0.25802
yhgE	0.907361	1.43351	7.22388	1.02756	0.545784	0.26232
potH	1.48062	0.257336	7.54027	0.224035	0.884495	0.263344
ycjN	1.07423	0.760729	7.29635	0.618087	0.64861	0.263621
alx	0.929284	1.10326	7.6272	0.853196	0.559029	0.265588
plaP	1.08989	1.73105	7.68165	1.33424	0.666057	0.268243
dtpD	0.986104	1.5548	8.08576	1.23543	0.593698	0.272276
mlaE	0.564212	1.54199	7.46726	1.18692	0.33885	0.275262
znuB	0.68084	2.58323	8.02959	2.3116	0.405279	0.275989
yihP	0.746786	2.53187	8.19913	2.16781	0.441056	0.276235
entS	0.987887	0.364862	8.30086	0.280099	0.585819	0.277509
ydhC	1.29653	0.680995	8.2199	0.659428	0.790634	0.280032
yicL	1.5827	0.525929	8.59783	0.406139	0.923814	0.289321
zntB	0.732487	0.960993	8.4729	0.719928	0.451875	0.295047
ybjL	1.3446	0.106163	8.71786	0.095716	0.812296	0.299576
yfcC	0.929035	0.437504	8.73835	0.390386	0.56493	0.301834
yeeO	0.756344	0.0677333	8.99108	0.0566646	0.450111	0.302194
lsrC	0.879046	0.991738	8.57565	0.89835	0.542078	0.303469
bglF	1.07792	0.095115	9.37559	0.0739683	0.607089	0.306303
mdtN	0.929073	0.97279	8.8047	0.77439	0.548579	0.306742
dtpC	1.40596	0.16688	9.38798	0.118458	0.820654	0.31176
proP	1.65428	1.01043	9.66078	0.825963	0.953125	0.312077
frwC	0.393234	0.191012	8.96158	0.148348	0.242255	0.316067
yccS	1.27713	0.699771	8.66672	0.548831	0.789645	0.317348
ulaA	1.63811	0.897768	9.04914	0.646247	0.971711	0.317498
xylE	1.64198	0.694004	9.27682	0.579713	0.970561	0.320418
nagE	0.334569	0.136114	8.51203	0.120217	0.213929	0.320587
yaaJ	0.960512	0.227941	9.31966	0.202165	0.59363	0.325159
nirC	1.61858	0.970322	9.3882	0.825071	0.969023	0.327303
yeeE	1.56665	0.990305	8.86111	0.793235	0.934869	0.32855
frwD	0.851385	1.27339	9.33161	0.921826	0.530495	0.330455
mlaC	1.02511	1.22262	9.68303	0.992782	0.612349	0.330667
agaC	1.00454	0.918387	9.55342	0.728953	0.622462	0.335355
codB	1.68436	0.540729	9.68463	0.440467	0.998527	0.341554
gltK	1.39304	0.28547	9.26268	0.238269	0.864799	0.34267
livH	1.61006	0.960435	9.71236	0.804328	0.979258	0.343531
glpF	0.32707	1.49221	9.94632	1.2424	0.199183	0.347825
yiaM	1.45172	0.103861	10.4603	0.0859082	0.868188	0.350439
ydeE	1.48114	0.240271	10.1045	0.200916	0.905254	0.356549
guaB	0.737981	2.32142	10.1457	2.53476	0.448677	0.358607
kefB	1.5966	0.94083	9.77025	0.744092	0.993883	0.360137
yfjD	0.865318	0.0702527	10.6213	0.0534653	0.523791	0.361509
phnD	1.22574	0.559328	10.4204	0.438888	0.747866	0.363194
ansP	1.49709	0.0793185	10.9948	0.0750012	0.889988	0.367028
emrD	1.65988	0.555289	10.9253	0.406946	0.995516	0.369439
yhdX	1.60059	0.416196	10.55	0.303239	0.983687	0.369501
yibH	0.867892	1.05571	10.2254	0.785625	0.516888	0.372465
sapA	1.62134	0.956119	10.4844	0.794081	1.02018	0.375071
atpB	1.56819	0.567725	10.9783	0.455135	0.956244	0.380311
mtr	0.730555	0.129169	11.6463	0.115466	0.429296	0.38628
manY	1.47795	0.168127	9.8351	0.155165	1.05154	0.387032
yqeG	1.52371	0.969218	11.2203	0.797923	0.92477	0.390758
idnT	1.12207	0.888784	11.6487	0.782357	0.652227	0.391158
trkH	1.58028	0.715444	11.0353	0.526383	0.977282	0.39893
uacT	1.65555	0.393889	12.2837	0.31638	0.980088	0.405229
sstT	1.66789	0.174665	11.7859	0.148394	1.00738	0.417901
sapC	1.6069	0.952852	11.006	0.991331	0.966063	0.423949
arsB	1.66496	0.730539	12.6541	0.604106	0.969196	0.425369
cysW	1.59526	0.98603	11.6175	0.855405	1.01696	0.427933
yfdC	1.21345	1.17735	12.7514	0.913684	0.723294	0.428506
yrbG	1.53812	0.0628202	12.4538	0.0497775	0.915086	0.435257
araH	1.68953	1.02834	12.1893	0.943763	1.03406	0.438417
shiA	1.4743	0.540564	13.2983	0.38139	0.87509	0.439031
phnK	1.72622	0.864568	12.5834	0.718223	1.02268	0.445213
gntT	1.66287	0.897336	12.697	0.753504	1.00169	0.445428
lsrA	1.27905	1.4207	13.5373	1.20441	0.750014	0.470603
yeaV	1.61735	0.126812	14.0066	0.107399	0.972798	0.485404
ydgI	1.7362	1.16842	15.9863	0.871907	1.03809	0.544055
citT	1.7427	0.828466	14.8999	0.805222	1.06721	0.544713
gltP	1.68277	0.651089	15.0851	0.546307	1.02408	0.551334
zntA	1.70646	0.810272	16.0667	0.70663	0.994019	0.557239
ptsI	1.43048	0.19527	16.6575	0.14595	0.811903	0.577132
mscM	1.77045	0.572091	17.1187	0.469986	1.02902	0.585599
aaeA	1.76735	0.794	17.6669	0.650867	1.05228	0.600081
wt	1.73245	3.2514	18.8387	2.2701	0.976591	0.609999
yhfK	1.69787	1.09459	17.1373	0.937853	1.03339	0.635848
mgtA	1.56718	1.31424	17.3076	0.921685	1.03939	0.638115

## Sheet: Gentamycin
Strain	MaxOD	Rate	AUC	Normalized MaxOD	Normalized Rate	Normalized AUC
tatC	1.52642	0.225767	12.3022	0.192929	0.903476	0.425504
cydD	1.25276	0.739209	16.2458	0.568485	0.757448	0.582492
sapC	1.47235	0.500283	15.4272	0.520486	0.885171	0.594252
galP	1.21369	1.47849	18.0325	1.19964	0.690566	0.596936
ydgI	1.61181	0.768885	17.6887	0.573764	0.96372	0.601992
wzxE	1.59642	0.31243	17.1257	0.263911	0.962714	0.605133
pitA	1.67196	0.190008	16.4727	0.147871	1.03106	0.609592
sapF	1.58003	0.584811	18.3326	0.489063	0.979676	0.645786
mtlA	1.66039	0.629046	19.9209	0.493093	0.971312	0.649653
eamA	1.59651	0.20494	18.159	0.156022	0.941685	0.656554
frvA	1.59879	0.259923	19.9244	0.187275	0.937583	0.669476
phnD	1.58883	0.272659	19.3815	0.213947	0.969404	0.675529
yhdP	1.59281	0.391296	20.8084	0.324889	0.927495	0.693989
tnaB	1.67865	0.297102	21.7244	0.221497	0.970236	0.706446
yeeA	1.59845	0.278415	20.6106	0.227926	0.9279	0.709025
fieF	1.62805	0.387996	20.6588	0.298125	0.950697	0.710107
ycjP	1.64855	0.479602	21.3192	0.386997	0.981392	0.723532
yejE	1.5301	0.468585	21.5822	0.421023	0.925382	0.725568
rhaT	1.63317	0.748624	21.9786	0.600815	0.944918	0.725921
pstC	1.5588	0.963872	21.3668	0.902902	0.925219	0.738706
yihN	1.67456	0.231128	21.7743	0.196853	0.974968	0.750933
fsr	1.5827	0.679281	22.2761	0.568251	0.918377	0.754367
rarD	1.58982	0.529285	21.0036	0.369952	0.964823	0.754626
clcB	1.5592	0.380564	21.3871	0.294574	0.942665	0.762836
ptsI	1.65106	0.508598	22.0365	0.380141	0.937097	0.763497
yqcE	1.5664	0.366474	22.2234	0.329356	0.957367	0.767036
ybbP	1.63165	0.686096	22.977	0.59346	0.95237	0.769546
yahN	1.48388	0.439568	22.9253	0.320438	0.886033	0.769686
nimT	1.57865	0.509703	22.0026	0.390802	0.929734	0.771718
ydcT	1.51912	0.567912	21.1992	0.431129	0.954165	0.772571
soxR	1.59651	0.515746	21.5629	0.412607	0.973263	0.772578
lptB	1.60558	0.404104	20.6816	0.338286	0.996027	0.77417
proP	1.69742	0.499293	24.0675	0.408142	0.977982	0.777464
tdcC	1.53709	0.507691	22.7751	0.419825	0.907301	0.783611
lsrC	1.60598	0.24528	22.1505	0.222183	0.990356	0.783845
dlsT	1.65589	0.414443	22.4721	0.289724	1.00815	0.78392
dgoT	1.62241	0.602408	23.6051	0.487619	0.960453	0.786137
bglF	1.66984	0.425512	24.1886	0.330909	0.940467	0.790248
yjcE	1.64946	0.573294	23.2778	0.511271	0.934396	0.790289
glpT	1.67865	0.580508	22.581	0.512498	0.967419	0.792561
codB	1.5432	0.473904	22.704	0.386033	0.914846	0.800717
ulaA	1.52441	0.831118	22.8747	0.59827	0.904267	0.802582
gltS	1.56772	0.362562	22.8935	0.272204	0.950717	0.807215
nepI	1.64536	0.573232	23.8876	0.472604	0.966189	0.807341
frvB	1.58913	0.353726	23.0344	0.266616	0.942558	0.809557
uhpT	1.62856	0.76267	22.9803	0.575085	0.978283	0.811275
corC	1.58156	1.11565	23.6672	0.748943	0.940865	0.814158
ykgG	1.39613	0.692162	22.2436	0.543958	0.859254	0.815108
exbB	1.68444	0.412888	25.3018	0.346005	0.960939	0.815132
ydfJ	1.65122	0.522701	24.8319	0.385248	0.967621	0.816074
xanP	1.56104	0.539744	23.5173	0.407715	0.955003	0.816866
yfeH	1.55725	0.830837	24.4651	0.620078	0.942225	0.819502
ytfL	1.60305	0.451351	23.1952	0.365041	0.942872	0.820328
yjjP	1.54863	0.605985	23.541	0.43687	0.909479	0.821687
cysP	1.54311	0.478257	23.713	0.409239	0.930696	0.823755
yidE	1.59798	0.494374	25.0942	0.405971	0.923067	0.824626
tqsA	1.56698	0.56874	24.3822	0.51588	0.949696	0.826687
dcuC	1.56499	0.90639	24.0613	0.777566	0.948221	0.827446
fucP	1.67414	0.362588	25.3358	0.324377	0.97951	0.82875
ycjN	1.56938	0.525568	22.9841	0.42702	0.947581	0.83043
mdtO	1.73012	0.478731	25.7438	0.380439	0.968774	0.833013
narU	1.53704	0.514455	25.0171	0.396385	0.897471	0.834484
mdtD	1.5319	0.501015	24.0319	0.445489	0.943536	0.838392
adeQ	1.56652	0.563446	22.9423	0.409952	0.960143	0.839011
hofC	1.65623	0.455308	24.727	0.355811	0.978178	0.840018
eamB	1.62467	0.467986	25.2066	0.381157	0.966407	0.84019
barA	1.62912	0.457877	24.0844	0.461873	0.980802	0.840376
psuT	1.6376	0.396173	24.1	0.363949	0.99651	0.841334
proW	1.58455	0.721097	21.5696	0.8933	0.979737	0.843683
yjfF	1.57245	0.347337	22.0415	0.379394	0.95521	0.84371
mdtK	1.53575	0.567698	24.2107	0.658993	0.937652	0.843925
lacY	1.69482	0.496954	26.0881	0.408231	0.961358	0.844129
tsgA	1.63422	0.497204	24.5149	0.39204	0.96235	0.844604
ddpF	1.60511	1.19526	25.9358	0.95984	0.931671	0.845854
yadG	1.54917	0.60614	22.1809	0.476204	0.944813	0.846656
yijE	1.53531	0.968471	24.3134	0.800039	0.933099	0.847288
ptsN	1.58345	0.662979	22.4224	0.673131	1.00597	0.847432
ynfM	1.57672	0.491137	24.7365	0.43051	0.967654	0.848462
yddA	1.58252	1.13945	24.6688	0.887385	0.92877	0.849282
trkH	1.53107	0.596138	23.5156	0.438605	0.946849	0.850095
adeP	1.7018	0.326378	24.6238	0.268902	0.987879	0.850207
yhjV	1.61501	0.425641	23.6257	0.328593	0.971626	0.851721
yjiJ	1.66255	0.602687	24.7807	0.476219	0.969247	0.852198
yehY	1.59201	0.414044	24.8694	0.348443	0.967489	0.852331
ansP	1.62493	1.17044	25.5382	1.10674	0.965981	0.852516
dinF	1.56598	0.500928	24.2377	0.391237	0.934897	0.852774
panF	1.60607	0.647232	25.3827	0.503463	0.940679	0.853546
proY	1.58901	0.709046	24.8799	0.556657	0.947904	0.853713
gntU	1.59294	0.852858	25.8574	0.680732	0.955672	0.855564
atpI	1.62712	0.854474	24.8901	0.648881	0.964263	0.856043
metI	1.55117	0.605525	23.4208	0.513848	0.918294	0.856421
dcuA	1.554	0.643745	24.7724	0.529613	0.955433	0.85757
ycfT	1.5662	0.65529	23.7618	0.567953	0.938894	0.858365
alx	1.65103	0.432792	24.6588	0.334695	0.993212	0.858647
yhdZ	1.59387	0.822537	25.8539	0.717652	0.929934	0.859036
garP	1.60702	0.848299	25.3114	0.789191	0.931198	0.860446
aroP	1.62076	0.47282	24.0364	0.40521	0.981527	0.860593
fryC	1.53748	0.775938	25.7901	0.824754	0.912695	0.860914
yicJ	1.61051	1.08771	25.9062	0.833517	0.969859	0.861893
dtpB	1.67773	0.697282	25.0847	0.585976	1.00805	0.863537
rhtB	1.58333	0.867422	24.9225	0.616615	0.949761	0.864124
nlpA	1.69523	0.604926	24.2545	0.531412	0.997887	0.865709
ydcS	1.55527	0.399365	21.1769	0.517134	0.928351	0.866113
ugpA	1.58721	0.689826	25.71	0.570505	0.955689	0.867144
cycA	1.67259	0.457303	25.868	0.353628	0.980221	0.868759
exbD	1.70955	0.426914	25.5197	0.367477	0.979732	0.868921
ybhF	1.54917	0.880913	25.6508	0.896038	0.891047	0.869356
ddpC	1.55636	0.677435	23.7338	0.478421	0.97214	0.869539
yghF	1.55499	0.910004	24.537	0.689608	0.941129	0.869955
frlA	1.64724	0.431968	24.8462	0.341845	1.00725	0.870908
gdx	1.5293	0.81645	23.7481	0.670981	0.941875	0.871838
ybbY	1.58135	0.62995	24.8302	0.562219	0.967717	0.871865
mscL	1.55717	1.05125	22.7764	0.940969	0.961403	0.871911
yiaV	1.57511	0.918849	25.75	0.750294	0.935444	0.872922
zntA	1.60055	0.777839	25.2049	0.678345	0.93233	0.874179
clcA	1.52525	0.958406	23.8455	0.741083	0.937762	0.874534
mepM	1.55119	0.830875	26.0884	0.662939	0.907477	0.875121
dtpC	1.63087	0.70686	26.3729	0.501757	0.951932	0.875802
yjbB	1.64222	0.487175	24.0103	0.43483	0.963587	0.876073
betT	1.70405	0.710559	25.6715	0.641074	0.994368	0.876434
gadC	1.53507	0.760391	25.9176	0.694908	0.911453	0.876542
kup	1.58647	0.768461	24.4989	0.581082	0.960064	0.876772
ptsP	1.59719	0.889958	25.3189	0.722086	0.961527	0.877857
zntB	1.55709	1.03543	25.2189	0.775696	0.960573	0.878182
gntT	1.57266	0.833894	25.0417	0.700231	0.947347	0.878499
yidK	1.61364	0.700828	26.2778	0.509798	0.944902	0.878666
adiC	1.64696	0.680713	25.6214	0.577049	0.946566	0.878845
phoR	1.57542	0.91735	26.2352	0.856634	0.922215	0.880107
ygaH	1.62247	0.767035	27.4382	0.652133	0.945705	0.880935
yifK	1.60344	0.736403	25.9935	0.617874	0.932741	0.882049
dctA	1.62523	0.556232	25.1268	0.485552	0.986649	0.882481
ydiK	1.54457	1.04077	25.5792	0.88305	0.938734	0.882485
ydiM	1.52606	0.688468	25.6685	0.591399	0.93456	0.883196
ynfA	1.40449	0.644726	21.7819	0.910924	0.945782	0.886776
hcaT	1.61406	0.821913	26.2744	0.657962	0.935971	0.886959
yfbS	1.64133	0.428973	25.0593	0.367825	1.00248	0.887768
arsB	1.70487	0.599235	26.461	0.495527	0.992432	0.889493
ydeE	1.52892	0.915982	25.2215	0.765949	0.934456	0.889971
nanT	1.66475	0.813194	27.3895	0.666998	0.948715	0.890214
gntP	1.67287	0.587115	25.6867	0.461218	1.01722	0.890389
yebQ	1.52288	0.511654	22.1252	0.771964	0.97058	0.890671
yhiD	1.5922	0.532874	25.2872	0.387338	0.959329	0.890758
ycaD	1.52366	0.87939	25.6811	0.864236	0.928149	0.891273
ytfT	1.55941	0.609457	25.2495	0.444225	0.956788	0.891752
exuT	1.67127	0.794121	25.9862	0.64195	0.99816	0.89181
uhpC	1.60239	0.913589	26.3434	0.78672	0.947851	0.892773
modB	1.53906	0.902378	25.1154	0.704338	0.953088	0.89292
kefB	1.63547	0.578665	24.2538	0.45766	1.01808	0.894009
frwB	1.62813	0.562733	25.0162	0.403227	1.00631	0.894073
ypjA	1.55624	0.666604	24.7885	0.575111	0.941752	0.894231
sgcB	1.61398	0.943234	25.7961	0.731216	0.981658	0.894686
setC	1.63122	0.451629	25.7878	0.422454	0.973765	0.894897
shiA	1.62761	1.3182	27.1304	0.930039	0.966092	0.895686
nupX	1.5804	0.685889	25.9876	0.634572	0.960768	0.89655
puuP	1.56398	0.807311	25.3702	0.668673	0.947533	0.896645
gltP	1.62462	0.541867	24.5351	0.454662	0.988695	0.896717
mscM	1.67818	0.653229	26.2179	0.536643	0.975392	0.896867
tolR	1.58905	0.676511	25.2326	0.585997	1.00664	0.896923
dauA	1.61324	1.01931	26.8486	0.859946	0.957901	0.89702
mdtN	1.65103	0.510558	25.7575	0.40643	0.974864	0.897351
mgtA	1.49027	0.798792	24.3431	0.560196	0.988388	0.897505
murP	1.57055	0.693098	25.6342	0.608144	0.956662	0.897837
ybhI	1.57985	0.814242	26.3864	0.758279	0.951729	0.898156
cvrA	1.66705	1.1284	27.71	0.896656	0.954422	0.898602
ettA	1.61315	0.77912	26.3465	0.56298	0.945891	0.898625
rbsC	1.61032	0.709099	27.4975	0.579378	0.94246	0.899057
wt	1.78615	0.985831	27.7668	0.688299	1.00686	0.899093
rbbA	1.58254	1.04301	25.3523	0.886429	0.945347	0.899155
zupT	1.57139	0.814221	26.5902	0.630424	0.939737	0.899615
focB	1.59515	0.815486	25.8293	0.693922	0.969162	0.89992
yicL	1.5868	0.802752	26.7434	0.61991	0.926204	0.899928
ydjK	1.59393	0.938354	25.9569	0.956902	0.955113	0.900139
ygcS	1.59547	0.995873	26.7427	0.834778	0.929146	0.900191
yccA	1.4816	0.855363	23.7766	0.736435	0.94813	0.900266
sapD	1.50559	0.754205	22.2244	0.832282	0.939541	0.900517
bcr	1.5789	0.974742	25.3292	0.725176	0.945818	0.901717
pheP	1.62865	1.05795	27.2394	0.848725	0.958427	0.902293
frwD	1.58916	0.788789	25.4837	0.571018	0.990202	0.90244
yhjX	1.61603	0.744188	26.2937	0.561146	0.952195	0.90266
ynjD	1.55462	1.14599	24.9175	1.0025	0.94397	0.902687
yedA	1.58138	0.634882	25.4491	0.568617	0.958996	0.903952
acrF	1.63605	0.819056	26.4321	0.809167	0.967422	0.90403
yhhJ	1.55437	0.87628	26.4749	0.640095	0.944499	0.904382
mdtB	1.63332	0.767821	27.1045	0.606141	0.969825	0.904746
yiaN	1.56589	0.924787	24.941	0.726668	0.959223	0.905484
phnK	1.59232	0.845409	25.6143	0.702306	0.943354	0.906257
mdlB	1.61199	0.820405	27.2541	0.594358	0.942801	0.906585
feoB	1.58058	0.848876	24.9198	0.628595	0.969781	0.906854
hsrA	1.64765	0.506334	24.9657	0.426251	0.978381	0.907244
nirC	1.55986	0.993485	26.078	0.844766	0.933866	0.909162
ygaY	1.61447	0.977703	26.0716	0.73039	0.954349	0.909199
dtpA	1.57191	0.720061	26.1417	0.789203	0.960479	0.909693
yghD	1.5804	1.26421	25.6083	0.998868	0.952987	0.909937
livK	1.5806	0.838229	25.3564	0.641604	0.97134	0.910324
yfeO	1.58434	0.98278	24.291	0.756914	0.957239	0.911311
kgtP	1.64757	0.980098	26.2679	0.791468	0.956587	0.911402
thiP	1.54643	0.821138	26.3566	0.692618	0.948329	0.911619
actP	1.64807	0.555284	25.6904	0.422508	0.9577	0.912745
yggR	1.60914	0.82503	25.3145	0.658981	0.995239	0.912975
emrD	1.57561	0.950322	27.01	0.696447	0.944973	0.913342
yjhF	1.54415	0.81169	25.6152	0.729019	0.942554	0.913371
yjhB	1.5803	0.745161	25.3138	0.597439	0.979769	0.913503
malX	1.54512	0.927102	25.298	0.730146	0.970746	0.913601
entS	1.58138	0.95306	27.3289	0.731651	0.937763	0.91364
yddG	1.5142	0.901356	26.684	0.908033	0.914751	0.914135
mtr	1.59243	1.08799	27.5717	0.972572	0.935759	0.914484
xylE	1.63757	0.641954	26.4989	0.536234	0.967953	0.915263
artJ	1.41347	0.979395	24.5463	0.870512	0.957608	0.915565
ydcU	1.63767	0.831515	27.0486	0.655066	0.970308	0.91558
ycaM	1.56718	1.141	27.0242	0.928557	0.930585	0.915642
yehW	1.51709	0.91557	25.8596	0.951748	0.938199	0.915671
ybaE	1.5853	0.966488	25.9801	0.764193	0.957491	0.915841
cusA	1.58994	0.819713	26.9594	0.846714	0.943602	0.916404
ydhC	1.57237	0.937637	26.9159	0.907942	0.958844	0.916957
aaeA	1.68031	0.585939	27.022	0.480313	1.00045	0.917841
dcuB	1.67556	0.742379	26.3551	0.601961	0.998044	0.918091
yojI	1.62212	1.08565	27.4036	0.875749	0.980051	0.918961
ydhK	1.60757	0.870467	26.5506	0.773844	0.962975	0.919704
leuE	1.56293	0.99134	26.8252	0.879595	0.954065	0.92007
yegT	1.6355	0.670586	26.4375	0.615229	0.961441	0.920111
yfdV	1.56368	0.804403	26.075	0.855754	0.946291	0.920845
mdtJ	1.56981	0.849643	27.0415	0.810703	0.950263	0.921381
sapA	1.56092	0.930416	25.7702	0.772734	0.98216	0.921907
ydcV	1.56491	0.693401	26.2405	0.538991	0.949808	0.922228
yhdY	1.58006	0.806356	26.0906	0.662353	0.955543	0.922337
uidB	1.5592	0.889807	26.3951	0.704242	0.942357	0.922398
setA	1.64915	0.821963	26.7692	0.69204	0.965911	0.922618
livJ	1.62328	0.555886	26.3855	0.529424	0.948339	0.923273
yihP	1.64249	0.986769	27.4339	0.844881	0.970061	0.924271
ybhS	1.51544	0.97413	25.3808	0.976295	0.987953	0.924737
yneE	1.46681	0.798007	24.9114	0.723452	0.93804	0.925556
tolQ	1.55118	0.943012	25.6012	1.04275	0.977177	0.925915
ybhG	1.59078	0.842155	26.7605	0.824811	0.949189	0.926219
yoaE	1.63992	0.485243	26.2905	0.420485	1.007	0.926344
lldP	1.63368	0.781785	26.7312	0.63564	0.962752	0.926875
atoS	1.68188	0.728084	27.5577	0.712557	0.962378	0.92709
melB	1.66866	0.825526	27.436	0.707648	0.979619	0.927511
yphF	1.56982	0.912325	27.1407	0.806945	0.952896	0.927987
sgcC	1.60441	0.896265	26.4224	0.648517	0.972938	0.928105
ygbN	1.57919	1.04059	26.2552	0.940503	0.977909	0.9289
mdfA	1.50669	0.955539	24.5981	0.771465	0.957942	0.92939
rcnA	1.56356	0.809453	26.8232	0.661511	0.952901	0.929567
dhaM	1.65598	0.44716	27.7597	0.354596	0.98801	0.929967
uraA	1.61869	1.08193	26.7634	1.08608	1.00217	0.931349
ydjX	1.5934	0.976515	26.3525	0.796743	0.960532	0.931693
glnP	1.51225	0.977626	27.2988	0.921982	0.91354	0.931773
yeeO	1.60494	1.17022	27.7275	0.97899	0.955124	0.931934
setB	1.59499	0.939969	27.1507	0.892608	0.959908	0.93203
yjeH	1.64716	0.630726	26.5433	0.524849	0.980789	0.932389
yohK	1.58945	0.584424	24.2717	0.489886	0.95631	0.932564
ybiR	1.62792	1.00863	27.8545	0.860312	0.976694	0.933024
yicG	1.67266	0.777815	27.8284	0.614173	0.983109	0.933324
srlA	1.55898	0.982842	25.5443	0.837079	0.942912	0.933696
artQ	1.56552	1.12098	27.2661	1.02478	0.94779	0.934387
yfjD	1.5889	1.11358	27.4536	0.847483	0.961789	0.934416
frwC	1.57116	0.618354	26.4966	0.48024	0.967927	0.934512
tehA	1.54454	0.869878	26.0785	0.908722	0.917821	0.934723
narK	1.60741	0.851516	26.4754	0.779138	0.960054	0.93484
putP	1.587	1.02951	27.4601	1.0013	0.942818	0.934924
zitB	1.57846	0.712841	26.7541	0.611898	0.962103	0.934932
fetB	1.5663	0.935922	25.5302	0.750415	0.963682	0.93528
alsC	1.59126	1.1882	26.9583	0.92752	0.960198	0.935636
xylH	1.5582	0.893563	25.2402	0.742897	0.964053	0.935734
yhfK	1.56148	1.07426	25.2201	0.920439	0.950381	0.935745
yhdW	1.62361	0.842546	27.0153	0.599655	0.979684	0.936088
hisM	1.61282	0.857438	26.6038	0.75572	0.961994	0.936245
ydhJ	1.57089	1.04495	27.0231	0.962266	0.963498	0.936395
mglC	1.57799	1.02112	26.3899	0.955385	0.968647	0.936787
yghE	1.59011	0.833297	25.5397	0.655925	0.958304	0.936921
yggT	1.43714	0.716331	25.5784	0.603133	0.908548	0.937259
rhtA	1.57669	1.13029	27.4175	0.928023	0.962799	0.937664
mltF	1.61052	0.744934	27.1109	0.595315	0.975262	0.937866
yegH	1.56085	0.667796	26.291	0.469502	0.967535	0.938255
ydcO	1.51863	0.958906	25.245	0.827968	0.950404	0.938339
agaC	1.59125	0.984598	26.7382	0.781507	0.986016	0.938594
yqeG	1.61046	0.926954	26.9522	0.763129	0.977416	0.938636
caiT	1.59289	0.838546	26.9351	0.658195	0.962338	0.938972
ddpB	1.50472	0.98007	26.2948	1.00494	0.911567	0.939333
yfdC	1.6192	1.15957	27.9568	0.899888	0.965145	0.93948
potH	1.63218	0.668608	26.9177	0.582085	0.975034	0.940101
ygjI	1.62736	0.617011	26.6301	0.476258	0.978467	0.940698
yibH	1.60837	0.949268	25.8308	0.706418	0.957893	0.940896
yfcC	1.5524	1.06149	27.2429	0.947174	0.943985	0.941008
ddpD	1.62524	0.757062	25.9851	0.575382	0.990257	0.941374
treB	1.56868	1.00811	27.3146	0.833339	0.95049	0.941837
glvC	1.63198	1.09825	27.1623	0.935495	0.950047	0.942
ccmC	1.51086	0.810128	24.9007	0.781364	0.964705	0.942054
sdaC	1.71184	0.920482	27.0032	0.922722	1.01333	0.942354
ygaZ	1.39618	0.890462	23.7608	0.862812	1.0142	0.943743
fryA	1.57504	0.777543	25.6995	0.597296	0.990711	0.943877
uup	1.51372	0.989383	25.4727	0.939987	0.940969	0.943982
ycjO	1.53505	1.08072	26.7484	0.994079	0.952351	0.944064
kdgT	1.57149	0.826194	27.4147	0.673634	0.967516	0.945444
idnT	1.6598	1.03124	28.177	0.907754	0.964794	0.946173
dtpD	1.61445	1.02453	28.1212	0.814085	0.972006	0.94694
glpF	1.56488	0.968347	27.0802	0.806242	0.952997	0.946999
lplT	1.54395	0.996235	26.6127	1.06156	0.955462	0.947219
ytfF	1.64793	0.988679	26.5164	0.826576	1.01116	0.947274
ybhN	1.57362	1.08015	27.9223	0.96232	0.972127	0.947304
gabP	1.63471	1.06415	27.8927	0.899218	0.970398	0.947603
mngA	1.60099	1.01975	28.1169	0.935823	0.931993	0.947835
xanQ	1.56125	0.875982	25.7247	0.844472	0.954199	0.948316
cysW	1.52623	1.16539	25.7565	1.01101	0.97296	0.948747
fryB	1.56635	0.939308	27.2966	0.719512	0.944831	0.948836
mdtG	1.60322	0.936916	27.4585	0.896995	0.968251	0.949603
yfcJ	1.55344	0.986874	26.7296	1.0008	0.969561	0.950061
lysP	1.62586	0.853239	27.7555	0.740829	0.966344	0.951233
yheS	1.58396	0.988323	26.6428	0.752134	0.979113	0.952512
gsiC	1.54765	1.03748	26.2638	0.977135	0.962737	0.952675
sapB	1.46678	0.85918	24.4273	0.866283	0.945596	0.952722
znuB	1.61662	1.02578	27.7221	0.917922	0.962314	0.952849
acrD	1.60424	1.17514	27.832	1.04894	0.978787	0.953099
chbC	1.52625	0.991947	26.1004	0.828374	0.960629	0.953386
fruA	1.6359	0.649882	26.7213	0.530865	0.992492	0.953794
ydjN	1.68893	0.86435	27.9304	0.744932	0.985	0.953916
araH	1.58304	1.13223	26.5276	1.03911	0.968886	0.954125
rcnB	1.60405	0.872695	26.7463	0.642169	0.992146	0.954131
araJ	1.59424	0.683933	26.6906	0.558584	0.974941	0.954451
ydhP	1.53071	1.03253	26.7424	1.06047	0.986739	0.954546
yddB	1.57325	1.02921	26.0103	0.726695	0.988605	0.95463
eutH	1.55336	0.973042	26.1211	0.870956	0.972017	0.956051
uacT	1.63686	1.08292	28.9829	0.869823	0.969022	0.956126
yadS	1.58666	0.904219	27.1346	0.832158	0.965222	0.956249
focA	1.56664	0.990527	26.8849	0.836254	0.950297	0.956264
nikC	1.60254	1.21089	27.8229	0.969006	0.975724	0.956942
yeaV	1.61562	1.04158	27.6173	0.882131	0.971756	0.957089
modF	1.56303	0.896037	26.241	0.755548	0.963356	0.957215
potB	1.58	1.12353	26.3794	0.971557	0.961586	0.957312
fepD	1.58526	1.04557	26.6193	0.91435	0.99487	0.958534
mdtL	1.54598	0.941812	26.612	0.880998	0.922804	0.958967
yiaM	1.64617	0.913828	28.6584	0.755872	0.984477	0.96011
kefC	1.57978	0.687079	26.3556	0.576172	0.952151	0.960185
ampG	1.63112	1.06745	27.4065	0.970287	0.972763	0.961419
yrbG	1.65306	0.865677	27.5108	0.685946	0.983468	0.961496
ybiT	1.63398	0.89189	28.0808	0.754272	0.958923	0.96159
mdtF	1.60928	0.575074	26.2834	0.49888	0.990471	0.961931
copA	1.55426	1.08305	26.3254	0.939768	0.940131	0.962239
cadB	1.67169	0.92725	26.8838	0.80412	1.03078	0.962364
kdpA	1.58947	1.05626	26.9081	0.866488	0.961286	0.962483
dcuD	1.58772	1.03292	26.0679	0.916795	0.98956	0.962691
livH	1.60275	0.640263	27.232	0.536196	0.974811	0.963209
btuC	1.59456	0.881096	27.4415	0.881364	0.961954	0.963264
atpB	1.57589	1.09189	27.8242	0.875347	0.960939	0.963892
yeeE	1.61193	1.06325	26.0144	0.851664	0.961887	0.964557
ghxP	1.5655	1.01905	27.0113	0.838651	0.931361	0.964666
citT	1.54889	0.941724	26.4154	0.915302	0.948526	0.965701
ttdT	1.59155	0.880244	27.4805	0.695081	0.980953	0.965896
yihO	1.60229	0.990147	27.0966	0.811755	0.934762	0.966342
lsrA	1.62007	0.926129	27.8072	0.785135	0.949986	0.966674
ydiN	1.53933	1.07375	27.2946	0.877724	0.969479	0.96671
ygdQ	1.56142	1.01551	26.9745	0.961983	0.973866	0.967063
chaA	1.53029	0.863718	25.1508	0.857471	0.97448	0.967292
rhtC	1.60922	0.78741	27.5635	0.56409	0.975195	0.967379
rhmT	1.61249	0.912975	27.2851	0.75019	0.976721	0.968212
ynjB	1.59948	0.9312	26.7084	0.708707	0.974615	0.968303
ydjE	1.52146	0.918438	24.0829	0.926544	0.976608	0.968806
sotB	1.59831	0.870426	26.8731	0.691755	0.982684	0.969254
yejB	1.51912	1.04713	26.1988	1.05325	0.975942	0.969304
yaaJ	1.57043	1.08684	27.7843	0.963933	0.970583	0.969385
glvB	1.65219	0.901531	27.7521	0.860152	0.967573	0.969716
mlaC	1.65262	0.847088	28.4109	0.687846	0.987192	0.970208
rutG	1.58034	0.858915	27.8608	0.971704	0.967363	0.970282
nhaB	1.57267	1.03544	27.0381	0.934234	0.972132	0.970442
ybbW	1.55827	1.11795	26.7156	0.975312	0.962894	0.970777
cmtB	1.60258	1.06934	26.4871	0.902883	0.977846	0.971359
araE	1.61078	1.00472	28.4147	0.858128	0.964744	0.971803
ygiS	1.58742	1.15772	28.0961	0.878907	0.973038	0.972379
mscS	1.5814	0.974954	27.8821	0.795909	0.959796	0.972434
kdpD	1.60933	0.78343	27.4044	0.741796	0.957721	0.972469
brnQ	1.59738	0.828449	26.6092	0.69158	0.975569	0.972786
plaP	1.57657	1.1158	27.8657	0.860028	0.963478	0.97307
sgcA	1.58631	0.772402	26.6131	0.570654	0.993573	0.973263
macB	1.52848	1.07677	27.2191	1.02457	0.962947	0.973326
ybhR	1.6058	1.00023	26.3687	0.849177	0.952836	0.973433
ydcZ	1.60677	0.971369	28.4324	0.843949	0.965589	0.973684
mdtH	1.67404	0.755169	27.0088	0.842875	1.00974	0.974112
corA	1.60455	0.875181	26.8212	0.82677	0.940443	0.974238
argT	1.48837	0.968709	26.7869	0.923666	1.01543	0.974571
yadH	1.61391	0.989831	28.1521	0.794335	0.96179	0.974992
ybjL	1.65512	1.10234	28.3749	0.993865	0.999885	0.975061
mdlA	1.60151	0.84328	27.3854	0.717722	0.979352	0.975088
cynX	1.61117	0.732149	26.7391	0.677259	0.976291	0.975162
yhjE	1.58806	0.86315	27.1411	0.757644	0.985637	0.975399
mhpT	1.64794	1.26528	29.515	0.86995	0.953464	0.975973
aqpZ	1.62454	0.942634	27.4533	0.845633	0.953033	0.97622
potE	1.54112	0.999439	27.1996	0.848302	0.958648	0.977032
ybiO	1.47497	0.885	25.1634	0.965842	0.973502	0.977782
ybjJ	1.61736	1.20707	28.4941	1.00905	0.978652	0.978879
yadI	1.52441	0.971035	26.5082	0.923964	0.996476	0.979179
sufB	1.58997	1.08606	27.6453	0.783064	0.987491	0.979361
yaaU	1.55823	0.953537	26.9464	0.809502	0.968313	0.980877
ptsG	1.60515	0.966428	28.0034	0.857586	0.965629	0.982037
fetA	1.54569	0.942231	27.3367	0.865195	0.940954	0.982734
yphE	1.77266	0.91644	28.0035	0.838824	1.04228	0.984102
emrY	1.67529	0.97725	28.254	0.812493	0.990086	0.984742
dppB	1.58576	1.17335	28.6685	0.961932	0.968472	0.985284
yhhS	1.58933	1.00982	27.9056	0.773219	0.965029	0.985928
yhgE	1.67159	0.832576	27.1609	0.596801	1.00547	0.986289
ynjC	1.58155	1.11595	28.166	0.854231	0.959044	0.986392
yccS	1.57957	1.13812	26.9537	0.892631	0.976641	0.986959
yphD	1.61049	1.02919	27.2976	0.899183	1.01429	0.987003
ycjV	1.48201	0.991479	25.7385	0.851363	0.931222	0.987518
kch	1.6264	0.913175	28.095	0.830052	0.975466	0.987961
yhhT	1.58668	1.18689	29.0904	0.817683	0.956596	0.988061
artI	1.67248	0.943861	28.4875	0.734815	0.977031	0.988149
phnL	1.7081	0.610319	27.7337	0.534528	1.0061	0.988817
acrB	1.62033	0.919324	27.1144	0.759103	0.966025	0.989322
arnE	1.59072	0.895974	27.0294	0.994713	0.975664	0.989425
amtB	1.57301	1.07171	27.5956	0.95483	0.968749	0.989809
guaB	1.63598	0.845262	28.0414	0.922942	0.994645	0.991143
oppB	1.56019	0.857729	26.6378	0.83089	0.960882	0.991598
nagE	1.5195	1.05356	26.3358	0.930507	0.971596	0.991881
ybbA	1.52416	0.97225	27.0934	0.890167	0.930819	0.992232
ssuC	1.53924	0.985373	25.8996	0.841396	1.0565	0.992273
yqgA	1.64751	0.673949	26.0758	0.557112	0.991293	0.992606
yhdX	1.63821	1.07	28.3475	0.779595	1.00681	0.992834
tyrP	1.61745	1.06012	28.5294	0.88366	0.983768	0.993581
yhbE	1.59126	0.765631	27.4408	0.63042	0.982397	0.993603
ybaT	1.56856	0.969331	27.5704	0.865376	0.965989	0.993831
emrB	1.66927	0.838165	28.2606	0.754108	0.980997	0.996375
manY	1.45225	0.906724	25.3222	0.836818	1.03325	0.996482
sbp	1.54278	0.826789	25.9581	0.659549	0.976214	0.999413
mdtI	1.66706	0.858461	27.4435	0.893378	0.965224	1.00039
agaV	1.64547	1.08226	29.0275	0.904015	0.995388	1.00158
gltK	1.56176	1.00151	27.09	0.835921	0.969541	1.00219
cmtA	1.61647	1.16177	28.3381	1.00823	0.993083	1.00222
argO	1.59765	0.972389	28.1501	0.804237	0.969317	1.00501
yraQ	1.61176	1.01057	28.222	0.93556	0.961183	1.00704
dsdX	1.66111	1.00307	28.027	0.947598	0.972261	1.00714
ghxQ	1.5693	1.02901	27.7688	0.864644	0.955955	1.00745
perM	1.60613	1.028	26.8454	0.854137	1.00851	1.00937
arnF	1.58793	1.08577	27.6206	0.849163	0.974974	1.00957
yjeM	1.5826	1.06836	28.7063	0.866488	0.978426	1.01015
nupG	1.67008	0.926207	27.9347	0.759	1.01977	1.01052
xapB	1.55485	1.01503	27.1443	0.880865	0.970508	1.0108
malF	1.76224	0.468627	27.372	0.348979	1.02042	1.01192
crr	1.67464	1.27138	28.82	1.00086	1.00358	1.01346
mscK	1.5891	0.963866	27.6039	0.83856	0.95481	1.01379
ascF	1.59913	1.02163	27.3935	0.845605	0.983637	1.01741
torT	1.57757	1.03648	27.4665	0.870807	0.988042	1.02133
sstT	1.62345	0.98491	28.8858	0.836774	0.980533	1.02422
yajR	1.53381	1.06238	27.4098	0.933988	0.964432	1.02432
ybaL	1.50513	0.906852	25.9822	0.928557	1.04053	1.03416
gudP	1.63475	1.25646	28.6104	0.949009	1.00444	1.0367
mlaE	1.65395	1.21747	28.2463	0.937128	0.993319	1.04123
atoE	1.66893	1.11844	28.2394	0.925479	1.02681	1.04921

## Sheet: Levofloxacin
Strain	MaxOD	Rate	AUC	Normalized MaxOD	Normalized Rate	Normalized AUC
yadS	0.1055	0	0	0	0.0641793	0
ydcZ	0.045	0	0	0	0.0270427	0
mepM	0.036	0.0821123	0.0461667	0.0655158	0.0210607	0.00154863
yihO	0.017	0.0651359	0.0465833	0.0534006	0.00991768	0.0016613
ygcS	0.025	0.0856506	0.0936667	0.0717955	0.0145592	0.00315293
ydcT	0.002	0.584372	0.09575	0.443625	0.00125621	0.00348947
kgtP	0.016	1.16961	0.142083	0.944506	0.00928965	0.00492979
yjhB	0.012	0.0981486	0.150333	0.0786915	0.00743988	0.00542509
ycjN	0.0065	0.0632988	0.19525	0.0514298	0.00392465	0.00705449
yghF	0.007	0.876134	0.207083	0.663941	0.00423662	0.0073421
yfeO	0.019	0	0.196833	0	0.0114796	0.00738448
yjhF	-0.001	1.67784	0.209333	1.50695	-0.000610402	0.00746428
soxR	0.002	0	0.209917	0	0.00121923	0.0075211
nepI	0.008	1.06862	0.223167	0.881027	0.00469776	0.00754246
cydD	0.0175	0.0464362	0.22475	0.0357115	0.0105809	0.00805838
atpB	0.026	0	0.233583	0	0.0158541	0.00809184
fryA	0.0075	0.076792	0.22375	0.0589905	0.00471754	0.00821778
ydeE	0.071	1.77994	0.238667	1.4884	0.0433943	0.00842163
corC	0.007	0.0498668	0.245333	0.0334759	0.00416429	0.00843954
frvA	0	0.694314	0.252917	0.500256	0	0.00849822
eutH	0.013	0	0.235917	0	0.00813474	0.00863472
dcuC	0.0185	0	0.260167	0	0.0112091	0.0089469
yhdZ	0.022	0.0664521	0.27575	0.0579786	0.0128357	0.00916222
mdtL	0.0695	0.0779481	0.2585	0.0729149	0.0414849	0.00931508
mdtK	0.0765	0	0.26925	0	0.0467069	0.0093854
yfeH	0.035	0	0.2845	0	0.0211769	0.00952982
yhiD	0.011	0.0140688	0.281583	0.0102264	0.0066277	0.00991893
ydjX	0.017	0.0241592	0.2815	0.0197116	0.0102479	0.00995243
sgcA	0.0125	0.0173732	0.27625	0.0128354	0.00782927	0.0101027
ydcS	0.009	1.68768	0.250917	2.18536	0.00537215	0.0102622
mdtH	0.0415	0	0.28475	0	0.0250317	0.0102699
yadG	0.011	1.15681	0.269667	0.908828	0.0067087	0.0102933
sgcB	0.046	0.0976034	0.29725	0.0756644	0.0279782	0.0103095
ybaE	0.0175	0.043755	0.30425	0.0345967	0.0105697	0.0107253
fryB	0.011	0	0.308583	0	0.00663525	0.0107264
yhdP	0.055	0	0.321667	0	0.0320266	0.010728
ddpF	0.0165	0	0.332333	0	0.00957729	0.0108385
yggR	0.018	1.05718	0.301667	0.844411	0.0111328	0.0108797
ycfT	0.033	1.3608	0.306083	1.17943	0.0197826	0.0110569
ddpC	0.0185	0	0.303167	0	0.0115555	0.0111072
dauA	0.0375	1.72851	0.3345	1.45827	0.0222665	0.0111757
ypjA	0.012	0	0.314167	0	0.00726175	0.0113334
yaaJ	0.0795	0.0934249	0.333083	0.0828602	0.0491338	0.0116212
sapC	0.005	0	0.309	0	0.00300598	0.0119026
yghE	0.023	0	0.325583	0	0.0138613	0.011944
nupX	0.0855	0	0.347417	0	0.0519777	0.0119856
tqsA	0.087	0.0735229	0.3545	0.0666895	0.0527279	0.0120194
mdtF	0.0515	0	0.333083	0	0.0316969	0.0121903
yejB	0.0385	0	0.332	0	0.024734	0.0122834
sapD	0.004	0.679801	0.304417	0.750176	0.00249614	0.0123347
yoaE	0.031	0	0.352833	0	0.0190356	0.0124321
yddB	0.0075	1.6195	0.34125	1.14348	0.00471289	0.0125246
yejE	0.0835	0	0.37325	0	0.0504995	0.0125482
yeeE	0.034	0	0.339833	0	0.0202888	0.0126003
tnaB	0.025	0	0.388083	0	0.0144497	0.0126199
hcaT	0.035	0	0.375167	0	0.020296	0.0126647
ygjI	0.0825	1.95488	0.360667	1.50893	0.0496039	0.0127404
ybbY	0.0425	0	0.367167	0	0.0260081	0.0128924
frwB	0.0265	0	0.367583	0	0.0163791	0.0131373
frwD	0.0155	1.50048	0.371417	1.08622	0.00965799	0.0131528
ybbP	0.03	1.31065	0.39475	1.13368	0.0175105	0.013221
cvrA	0.0335	1.31295	0.410333	1.0433	0.0191795	0.0133066
murP	0.0535	0	0.38625	0	0.0325883	0.0135284
yhgE	0.062	0.0416909	0.37525	0.0298846	0.0372934	0.0136264
zntB	0.0215	0.0436918	0.39875	0.0327317	0.0132634	0.0138854
yjiJ	0.036	1.84118	0.404083	1.45483	0.0209876	0.0138962
entS	0.0335	0.0172951	0.415667	0.0132772	0.0198656	0.0138963
yhjV	0.043	0	0.3865	0	0.0258698	0.0139336
yfcJ	0.055	0.0330758	0.39725	0.0335425	0.0343275	0.0141196
yddG	0.075	0	0.41875	0	0.0453086	0.0143454
yhbE	0.086	0.0549076	0.40725	0.0452109	0.0530938	0.0147461
leuE	0.074	0.136006	0.43075	0.120676	0.0451721	0.0147741
rcnA	0.048	0	0.4275	0	0.0292533	0.0148152
yfbS	0.066	0	0.41825	0	0.0403108	0.0148172
rhtA	0.0565	0	0.433333	0	0.0345015	0.0148197
ghxP	0.0705	0.0467357	0.419	0.0384622	0.0419425	0.0149639
yjeH	0.062	0	0.432417	0	0.0369175	0.0151895
barA	0.152	0.823612	0.436917	0.830799	0.0915106	0.0152453
yhjX	0.091	1.73217	0.445292	1.30613	0.053619	0.0152868
arnE	0.046	0	0.425833	0	0.0282139	0.0155879
ydcU	0.09	0	0.460667	0	0.0533242	0.0155933
ttdT	0.0485	0	0.44525	0	0.029893	0.0156499
lsrC	0.054	0	0.445833	0	0.0333	0.0157768
sapF	0.0245	0	0.450667	0	0.0151909	0.0158753
proY	0.0475	0	0.471	0	0.0283355	0.0161616
dtpB	0.0835	0.915028	0.472	0.768963	0.0501701	0.0162485
yehY	0.0595	0	0.474667	0	0.0361591	0.0162679
ybhS	0.073	0.126864	0.446583	0.127146	0.0475907	0.0162711
dtpD	0.085	0	0.490167	0	0.0511755	0.0165056
ydhC	0.093	0	0.487583	0	0.056712	0.0166108
ykgG	0.03	0.0560798	0.460417	0.0440721	0.0184636	0.0168718
ydhK	0.0615	0	0.48975	0	0.03684	0.0169648
psuT	0.055	0	0.489167	0	0.0334685	0.0170769
ydhP	0.072	0	0.48075	0	0.0464131	0.0171599
ycaD	0.063	0	0.497083	0	0.038377	0.0172515
yiaV	0.0225	0	0.517	0	0.0133626	0.0175262
zntA	0.0735	0	0.509833	0	0.0428141	0.0176825
mdtD	0.0855	0	0.509083	0	0.0526617	0.0177602
ydhJ	0.0575	0	0.51725	0	0.0352674	0.0179236
mdtJ	0.0935	0	0.527	0	0.0565991	0.0179564
tsgA	0.095	0	0.522917	0	0.0559429	0.0180159
yqgA	0.0275	0.763596	0.480667	0.631217	0.0165465	0.0182971
thiP	0.078	0	0.533417	0	0.0478324	0.0184497
ygdQ	0.058	0	0.519583	0	0.036175	0.0186276
lplT	0.138	0	0.52475	0	0.0854001	0.0186773
yfdV	0.081	0	0.531833	0	0.0490185	0.0187818
yhjE	0.1095	0	0.52325	0	0.0679618	0.0188046
yibH	0.047	0	0.516667	0	0.0279917	0.0188197
zupT	0.058	0	0.556667	0	0.0346858	0.0188335
dtpA	0.0495	0	0.54475	0	0.0302457	0.0189565
yohK	0.072	0.0189627	0.497917	0.0158953	0.0433195	0.0191309
macB	0.203	0.724059	0.535667	0.688959	0.127891	0.0191548
yggT	0.0965	0	0.528583	0	0.0610065	0.0193687
kdpD	0.084	0	0.5565	0	0.0499887	0.0197479
ybhG	0.063	0	0.5805	0	0.037591	0.0200919
ydfJ	0.031	0	0.617833	0	0.0181662	0.0203044
ycjV	0.023	1.34581	0.5355	1.15562	0.0144521	0.0205457
phoR	0.0945	0	0.612667	0	0.0553181	0.020553
ygaY	0.0575	0.0441922	0.590667	0.0330137	0.0339895	0.0205984
argO	0.1065	0	0.585833	0	0.0646151	0.0209153
yiaM	0.1175	0	0.629167	0	0.0702698	0.0210783
yccA	0.0365	0	0.55725	0	0.0233576	0.0210995
mlaC	0.085	0	0.617917	0	0.0507748	0.0211013
yghD	0.0435	0	0.595833	0	0.0262307	0.0211716
setC	0.0995	0	0.611167	0	0.0593972	0.0212089
sstT	0.1185	0	0.606333	0	0.0715719	0.0214991
sgcC	0.028	0	0.614333	0	0.0169796	0.0215789
yeeA	0.0455	1.95344	0.630417	1.5992	0.0264128	0.0216869
mltF	0.089	0	0.627167	0	0.0538945	0.021696
ydiM	0.211	0.515468	0.6355	0.442791	0.129217	0.0218662
yphF	0.0865	0	0.650333	0	0.0525063	0.022236
araH	0.0905	0.017166	0.622333	0.0157542	0.0553898	0.0223836
yadI	0.1135	0	0.609333	0	0.0741928	0.022508
ydiN	0.079	0	0.63925	0	0.0497547	0.0226407
eamB	0.105	0	0.682667	0	0.0624573	0.0227547
yifK	0.0875	0	0.671833	0	0.0508998	0.0227976
gntU	0.0615	0.807535	0.695833	0.644556	0.0368966	0.0230236
ddpD	0.0395	0	0.635833	0	0.0240673	0.0230346
aaeA	0.114	0	0.693667	0	0.0678753	0.0235614
glpT	0.071	0.700146	0.672167	0.61812	0.0409178	0.023592
ynfA	0.084	1.49954	0.579917	2.11867	0.0565655	0.0236093
cusA	0.11	0.0145099	0.70475	0.0149879	0.0652831	0.0239558
yrbG	0.1105	0	0.689583	0	0.0657408	0.0241008
yfdC	0.07	0	0.72	0	0.0417244	0.0241953
yicJ	0.2005	0.446514	0.741167	0.342165	0.120742	0.0246584
atoS	0.13	0	0.734333	0	0.0743865	0.0247043
ybjJ	0.124	0	0.720083	0	0.0750315	0.0247375
yedA	0.12	0.0579415	0.702667	0.0518939	0.0727717	0.0249587
ygaH	0.124	0	0.787167	0	0.072277	0.0252728
exuT	0.1495	0.207919	0.742417	0.168077	0.0892884	0.0254787
ybjL	0.1115	0	0.746333	0	0.0673588	0.0256466
ygaZ	0.0785	0.0605166	0.651333	0.0586375	0.0570231	0.02587
yhdW	0.043	0	0.757	0	0.0259462	0.0262303
mscS	0.123	0	0.772583	0	0.0746522	0.0269451
ybaL	0.1	0	0.67825	0	0.0691325	0.0269961
ybhN	0.121	0	0.801333	0	0.0747493	0.0271864
ybhI	0.134	0	0.82825	0	0.080724	0.0281925
fryC	0.136	0	0.85975	0	0.0807338	0.0286998
narK	0.286	0.598638	0.877833	0.547755	0.170819	0.0309961
manY	0.09	0	0.81225	0	0.0640336	0.0319638
yfcC	0.1415	0	0.943667	0	0.0860436	0.0325955
zitB	0.2415	0.616212	1.01633	0.528952	0.147199	0.0355161
lldP	0.0865	0	1.03775	0	0.0509758	0.0359829
kdgT	0.267	0.496218	1.06242	0.40459	0.164383	0.0366393
yraQ	0.166	0.115135	1.04283	0.106589	0.0989952	0.037211
yfjD	0.4065	0.592374	1.18375	0.450822	0.246061	0.0402903
ynjD	0.123	1.34229	1.22575	1.17423	0.0746858	0.0444052
phnD	0.197	0.248349	1.58142	0.194872	0.120197	0.0551191
fetB	0.522	1.28525	1.511	1.0305	0.321166	0.0553544
yicL	0.2795	0.128818	1.66258	0.0994771	0.163143	0.0559466
alsC	0.196	0.450744	1.75292	0.351854	0.118271	0.0608382
yeeO	0.89	0.628122	1.97542	0.525476	0.529652	0.0663946
rbbA	0.7695	0.437666	2.06775	0.371963	0.459669	0.0733358
yqeG	0.2605	0.473911	2.20675	0.390154	0.158102	0.0768521
lptB	0.252	0.708788	2.16575	0.593344	0.156329	0.0810701
rhmT	0.5985	0.533768	2.40483	0.438596	0.362524	0.0853355
yhdX	1.212	0.341298	2.88842	0.248668	0.744869	0.101163
frlA	0.3375	0.570216	2.90325	0.45125	0.206373	0.101765
glvC	1.202	0.490344	2.98825	0.417677	0.699738	0.103634
ampG	0.3185	1.18313	3.08358	1.07544	0.189946	0.108172
mscL	0.39	0.233287	2.82742	0.208814	0.240787	0.108237
ptsN	0.274	0.574114	2.88992	0.582905	0.174074	0.109221
ptsP	0.384	0.597555	3.16375	0.484838	0.231173	0.109693
argT	1.173	1.36432	3.06967	1.30088	0.800268	0.111682
ybhF	1.647	0.53958	3.41517	0.548845	0.947316	0.115747
mtr	0.432	0.587887	3.58967	0.525522	0.253856	0.11906
galP	1.6825	0.553185	3.61625	0.44885	0.957308	0.11971
exbB	0.841	0.265293	3.82933	0.222319	0.479772	0.123367
yihP	1.2655	1.32712	3.75817	1.1363	0.747411	0.126616
ptsI	0.499	1.43078	4.42192	1.06941	0.283219	0.153206
mdlB	3.399	0.722371	4.71275	0.523335	1.98797	0.156766
potH	0.231	0	4.66033	0	0.137995	0.162762
dsdX	1.3845	0.460401	4.84825	0.434939	0.810358	0.174221
mhpT	1.5535	0.77177	5.29242	0.530634	0.898822	0.175004
ygbN	1.0355	0.482055	5.42483	0.435689	0.641231	0.191929
yhfK	1.842	0.892926	5.69067	0.765068	1.12112	0.211141
clcA	1.1695	0.816453	5.9025	0.631318	0.719039	0.216475
guaB	2.1205	0.623586	6.30758	0.680894	1.28922	0.222946
yijE	1.272	0.795083	6.45367	0.656806	0.77307	0.224902
yeaV	1.23	0.740575	6.55083	0.627206	0.739814	0.227022
ynjB	1.619	0.925676	6.4815	0.704502	0.986507	0.234984
rarD	1.601	1.38023	6.67742	0.964732	0.971607	0.239909
ybbW	2.3215	0.652711	6.62492	0.569434	1.43451	0.240733
tatC	1.6945	0.338252	7.27383	0.289053	1.00296	0.251585
ulaA	2.534	0.956305	7.38242	0.688384	1.50315	0.259019
yegH	1.261	0.810056	7.29033	0.569519	0.781667	0.260172
yheS	1.9245	0.709532	7.28875	0.539968	1.18961	0.260581
nikC	2.458	0.546473	8.01792	0.43731	1.49658	0.275769
ydcO	1.337	0.663548	7.46875	0.572941	0.836733	0.277608
focB	2.547	0.709888	8.0985	0.604065	1.54747	0.28216
clcB	1.5835	0.830103	8.12067	0.642538	0.957356	0.289649
yajR	2.7695	0.870141	7.84717	0.764979	1.74141	0.293254
dgoT	1.372	1.41053	9.20742	1.14175	0.812213	0.306641
pheP	1.655	0.780156	9.56008	0.625868	0.973934	0.316674
ydjK	1.371	0.716149	9.15983	0.730304	0.821528	0.317646
mdtI	2.309	0.978352	8.95367	1.01815	1.3369	0.326386
eamA	1.818	1.13359	9.08842	0.863008	1.07233	0.328599
uhpC	1.3615	1.07728	9.72458	0.927678	0.80536	0.329564
garP	1.8355	0.776017	10.3107	0.721945	1.06359	0.350505
yhhT	1.2935	1.22797	10.3412	0.845985	0.779842	0.35124
cysP	2.4005	0.711521	10.5737	0.60884	1.44781	0.367313
yhdY	1.3045	1.30047	10.3964	1.06823	0.788899	0.367527
phnL	1.84	1.33083	10.3765	1.16557	1.08378	0.369963
yiaN	1.602	0.681555	10.3104	0.535543	0.981346	0.37432
yahN	1.4855	0.749119	11.5042	0.546095	0.887003	0.386237
yneE	1.492	0.774867	10.4089	0.702474	0.954152	0.386731
fucP	1.382	0.789655	12.0554	0.706438	0.808585	0.394341
kup	1.911	0.641689	11.1202	0.485221	1.15645	0.39797
gdx	1.6445	0.759417	10.9398	0.624109	1.01283	0.401619
gabP	1.0945	0.689946	11.9504	0.583009	0.649718	0.405993
rcnB	1.575	0.74871	11.5998	0.550935	0.974175	0.413802
ansP	1.869	0.784652	12.4662	0.741943	1.11108	0.416145
nlpA	1.958	1.16772	11.8962	1.02581	1.15257	0.424606
yehW	2.72	1.03959	12.0292	1.08066	1.6821	0.425948
ghxQ	2.9385	0.861664	11.7554	0.724031	1.79001	0.426486
dctA	1.346	0.615849	12.3468	0.537593	0.817135	0.433631
dlsT	1.9055	0.791046	12.7643	0.552996	1.16012	0.445272
adeQ	1.7325	0.759178	12.3414	0.552362	1.06187	0.451331
metI	2.257	0.842101	12.7016	0.714606	1.33615	0.464454
proP	1.832	0.783681	14.4047	0.640613	1.05552	0.465322
ydiK	2.743	0.873817	13.4877	0.741394	1.6671	0.465327
melB	1.243	0.672736	13.9125	0.576675	0.729727	0.470331
mlaE	1.8825	1.25717	13.218	0.967682	1.13058	0.487248
agaC	1.8955	0.513787	13.9783	0.407809	1.17455	0.490684
sufB	1.428	0.741711	13.9168	0.534783	0.886897	0.493014
hisM	1.886	1.23054	14.1476	1.08456	1.12493	0.497883
emrD	2.1095	0.384567	14.769	0.281832	1.26517	0.499412
yjbB	2.1115	0.819034	13.7397	0.731032	1.23894	0.501325
kefB	2.841	0.854196	13.6438	0.675575	1.76852	0.50292
dppB	1.356	0.670191	14.6368	0.549432	0.828153	0.503041
treB	1.552	0.421612	14.7543	0.348521	0.940386	0.508745
plaP	2.1795	0.788522	14.5962	0.607771	1.33194	0.509697
puuP	1.5735	0.767469	14.4354	0.635673	0.953304	0.510184
mdtO	2.4015	0.677151	15.9644	0.538121	1.34471	0.516574
yhhJ	1.8265	0.768818	15.1817	0.561598	1.10986	0.518606
narU	2.8325	0.565476	15.7568	0.435696	1.65389	0.525591
yjfF	1.6755	1.22799	14.0147	1.34132	1.01781	0.53646
setB	1.817	0.975267	15.7242	0.926128	1.09352	0.539779
cycA	1.614	0.877829	16.1669	0.678816	0.945884	0.542954
ynjC	1.7945	1.14775	15.6683	0.878573	1.08817	0.548716
rhtC	1.9315	0.730655	15.7523	0.523431	1.1705	0.552847
yojI	2.8605	0.759578	16.6104	0.612719	1.72825	0.55702
rhtB	2.4145	0.776956	16.0921	0.552307	1.44834	0.557951
xanP	1.6785	0.846428	16.1227	0.639381	1.02686	0.560017
yddA	2.1245	0.938754	16.6534	0.731088	1.24686	0.573334
atpI	2.221	1.29182	16.8667	0.980994	1.31621	0.580097
gntT	3.0745	0.837502	16.9052	0.703261	1.85204	0.593059
yadH	1.856	1.14477	17.1459	0.91867	1.10606	0.593815
mdtB	1.9435	1.36807	17.8257	1.07999	1.154	0.595019
yjjP	2.2065	0.777178	17.1755	0.560288	1.29583	0.599503
ugpA	3.0235	0.694778	18.0787	0.574599	1.8205	0.609755
nimT	1.858	1.32879	17.4269	1.01882	1.09426	0.611232
bcr	2.046	0.768901	17.3283	0.572037	1.22563	0.616887
gltS	2.8965	0.89691	17.8339	0.673382	1.75653	0.628815
srlA	2.1115	1.31856	18.1833	1.12301	1.27709	0.664639
tdcC	1.881	1.10626	19.5562	0.914796	1.1103	0.672861
ytfT	1.8765	0.962269	19.2591	0.701384	1.15134	0.680183
cysW	1.8735	0.846524	18.5323	0.734381	1.19434	0.682641
alx	2.3425	1.34976	19.6194	1.04383	1.40918	0.683171
malF	1.6025	0.605223	18.7139	0.4507	0.927921	0.691834
yccS	2.862	0.773456	18.9357	0.606621	1.76956	0.693365
lacY	1.8445	1.19566	21.5304	0.982195	1.04626	0.696656
ybhR	2.1115	0.747515	18.9879	0.634626	1.2529	0.700961
ybiR	3.3135	0.574895	21.0978	0.490357	1.98798	0.706701
ycaM	2.491	0.728969	20.966	0.593242	1.47914	0.710376
hsrA	1.983	0.805003	19.6956	0.677683	1.17752	0.715729
cmtA	2.041	0.828374	20.2668	0.718894	1.2539	0.716769
yicG	3.205	0.908948	21.3729	0.717718	1.88374	0.716816
nupG	2.2115	0.625849	20.0267	0.512865	1.35037	0.724453
xylH	2.316	0.76777	19.5806	0.638314	1.4329	0.725913
artJ	4.5095	0.775779	19.4938	0.689533	3.05514	0.727109
aqpZ	2.3545	0.817665	21.455	0.733524	1.38127	0.762925
arnF	1.997	0.708869	21.108	0.554393	1.22614	0.771523
agaV	3.239	0.742185	22.9173	0.619952	1.95936	0.790753
panF	2.7775	0.616031	24.1696	0.479193	1.62678	0.812752
rutG	3.073	1.31993	23.6208	1.49326	1.88105	0.82262
emrY	2.855	0.89088	23.9656	0.740685	1.68729	0.835278
pitA	4.2325	0.580866	22.6483	0.45205	2.61009	0.83813
nirC	3.3495	0.994109	24.0847	0.845297	2.0053	0.839671
dhaM	3.719	1.00015	25.4421	0.793116	2.21887	0.852326
dcuA	3.075	1.0228	24.6288	0.841464	1.89057	0.852596
ssuC	3.5575	0.824082	22.332	0.703673	2.44179	0.855589
yebQ	2.296	0.738174	21.4516	1.11373	1.46331	0.863554
acrF	2.5285	1.22166	25.3015	1.2069	1.49514	0.865362
yqcE	4.481	0.302741	26.2023	0.272078	2.73873	0.904369
gntP	2.9505	0.961789	26.2397	0.755549	1.79411	0.909558
gudP	3.4955	0.846486	25.3252	0.639354	2.14774	0.917656
atoE	4.218	1.01683	24.7744	0.8414	2.59512	0.920477
dcuB	2.6545	0.744428	26.5167	0.603623	1.58115	0.923718
frvB	4.9545	0.674414	26.3367	0.508331	2.93866	0.925619
fruA	2.612	0.65437	26.2704	0.534531	1.58468	0.937701
mtlA	3.2165	0.820045	28.7836	0.642813	1.88162	0.938679
ytfF	3.2065	0.710606	26.3912	0.594096	1.96748	0.942803
arsB	4.059	0.909751	28.0538	0.752302	2.36281	0.943032
yjeM	3.4425	0.908032	27.2123	0.736453	2.12829	0.957573
rhaT	3.493	1.03022	29.4093	0.826812	2.02098	0.971348
gltP	3.9175	0.977724	27.7438	0.820375	2.38408	1.01399
yidE	4.3135	0.890395	30.9047	0.731177	2.49168	1.01556
livH	3.093	0.745467	29.2088	0.6243	1.8812	1.03313
nanT	2.5805	0.55609	31.9538	0.456116	1.47058	1.03856
mdlA	2.6415	1.49291	29.7355	1.27062	1.61533	1.05876
emrB	3.532	0.891313	30.7721	0.801926	2.07569	1.08492
sdaC	3.4	0.787711	31.4238	0.789628	2.01263	1.09663
yphE	3.145	0.55734	31.4205	0.510137	1.84919	1.10418
trkH	3.519	0.893891	30.8244	0.657675	2.17623	1.11431
crr	5.004	1.05043	31.7059	0.826924	2.9988	1.11495
xanQ	4.7325	0.86178	30.4411	0.830782	2.8924	1.12218
ascF	3.7135	1.03916	30.2632	0.860117	2.2842	1.124
yegT	4.9205	1.11966	33.5838	1.02723	2.89255	1.16882
cmtB	5.1	0.823387	32.1808	0.695217	3.11186	1.18016
feoB	3.916	0.779148	33.2893	0.576962	2.4027	1.21143
fsr	4.5025	1.0472	36.6405	0.876034	2.61262	1.24081
tolR	4.5625	0.857501	35.2027	0.74277	2.89027	1.25132
perM	4.356	0.971029	33.4635	0.806803	2.7352	1.25821
ybiO	3.046	0.931913	32.4955	1.01704	2.01041	1.26269
mgtA	3.3155	0.86754	34.6567	0.60841	2.19893	1.27776
cadB	3.846	1.10633	35.9087	0.959419	2.37149	1.28543
potE	4.512	0.953487	36.6278	0.809299	2.80668	1.3157
uacT	3.7225	1.00975	39.9285	0.811056	2.20373	1.31721
exbD	3.496	0.695494	38.9257	0.598665	2.00354	1.32538
livJ	4.1875	0.973482	37.9652	0.927142	2.44638	1.32847
proW	3.5845	0.839678	34.6097	1.0402	2.21632	1.35374
yhhS	3.3485	0.946453	38.4243	0.724697	2.03318	1.35756
acrD	3.738	0.931688	39.9045	0.831635	2.28065	1.36652
potB	5.2835	0.931054	38.4814	0.805114	3.21553	1.3965
mngA	4.6755	0.958545	42.5007	0.879658	2.72177	1.43272
modF	4.9875	0.917047	39.556	0.773264	3.074	1.44292
tehA	3.794	0.824316	40.8043	0.861124	2.25453	1.46254
xylE	3.171	0.968449	42.8347	0.808961	1.87435	1.47949
tolQ	5.208	0.772597	41.0384	0.854313	3.28081	1.48423
uraA	5.627	0.937237	43.4473	0.940833	3.48382	1.51194
hofC	4.628	0.949141	45.0856	0.741728	2.73332	1.53163
shiA	4.9475	1.02938	47.1868	0.726265	2.93666	1.55783
betT	4.2645	0.987996	46.5269	0.891381	2.48847	1.58845
bglF	5.5985	1.08228	49.4488	0.841657	3.15311	1.61551
yjcE	5.78	1.1107	49.3356	0.990539	3.27429	1.67496
ybaT	3.8445	1.09316	47.5296	0.97593	2.36761	1.7133
dcuD	4.452	1.00193	46.8868	0.889289	2.77475	1.73154
dtpC	4.019	1.10408	52.5028	0.783723	2.34587	1.74353
lsrA	5.125	0.817079	50.4387	0.692687	3.00522	1.75343
yphD	2.07	0.946423	48.6283	0.826874	1.3037	1.75826
znuB	4.367	1.07972	51.8552	0.966185	2.59952	1.78234
idnT	5.379	0.946838	53.9346	0.83346	3.12665	1.8111
livK	1.7615	0.942932	50.5078	0.721747	1.08251	1.81329
fepD	5.564	0.936547	50.5845	0.819009	3.49183	1.82149
mscM	5.4395	1.01505	54.0132	0.833887	3.16155	1.84769
codB	6.656	1.10318	52.7709	0.89863	3.94583	1.86111
ynfM	2.623	0.958178	54.7262	0.8399	1.60977	1.8771
adiC	6.3545	1.00571	56.405	0.852553	3.65215	1.93476
adeP	5.7795	1.09625	56.1193	0.903197	3.35495	1.93768
sapB	4.8385	1.13022	50.5078	1.13956	3.11926	1.96992
ycjO	4.9645	1.07967	57.9395	0.993116	3.08	2.04493
ybiT	5.879	1.02475	60.1843	0.866632	3.45017	2.06093
uhpT	5.9495	1.07829	58.6266	0.813077	3.57388	2.0697
ddpB	7.2285	1.10156	58.1759	1.12951	4.37907	2.07823
oppB	4.967	1.0351	56.7797	1.00271	3.05906	2.11364
rbsC	5.823	1.09331	64.9409	0.893304	3.40798	2.12331
araE	5.515	1.08201	62.9447	0.924135	3.3031	2.15276
torT	5.9235	0.846043	57.946	0.710807	3.70993	2.1547
ytfL	5.4725	0.96755	61.1296	0.782528	3.21878	2.16192
amtB	6.311	0.881399	60.4121	0.785274	3.88666	2.16688
dinF	6.7725	0.968766	61.6514	0.756631	4.04321	2.16913
ygiS	5.2765	1.10488	62.8187	0.838793	3.23433	2.17409
actP	6.1945	0.974703	61.4296	0.741637	3.59964	2.18251
tyrP	5.46	0.965958	63.2518	0.805174	3.32089	2.20285
brnQ	4.682	1.01085	61.9237	0.843846	2.85945	2.26383
kch	6.59	1.06336	64.6056	0.966565	3.95249	2.27186
ydjN	6.051	1.02792	67.097	0.885903	3.529	2.29159
mdtN	5.101	0.9954	66.327	0.792389	3.01193	2.31073
fetA	6.8005	0.877627	64.3555	0.805873	4.13987	2.31353
btuC	6.0015	1.16686	69.6061	1.16721	3.62054	2.44335
caiT	8.476	1.0688	70.5016	0.838928	5.12075	2.45773
glvB	6.072	1.02602	71.1757	0.978927	3.55595	2.48703
aroP	6.8755	1.06636	69.8293	0.913878	4.16379	2.50015
ydgI	5.881	1.12979	73.9365	0.843079	3.51632	2.51625
fieF	5.8725	0.939148	73.888	0.721615	3.42923	2.53976
yidK	6.316	0.958893	77.3923	0.69752	3.69847	2.58782
frwC	5.8055	1.00848	74.6442	0.783226	3.57653	2.63264
yihN	6.0225	0.911182	76.4537	0.776058	3.50644	2.63666
artQ	6.8685	1.23986	77.0865	1.13346	4.15831	2.64169
chaA	5.281	1.02002	69.0073	1.01264	3.36291	2.654
kefC	5.596	0.978211	72.9032	0.820311	3.37278	2.656
glnP	6.888	1.23595	78.0985	1.1656	4.161	2.66569
modB	5.724	1.15086	75.3007	0.898283	3.54467	2.67715
ccmC	5.8285	1.11318	71.8169	1.07366	3.72158	2.71701
corA	6.0645	0.930031	75.0773	0.878587	3.55446	2.72706
glpF	7.75	0.989981	78.6503	0.824254	4.71968	2.75042
nagE	5.895	0.995986	73.8492	0.879659	3.76936	2.78137
wt	9.14	1.63733	86.0825	1.14317	5.15225	2.78736
gadC	6.846	1.16846	82.4446	1.06783	4.06484	2.78831
phnK	9.166	1.00415	80.2338	0.834181	5.43031	2.83875
gltK	7.392	0.954532	77.0999	0.796707	4.58897	2.85228
yaaU	6.868	1.14422	78.7967	0.971378	4.2679	2.86829
wzxE	7.772	1.01288	81.176	0.855586	4.68687	2.86834
gsiC	8.065	1.01509	80.2454	0.956042	5.01695	2.91077
mdfA	5.7775	1.10165	78.0048	0.889427	3.67329	2.94726
lysP	7.0015	1.02115	87.5957	0.88662	4.1614	3.00207
kdpA	8.8325	1.01093	84.2983	0.829302	5.34176	3.01529
araJ	6.623	1.15991	84.6496	0.947325	4.05024	3.02705
sbp	5.707	1.11414	78.726	0.888779	3.61117	3.03103
malX	6.555	1.08674	84.2056	0.855873	4.11827	3.04097
pstC	8.529	1.00856	88.0842	0.944759	5.06233	3.0453
ybbA	6.3355	1.16332	83.8726	1.06511	3.86916	3.07164
ettA	8.708	1.00366	91.0565	0.72523	5.10606	3.10575
ptsG	7.4085	1.01909	89.6115	0.904322	4.45681	3.14254
ydjE	6.0195	1.05527	81.1162	1.06459	3.86385	3.26314
xapB	6.8355	1.08849	88.1997	0.944615	4.26659	3.28439
chbC	6.608	1.19012	89.9438	0.99387	4.15909	3.28543
sotB	7.397	1.20618	92.7422	0.958591	4.54787	3.34501
cynX	7.212	1.18351	91.8139	1.09478	4.37012	3.34841
mglC	8.8235	1.01702	94.6956	0.951549	5.4163	3.3615
mdtG	7.438	1.29001	98.8491	1.23504	4.49211	3.41852
uidB	7.9535	1.15444	98.419	0.913688	4.80698	3.43933
nhaB	7.133	1.22822	96.1007	1.10817	4.4092	3.44921
mscK	7.5955	1.27474	95.3799	1.10902	4.56376	3.50296
artI	8.0755	1.01395	101.119	0.789378	4.71755	3.50753
ydcV	7.5795	1.19415	99.8065	0.928235	4.6003	3.50772
sapA	6.9445	1.22239	98.2457	1.01522	4.36961	3.51465
ycjP	8.394	1.08005	104.647	0.871506	4.99699	3.5515
copA	7.426	1.23672	98.5076	1.07312	4.4918	3.60063
putP	9.603	1.00524	108.509	0.977698	5.70502	3.69436
acrB	7.701	1.14416	101.263	0.944757	4.59127	3.69478
focA	8.048	1.1029	104.906	0.931122	4.88176	3.73136
uup	7.6025	1.12171	103.971	1.0657	4.72591	3.85302
setA	9.2295	0.930122	117.489	0.783102	5.40573	4.04932
citT	9.344	0.996774	112.035	0.968808	5.72217	4.09579

[truncated: 9 more sheets: Meropenem, Ofloxacin, Ornidazole, Paraquat, Phosphomycin, Rifampicin, Streptomycin, Trimethoprim, Zidovudine]
